# Supplementary material for: CPEB3 regulates neuron-specific alternative splicing and involves neurogenesis gene expression
Source: Aging (Albany NY). 2020 Dec 9;13(2):2330–47. doi: 10.18632/aging.202259 (PMC7880327; doi:10.18632/aging.202259)
Supplement: Supplementary Table 1 [file aging-13-202259-s001.xlsx]

## Sheet: Supplementary Table 1
Supplementary Table 1. Summary of RNA-seq reads used in the analysis.
chrY	7049166	7049331	chrY_8493_IP1	3	+	166	3	7049184	intergenic;	--
chrY	90797898	90798040	chrY_8695_IP1	4	-	143	4	90797934	antisense;	ENSMUSG00000096768.5	Erdr1	chrY	protein_coding	erythroid differentiation regulator 1
chrY	6823238	6823394	chrY_8477_IP1	3	+	157	3	6823250	intergenic;	--
chrY	90742792	90743235	chrY_8687_IP1	24	-	444	10	90742947	intergenic;	--
chrY	4996690	4996833	chrY_8598_IP1	3	-	144	3	4996693	intergenic;	--
chrY	8252597	8252780	chrY_8635_IP1	4	-	184	4	8252633	intron:1.0;	ENSMUSG00000100421.1	Gm29044	chrY	lincRNA	predicted gene 29044
chrY	1352028	1352291	chrY_8442_IP1	3	+	264	3	1352144	antisense;	ENSMUSG00000069044.6	Usp9y	chrY	protein_coding	ubiquitin specific peptidase 9, Y chromosome
chrY	2737085	2737249	chrY_8444_IP1	3	+	165	3	2737103	intergenic;	--
chrY	90825661	90825785	chrY_8708_IP1	4	-	125	4	90825682	intergenic;	--
chrY	90743243	90743415	chrY_8688_IP1	6	-	173	6	90743268	intergenic;	--
chrX	105928701	105928854	chrX_12964_IP1	5	-	154	5	105928742	intron:1.0;	ENSMUSG00000031229.14	Atrx	chrX	protein_coding	alpha thalassemia/mental retardation syndrome X-linked homolog (human)
chrX	131376253	131376498	chrX_13390_IP1	3	-	246	3	131376351	intergenic;	--
chrX	78594782	78594995	chrX_12501_IP1	3	-	214	3	78594849	intergenic;	--
chrX	108837426	108837559	chrX_10377_IP1	4	+	134	4	108837451	intergenic;	--
chrX	122020859	122020991	chrX_13263_IP1	3	-	133	3	122020862	intergenic;	--
chrX	46624569	46624720	chrX_9274_IP1	3	+	152	3	46624574	antisense;	ENSMUSG00000101233.1	Gm29242	chrX	lincRNA	predicted gene 29242
chrX	12587822	12587935	chrX_8844_IP1	4	+	114	4	12587884	five_prime_UTR:0.65;CDS:0.35;	ENSMUSG00000031007.2	Atp6ap2	chrX	protein_coding	ATPase, H+ transporting, lysosomal accessory protein 2
chrX	46684288	46684475	chrX_9277_IP1	3	+	188	3	46684330	antisense;	ENSMUSG00000101233.1	Gm29242	chrX	lincRNA	predicted gene 29242
chrX	52062889	52063023	chrX_12031_IP1	4	-	135	4	52062952	CDS:1.0;	ENSMUSG00000031119.4	Gpc4	chrX	protein_coding	glypican 4
chrX	89238983	89239142	chrX_12681_IP1	3	-	160	3	89238996	intergenic;	--
chrX	130223171	130223373	chrX_10736_IP1	3	+	203	3	130223226	intron:1.0;	ENSMUSG00000034480.16	Diap2	chrX	protein_coding	diaphanous homolog 2 (Drosophila)
chrX	83084851	83085062	chrX_12568_IP1	3	-	212	3	83084915	antisense;	ENSMUSG00000045103.15	Dmd	chrX	protein_coding	dystrophin, muscular dystrophy
chrX	132658994	132659162	chrX_13406_IP1	3	-	169	3	132659017	intergenic;	--
chrX	35844682	35844803	chrX_11736_IP1	3	-	122	3	35844685	intergenic;	--
chrX	126950577	126950761	chrX_13322_IP1	4	-	185	4	126950613	intergenic;	--
chrX	101429686	101429772	chrX_10198_IP1	10	+	87	10	101429741	five_prime_UTR:0.88;intron:0.12;	ENSMUSG00000031311.15	Nono	chrX	protein_coding	non-POU-domain-containing, octamer binding protein
chrX	116796124	116796328	chrX_10528_IP1	3	+	205	3	116796181	intergenic;	--
chrX	36645049	36645168	chrX_11750_IP1	4	-	120	4	36645062	five_prime_UTR:1.0;	ENSMUSG00000059708.10	Akap17b	chrX	protein_coding	A kinase (PRKA) anchor protein 17B
chrX	128824603	128824776	chrX_10701_IP1	3	+	174	3	128824629	intergenic;	--
chrX	80039990	80040270	chrX_9788_IP1	3	+	281	3	80040124	intergenic;	--
chrX	137527192	137527465	chrX_10846_IP1	3	+	274	3	137527318	intergenic;	--
chrX	141644874	141644945	chrX_10934_IP1	4	+	72	4	141644887	CDS:1.0;	ENSMUSG00000031274.14	Col4a5	chrX	protein_coding	collagen, type IV, alpha 5
chrX	49586877	49587134	chrX_11987_IP1	4	-	258	4	49586988	intergenic;	--
chrX	46514006	46514243	chrX_11931_IP1	3	-	238	3	46514097	intron:1.0;	ENSMUSG00000101233.1	Gm29242	chrX	lincRNA	predicted gene 29242
chrX	126693264	126693481	chrX_13315_IP1	3	-	218	3	126693335	intergenic;	--
chrX	73824588	73824728	chrX_12368_IP1	4	-	141	4	73824591	five_prime_UTR:1.0;	ENSMUSG00000002006.10	Pdzd4	chrX	protein_coding	PDZ domain containing 4
chrX	144865937	144866154	chrX_13626_IP1	5	-	218	5	144866009	antisense;	ENSMUSG00000071679.4	Zcchc16	chrX	protein_coding	zinc finger, CCHC domain containing 16
chrX	68982611	68982840	chrX_9559_IP1	4	+	230	4	68982693	intergenic;	--
chrX	68540136	68540494	chrX_9548_IP1	10	+	359	9	68540250	intergenic;	--
chrX	135251391	135251679	chrX_10819_IP1	3	+	289	3	135251532	intergenic;	--
chrX	88336221	88336450	chrX_9946_IP1	3	+	230	3	88336306	intergenic;	--
chrX	104332240	104332406	chrX_10254_IP1	3	+	167	3	104332259	antisense;	ENSMUSG00000031333.7	Abcb7	chrX	protein_coding	ATP-binding cassette, sub-family B (MDR/TAP), member 7
chrX	104341057	104341198	chrX_12931_IP1	3	-	142	3	104341060	intron:1.0;	ENSMUSG00000031333.7	Abcb7	chrX	protein_coding	ATP-binding cassette, sub-family B (MDR/TAP), member 7
chrX	100547911	100548115	chrX_10158_IP1	3	+	205	3	100547968	intergenic;	--
chrX	7725930	7726143	chrX_8742_IP1	6	+	214	6	7725996	CDS:0.5;intron:0.5;	ENSMUSG00000039382.9	Wdr45	chrX	protein_coding	WD repeat domain 45
chrX	152537028	152537234	chrX_11154_IP1	4	+	207	4	152537096	intergenic;	--
chrX	76979933	76980089	chrX_12482_IP1	3	-	157	3	76979944	intergenic;	--
chrX	151928241	151928380	chrX_11120_IP1	4	+	140	4	151928249	CDS:1.0;	ENSMUSG00000025261.15	Huwe1	chrX	protein_coding	HECT, UBA and WWE domain containing 1
chrX	84219826	84220044	chrX_12594_IP1	3	-	219	3	84219897	antisense;	ENSMUSG00000045103.15	Dmd	chrX	protein_coding	dystrophin, muscular dystrophy
chrX	93335646	93335896	chrX_12734_IP1	3	-	251	3	93335752	intron:1.0;	ENSMUSG00000006678.6	Pola1	chrX	protein_coding	polymerase (DNA directed), alpha 1
chrX	95899076	95899277	chrX_10084_IP1	3	+	202	3	95899130	five_prime_UTR:0.09;CDS:0.91;	ENSMUSG00000035045.15	Zc3h12b	chrX	protein_coding	zinc finger CCCH-type containing 12B
chrX	151919575	151919710	chrX_11114_IP1	6	+	136	5	151919630	CDS:1.0;	ENSMUSG00000025261.15	Huwe1	chrX	protein_coding	HECT, UBA and WWE domain containing 1
chrX	93962166	93962262	chrX_10043_IP1	3	+	97	3	93962169	intergenic;	--
chrX	101430492	101430552	chrX_10199_IP1	7	+	61	6	101430492	five_prime_UTR:1.0;	ENSMUSG00000031311.15	Nono	chrX	protein_coding	non-POU-domain-containing, octamer binding protein
chrX	141203770	141203920	chrX_13560_IP1	4	-	151	4	141203849	CDS:1.0;	ENSMUSG00000031273.14	Col4a6	chrX	protein_coding	collagen, type IV, alpha 6
chrX	50639472	50639616	chrX_12008_IP1	3	-	145	3	50639475	intergenic;	--
chrX	106221089	106221356	chrX_10295_IP1	7	+	268	6	106221194	antisense;	ENSMUSG00000047242.12	Taf9b	chrX	protein_coding	TAF9B RNA polymerase II, TATA box binding protein (TBP)-associated factor
chrX	51029273	51029408	chrX_12017_IP1	3	-	136	3	51029276	intergenic;	--
chrX	107297224	107297367	chrX_10356_IP1	4	+	144	4	107297248	intergenic;	--
chrX	74275375	74275515	chrX_9661_IP1	3	+	141	3	74275378	antisense;	ENSMUSG00000019088.11	Dnase1l1	chrX	protein_coding	deoxyribonuclease 1-like 1
chrX	160913091	160913244	chrX_13853_IP1	5	-	154	5	160913098	intron:1.0;	ENSMUSG00000031292.12	Cdkl5	chrX	protein_coding	cyclin-dependent kinase-like 5
chrX	74225397	74225491	chrX_12406_IP1	8	-	95	8	74225398	CDS:1.0;	ENSMUSG00000031328.13	Flna	chrX	protein_coding	filamin, alpha
chrX	51852036	51852326	chrX_9345_IP1	3	+	291	3	51852179	intergenic;	--
chrX	131062605	131062766	chrX_10749_IP1	4	+	162	4	131062619	intergenic;	--
chrX	169261209	169261413	chrX_13964_IP1	3	-	205	3	169261267	antisense;	ENSMUSG00000031355.14	Arhgap6	chrX	protein_coding	Rho GTPase activating protein 6
chrX	88388792	88388957	chrX_12668_IP1	3	-	166	3	88388811	antisense;	ENSMUSG00000081877.1	Gm8858	chrX	processed_pseudogene	predicted gene 8858
chrX	93651093	93651278	chrX_10039_IP1	3	+	186	3	93651205	intergenic;	--
chrX	160137925	160138197	chrX_13848_IP1	6	-	273	5	160138082	intron:1.0;	ENSMUSG00000031299.10	Pdha1	chrX	protein_coding	pyruvate dehydrogenase E1 alpha 1
chrX	38478332	38478606	chrX_9120_IP1	4	+	275	4	38478460	intron:1.0;	ENSMUSG00000087390.1	Gm7598	chrX	lincRNA	predicted gene 7598
chrX	151046979	151047159	chrX_11053_IP1	6	+	181	5	151047075	intron:1.0;	ENSMUSG00000025265.12	Fgd1	chrX	protein_coding	FYVE, RhoGEF and PH domain containing 1
chrX	106346427	106346634	chrX_10325_IP1	5	+	208	5	106346487	intergenic;	--
chrX	126009790	126010066	chrX_13302_IP1	3	-	277	3	126009921	intergenic;	--
chrX	13281704	13281915	chrX_11565_IP1	3	-	212	3	13281794	antisense;	ENSMUSG00000000787.10	Ddx3x	chrX	protein_coding	DEAD/H (Asp-Glu-Ala-Asp/His) box polypeptide 3, X-linked
chrX	151344721	151344907	chrX_11071_IP1	4	+	187	4	151344760	CDS:1.0;	ENSMUSG00000025262.8	Fam120c	chrX	protein_coding	family with sequence similarity 120, member C
chrX	104988869	104989138	chrX_10268_IP1	3	+	270	3	104988993	intergenic;	--
chrX	74225039	74225258	chrX_12405_IP1	11	-	220	6	74225252	CDS:1.0;	ENSMUSG00000031328.13	Flna	chrX	protein_coding	filamin, alpha
chrX	88443288	88443488	chrX_12669_IP1	3	-	201	3	88443342	intergenic;	--
chrX	94123443	94123634	chrX_10047_IP1	4	+	192	4	94123572	intergenic;	--
chrX	111081218	111081408	chrX_10415_IP1	3	+	191	3	111081261	intergenic;	--
chrX	12007058	12007204	chrX_11529_IP1	3	-	147	3	12007115	intergenic;	--
chrX	98399244	98399418	chrX_10129_IP1	3	+	175	3	98399272	intergenic;	--
chrX	14872088	14872312	chrX_11588_IP1	4	-	225	4	14872167	intergenic;	--
chrX	36865253	36865464	chrX_11754_IP1	3	-	212	3	36865317	intron:1.0;	ENSMUSG00000006423.13	C330007P06Rik	chrX	protein_coding	RIKEN cDNA C330007P06 gene
chrX	163936378	163936646	chrX_13887_IP1	7	-	269	7	163936499	CDS:1.0;	ENSMUSG00000031370.10	Zrsr2	chrX	protein_coding	zinc finger (CCCH type), RNA binding motif and serine/arginine rich 2
chrX	106397905	106398150	chrX_10334_IP1	4	+	246	4	106398003	intergenic;	--
chrX	13072021	13072192	chrX_8857_IP1	16	+	172	16	13072081	intron:1.0;	ENSMUSG00000031010.15	Usp9x	chrX	protein_coding	ubiquitin specific peptidase 9, X chromosome
chrX	159255915	159256097	chrX_11247_IP1	4	+	183	4	159255951	five_prime_UTR:1.0;	ENSMUSG00000031309.13	Rps6ka3	chrX	protein_coding	ribosomal protein S6 kinase polypeptide 3
chrX	152272713	152273029	chrX_11149_IP1	6	+	317	4	152272959	CDS:1.0;	ENSMUSG00000025332.12	Kdm5c	chrX	protein_coding	lysine (K)-specific demethylase 5C
chrX	101640217	101640322	chrX_10209_IP1	7	+	106	7	101640320	five_prime_UTR:0.65;CDS:0.35;	ENSMUSG00000034160.11	Ogt	chrX	protein_coding	O-linked N-acetylglucosamine (GlcNAc) transferase (UDP-N-acetylglucosamine:polypeptide-N-acetylglucosaminyl transferase)
chrX	106347029	106347178	chrX_10326_IP1	4	+	150	4	106347075	intergenic;	--
chrX	19624460	19624742	chrX_8955_IP1	3	+	283	3	19624596	intergenic;	--
chrX	165428579	165428731	chrX_13917_IP1	4	-	153	4	165428584	intergenic;	--
chrX	74239098	74239242	chrX_12435_IP1	6	-	145	6	74239129	CDS:1.0;	ENSMUSG00000031328.13	Flna	chrX	protein_coding	filamin, alpha
chrX	18163052	18163172	chrX_8942_IP1	5	+	121	5	18163121	CDS:1.0;	ENSMUSG00000037369.14	Kdm6a	chrX	protein_coding	lysine (K)-specific demethylase 6A
chrX	45485385	45485553	chrX_9253_IP1	3	+	169	3	45485406	intergenic;	--
chrX	7874496	7874809	chrX_8769_IP1	8	+	314	7	7874629	three_prime_UTR:1.0;	ENSMUSG00000031154.13	Otud5	chrX	protein_coding	OTU domain containing 5
chrX	132224807	132225027	chrX_13401_IP1	4	-	221	4	132224885	intergenic;	--
chrX	84126936	84127131	chrX_12591_IP1	3	-	196	3	84126984	antisense;	ENSMUSG00000045103.15	Dmd	chrX	protein_coding	dystrophin, muscular dystrophy
chrX	120533873	120534129	chrX_10600_IP1	3	+	257	3	120533982	intron:1.0;	ENSMUSG00000034755.16	Pcdh11x	chrX	protein_coding	protocadherin 11 X-linked
chrX	139235152	139235407	chrX_10865_IP1	3	+	256	3	139235261	CDS:1.0;	ENSMUSG00000042515.11	Mum1l1	chrX	protein_coding	melanoma associated antigen (mutated) 1-like 1
chrX	52582867	52582958	chrX_12043_IP1	3	-	92	3	52582935	CDS:1.0;	ENSMUSG00000055653.11	Gpc3	chrX	protein_coding	glypican 3
chrX	156835490	156835724	chrX_13796_IP1	3	-	235	3	156835578	intergenic;	--
chrX	104104831	104105077	chrX_12926_IP1	4	-	247	4	104104930	intron:1.0;	ENSMUSG00000046449.13	C77370	chrX	protein_coding	expressed sequence C77370
chrX	141612420	141612611	chrX_10920_IP1	7	+	192	5	141612420	CDS:1.0;	ENSMUSG00000031274.14	Col4a5	chrX	protein_coding	collagen, type IV, alpha 5
chrX	12079893	12080235	chrX_11536_IP1	14	-	343	11	12080110	intron:1.0;	ENSMUSG00000040363.12	Bcor	chrX	protein_coding	BCL6 interacting corepressor
chrX	16217231	16217382	chrX_8924_IP1	3	+	152	3	16217235	intergenic;	--
chrX	137647546	137647698	chrX_13482_IP1	3	-	153	3	137647551	antisense;	ENSMUSG00000059203.8	Il1rapl2	chrX	protein_coding	interleukin 1 receptor accessory protein-like 2
chrX	7521052	7521197	chrX_11438_IP1	3	-	146	3	7521055	intergenic;	--
chrX	84731872	84732038	chrX_9873_IP1	3	+	167	3	84731891	intron:1.0;	ENSMUSG00000045103.15	Dmd	chrX	protein_coding	dystrophin, muscular dystrophy
chrX	20859983	20860223	chrX_9013_IP1	4	+	241	3	20859994	three_prime_UTR:0.46;CDS:0.54;	ENSMUSG00000001127.10	Araf	chrX	protein_coding	v-raf murine sarcoma 3611 viral oncogene homolog
chrX	8144374	8144492	chrX_11480_IP1	6	-	119	6	8144390	intron:1.0;	ENSMUSG00000031167.14	Rbm3	chrX	protein_coding	RNA binding motif protein 3
chrX	98536687	98536884	chrX_10134_IP1	3	+	198	3	98536737	intergenic;	--
chrX	103979319	103979334	chrX_12921_IP1	4	-	16	4	103979322	five_prime_UTR:1.0;	ENSMUSG00000056537.9	Rlim	chrX	protein_coding	ring finger protein, LIM domain interacting
chrX	84887535	84887716	chrX_12604_IP1	3	-	182	3	84887569	antisense;	ENSMUSG00000045103.15	Dmd	chrX	protein_coding	dystrophin, muscular dystrophy
chrX	162760466	162760595	chrX_13869_IP1	4	-	130	4	162760536	antisense;	ENSMUSG00000031353.11	Rbbp7	chrX	protein_coding	retinoblastoma binding protein 7
chrX	170011057	170011169	chrX_13987_IP1	17	-	113	13	170011091	antisense;	ENSMUSG00000095562.5	Gm21887	chrX	protein_coding	predicted gene, 21887
chrX	105802154	105802408	chrX_12956_IP1	3	-	255	3	105802262	intron:1.0;	ENSMUSG00000031229.14	Atrx	chrX	protein_coding	alpha thalassemia/mental retardation syndrome X-linked homolog (human)
chrX	53056997	53057180	chrX_12054_IP1	8	-	184	5	53057121	noncoding_exon:0.89;intron:0.11;	ENSMUSG00000087365.5	C430049B03Rik	chrX	processed_transcript	RIKEN cDNA C430049B03 gene
chrX	75484673	75484900	chrX_12467_IP1	4	-	228	4	75484804	antisense;	ENSMUSG00000083093.1	Gm15385	chrX	unprocessed_pseudogene	predicted gene 15385
chrX	73659264	73659292	chrX_9626_IP1	4	+	29	4	73659266	antisense;	ENSMUSG00000002012.11	Pnck	chrX	protein_coding	pregnancy upregulated non-ubiquitously expressed CaM kinase
chrX	81584989	81585184	chrX_9817_IP1	3	+	196	3	81585038	intergenic;	--
chrX	20662956	20663055	chrX_11662_IP1	4	-	100	4	20662994	antisense;	ENSMUSG00000001924.13	Uba1	chrX	protein_coding	ubiquitin-like modifier activating enzyme 1
chrX	77511119	77511355	chrX_9741_IP1	6	+	237	4	77511179	five_prime_UTR:0.64;intron:0.36;	ENSMUSG00000025246.11	Tbl1x	chrX	protein_coding	transducin (beta)-like 1 X-linked
chrX	60403081	60403262	chrX_12132_IP1	3	-	182	3	60403117	intron:1.0;	ENSMUSG00000062949.11	Atp11c	chrX	protein_coding	ATPase, class VI, type 11C
chrX	55866303	55866574	chrX_12077_IP1	3	-	272	3	55866428	antisense;	ENSMUSG00000083249.1	Gm14623	chrX	unprocessed_pseudogene	predicted gene 14623
chrX	73457988	73458089	chrX_12341_IP1	3	-	102	3	73457991	CDS:1.0;	ENSMUSG00000031371.12	Haus7	chrX	protein_coding	HAUS augmin-like complex, subunit 7
chrX	133300889	133301046	chrX_13418_IP1	3	-	158	3	133300900	intergenic;	--
chrX	169210182	169210340	chrX_11369_IP1	3	+	159	3	169210193	intron:1.0;	ENSMUSG00000031355.14	Arhgap6	chrX	protein_coding	Rho GTPase activating protein 6
chrX	122651262	122651522	chrX_10640_IP1	3	+	261	3	122651375	intergenic;	--
chrX	95807986	95808159	chrX_10076_IP1	3	+	174	3	95808023	intergenic;	--
chrX	151924671	151924761	chrX_11117_IP1	4	+	91	4	151924751	CDS:1.0;	ENSMUSG00000025261.15	Huwe1	chrX	protein_coding	HECT, UBA and WWE domain containing 1
chrX	118221965	118222152	chrX_10553_IP1	3	+	188	3	118222005	intergenic;	--
chrX	13071682	13071862	chrX_11558_IP1	4	-	181	4	13071767	antisense;	ENSMUSG00000031010.15	Usp9x	chrX	protein_coding	ubiquitin specific peptidase 9, X chromosome
chrX	146545367	146545518	chrX_11016_IP1	3	+	152	3	146545371	intergenic;	--
chrX	159627408	159627643	chrX_11257_IP1	4	+	236	4	159627496	five_prime_UTR:0.44;intron:0.56;	ENSMUSG00000040990.15	Sh3kbp1	chrX	protein_coding	SH3-domain kinase binding protein 1
chrX	169993988	169994134	chrX_13982_IP1	6	-	147	6	169994022	antisense;	ENSMUSG00000035299.14	Mid1	chrX	protein_coding	midline 1
chrX	105131684	105131835	chrX_10275_IP1	3	+	152	3	105131688	intergenic;	--
chrX	79990680	79990851	chrX_9785_IP1	3	+	172	3	79990705	intergenic;	--
chrX	141611174	141611245	chrX_10919_IP1	5	+	72	5	141611223	CDS:1.0;	ENSMUSG00000031274.14	Col4a5	chrX	protein_coding	collagen, type IV, alpha 5
chrX	151898443	151898575	chrX_11098_IP1	4	+	133	4	151898443	CDS:1.0;	ENSMUSG00000025261.15	Huwe1	chrX	protein_coding	HECT, UBA and WWE domain containing 1
chrX	139913415	139913592	chrX_10875_IP1	3	+	178	3	139913445	antisense;	ENSMUSG00000031433.13	Rbm41	chrX	protein_coding	RNA binding motif protein 41
chrX	7901485	7901596	chrX_8782_IP1	4	+	112	4	7901492	intron:1.0;	ENSMUSG00000031158.9	Timm17b	chrX	protein_coding	translocase of inner mitochondrial membrane 17b
chrX	94235220	94235349	chrX_10050_IP1	6	+	130	6	94235220	five_prime_UTR:1.0;	ENSMUSG00000043929.14	Klhl15	chrX	protein_coding	kelch-like 15
chrX	99136607	99136850	chrX_10138_IP1	8	+	244	8	99136716	five_prime_UTR:1.0;	ENSMUSG00000031217.8	Efnb1	chrX	protein_coding	ephrin B1
chrX	122508914	122509201	chrX_10639_IP1	3	+	288	3	122509057	intergenic;	--
chrX	93831945	93832103	chrX_12753_IP1	10	-	159	10	93831988	five_prime_UTR:0.96;CDS:0.04;	ENSMUSG00000035232.8	Pdk3	chrX	protein_coding	pyruvate dehydrogenase kinase, isoenzyme 3
chrX	120892624	120892847	chrX_13248_IP1	4	-	224	4	120892701	antisense;	ENSMUSG00000034755.16	Pcdh11x	chrX	protein_coding	protocadherin 11 X-linked
chrX	95956777	95956882	chrX_12802_IP1	3	-	106	3	95956779	five_prime_UTR:0.32;CDS:0.68;	ENSMUSG00000057421.10	Las1l	chrX	protein_coding	LAS1-like (S. cerevisiae)
chrX	66730787	66730977	chrX_12236_IP1	3	-	191	3	66730830	intergenic;	--
chrX	68161018	68161167	chrX_9539_IP1	3	+	150	3	68161024	intergenic;	--
chrX	166937603	166937775	chrX_13931_IP1	3	-	173	3	166937629	intergenic;	--
chrX	155304059	155304263	chrX_13772_IP1	3	-	205	3	155304116	noncoding_exon:0.32;intron:0.68;	ENSMUSG00000052157.4	Gm650	chrX	processed_pseudogene	predicted pseudogene 650
chrX	116203353	116203502	chrX_13152_IP1	3	-	150	3	116203360	intergenic;	--
chrX	62490363	62490493	chrX_9461_IP1	3	+	131	3	62490366	intergenic;	--
chrX	141187758	141187846	chrX_13552_IP1	6	-	89	6	141187794	CDS:1.0;	ENSMUSG00000031273.14	Col4a6	chrX	protein_coding	collagen, type IV, alpha 6
chrX	81062300	81062554	chrX_9807_IP1	3	+	255	3	81062407	intergenic;	--
chrX	103965251	103965398	chrX_12918_IP1	4	-	148	4	103965326	CDS:0.56;intron:0.44;	ENSMUSG00000056537.9	Rlim	chrX	protein_coding	ring finger protein, LIM domain interacting
chrX	137424539	137424687	chrX_10844_IP1	3	+	149	3	137424541	intergenic;	--
chrX	122846180	122846455	chrX_13281_IP1	3	-	276	3	122846308	intergenic;	--
chrX	56609956	56610146	chrX_9382_IP1	4	+	191	4	56609999	CDS:1.0;	ENSMUSG00000060681.12	Slc9a6	chrX	protein_coding	solute carrier family 9 (sodium/hydrogen exchanger), member 6
chrX	42476289	42476468	chrX_11853_IP1	4	-	180	4	42476321	intergenic;	--
chrX	118693643	118693859	chrX_10561_IP1	3	+	217	3	118693712	intergenic;	--
chrX	130160119	130160361	chrX_10734_IP1	4	+	243	4	130160216	intron:1.0;	ENSMUSG00000034480.16	Diap2	chrX	protein_coding	diaphanous homolog 2 (Drosophila)
chrX	146953128	146953212	chrX_11029_IP1	3	+	85	3	146953131	intergenic;	--
chrX	118402203	118402383	chrX_13199_IP1	3	-	181	3	118402237	intergenic;	--
chrX	92565517	92565716	chrX_10021_IP1	3	+	200	3	92565569	antisense;	ENSMUSG00000067649.3	Mageb18	chrX	protein_coding	melanoma antigen family B, 18
chrX	43106516	43106727	chrX_11867_IP1	3	-	212	3	43106581	intron:1.0;	ENSMUSG00000016150.13	Tenm1	chrX	protein_coding	teneurin transmembrane protein 1
chrX	43722234	43722461	chrX_9212_IP1	3	+	228	3	43722314	intergenic;	--
chrX	109621077	109621253	chrX_10392_IP1	4	+	177	4	109621132	intergenic;	--
chrX	7885748	7885903	chrX_8774_IP1	5	+	156	4	7885748	CDS:1.0;	ENSMUSG00000031156.15	Slc35a2	chrX	protein_coding	solute carrier family 35 (UDP-galactose transporter), member A2
chrX	117278818	117279154	chrX_10539_IP1	4	+	337	3	117278931	intergenic;	--
chrX	42366571	42366867	chrX_9185_IP1	4	+	297	3	42366605	intergenic;	--
chrX	59017280	59017499	chrX_9419_IP1	3	+	220	3	59017352	intergenic;	--
chrX	21536929	21537087	chrX_9030_IP1	4	+	159	4	21536945	intergenic;	--
chrX	66811725	66812062	chrX_9518_IP1	5	+	338	4	66811824	intergenic;	--
chrX	130136579	130136788	chrX_13375_IP1	3	-	210	3	130136644	antisense;	ENSMUSG00000034480.16	Diap2	chrX	protein_coding	diaphanous homolog 2 (Drosophila)
chrX	75130726	75130864	chrX_12460_IP1	4	-	139	4	75130744	five_prime_UTR:0.28;CDS:0.72;	ENSMUSG00000031402.10	Mpp1	chrX	protein_coding	membrane protein, palmitoylated
chrX	20668448	20668565	chrX_8977_IP1	6	+	118	5	20668514	CDS:1.0;	ENSMUSG00000001924.13	Uba1	chrX	protein_coding	ubiquitin-like modifier activating enzyme 1
chrX	137366726	137366896	chrX_13479_IP1	6	-	171	6	137366754	intergenic;	--
chrX	151897212	151897253	chrX_11097_IP1	4	+	42	4	151897238	CDS:1.0;	ENSMUSG00000025261.15	Huwe1	chrX	protein_coding	HECT, UBA and WWE domain containing 1
chrX	119352189	119352349	chrX_13210_IP1	3	-	161	3	119352202	intergenic;	--
chrX	64063679	64063914	chrX_9487_IP1	3	+	236	3	64063768	intergenic;	--
chrX	151067096	151067221	chrX_11056_IP1	4	+	126	4	151067100	CDS:1.0;	ENSMUSG00000025265.12	Fgd1	chrX	protein_coding	FYVE, RhoGEF and PH domain containing 1
chrX	48578379	48578529	chrX_11968_IP1	3	-	151	3	48578443	CDS:1.0;	ENSMUSG00000036916.11	Zfp280c	chrX	protein_coding	zinc finger protein 280C
chrX	85574039	85574159	chrX_9881_IP1	4	+	121	4	85574044	five_prime_UTR:1.0;	ENSMUSG00000035476.7	Tab3	chrX	protein_coding	TGF-beta activated kinase 1/MAP3K7 binding protein 3
chrX	116130732	116130868	chrX_10511_IP1	3	+	137	3	116130735	intergenic;	--
chrX	71556228	71556495	chrX_9591_IP1	6	+	268	6	71556348	intron:1.0;	ENSMUSG00000015217.9	Hmgb3	chrX	protein_coding	high mobility group box 3
chrX	94235090	94235125	chrX_10048_IP1	6	+	36	6	94235112	five_prime_UTR:1.0;	ENSMUSG00000043929.14	Klhl15	chrX	protein_coding	kelch-like 15
chrX	98275260	98275471	chrX_10125_IP1	5	+	212	5	98275327	intron:1.0;	ENSMUSG00000046532.7	Ar	chrX	protein_coding	androgen receptor
chrX	38689933	38690186	chrX_11777_IP1	4	-	254	4	38690040	intergenic;	--
chrX	7573611	7573875	chrX_11440_IP1	6	-	265	4	7573706	CDS:1.0;	ENSMUSG00000039556.14	Ppp1r3f	chrX	protein_coding	protein phosphatase 1, regulatory (inhibitor) subunit 3F
chrX	139716268	139716474	chrX_13521_IP1	3	-	207	3	139716327	antisense;	ENSMUSG00000042473.8	Tbc1d8b	chrX	protein_coding	TBC1 domain family, member 8B
chrX	92656673	92656812	chrX_12724_IP1	3	-	140	3	92656676	intergenic;	--
chrX	23310784	23310949	chrX_9053_IP1	3	+	166	3	23310802	antisense;	ENSMUSG00000036782.11	Klhl13	chrX	protein_coding	kelch-like 13
chrX	106342243	106342466	chrX_10324_IP1	4	+	224	4	106342381	intergenic;	--
chrX	29618313	29618453	chrX_11719_IP1	3	-	141	3	29618316	intergenic;	--
chrX	56754334	56754391	chrX_9385_IP1	5	+	58	4	56754334	five_prime_UTR:1.0;	ENSMUSG00000023092.14	Fhl1	chrX	protein_coding	four and a half LIM domains 1
chrX	138080423	138080593	chrX_13486_IP1	4	-	171	4	138080447	antisense;	ENSMUSG00000059203.8	Il1rapl2	chrX	protein_coding	interleukin 1 receptor accessory protein-like 2
chrX	42148746	42148966	chrX_11847_IP1	4	-	221	4	42148819	intron:1.0;	ENSMUSG00000104042.1	Gm37564	chrX	TEC	predicted gene, 37564
chrX	154200842	154201056	chrX_11179_IP1	3	+	215	3	154200909	intergenic;	--
chrX	104507624	104507748	chrX_10257_IP1	3	+	125	3	104507627	intergenic;	--
chrX	73659257	73659292	chrX_12344_IP1	6	-	36	6	73659266	intron:1.0;	ENSMUSG00000002012.11	Pnck	chrX	protein_coding	pregnancy upregulated non-ubiquitously expressed CaM kinase
chrX	153326889	153327074	chrX_13744_IP1	3	-	186	3	153326927	antisense;	ENSMUSG00000041649.11	Klf8	chrX	protein_coding	Kruppel-like factor 8
chrX	164883498	164883675	chrX_11320_IP1	3	+	178	3	164883528	intergenic;	--
chrX	79391002	79391217	chrX_12511_IP1	3	-	216	3	79391071	intron:1.0;	ENSMUSG00000073077.4	Gm7173	chrX	protein_coding	predicted gene 7173
chrX	13105521	13105664	chrX_8864_IP1	5	+	144	5	13105524	intron:1.0;	ENSMUSG00000031010.15	Usp9x	chrX	protein_coding	ubiquitin specific peptidase 9, X chromosome
chrX	17513673	17513798	chrX_11614_IP1	3	-	126	3	17513677	intergenic;	--
chrX	101642975	101643105	chrX_10212_IP1	7	+	131	7	101643005	CDS:1.0;	ENSMUSG00000034160.11	Ogt	chrX	protein_coding	O-linked N-acetylglucosamine (GlcNAc) transferase (UDP-N-acetylglucosamine:polypeptide-N-acetylglucosaminyl transferase)
chrX	88228025	88228224	chrX_9943_IP1	3	+	200	3	88228078	intergenic;	--
chrX	165822982	165823282	chrX_13919_IP1	5	-	301	3	165823053	intergenic;	--
chrX	151917550	151917653	chrX_11110_IP1	7	+	104	6	151917620	CDS:1.0;	ENSMUSG00000025261.15	Huwe1	chrX	protein_coding	HECT, UBA and WWE domain containing 1
chrX	104082146	104082374	chrX_12925_IP1	3	-	229	3	104082227	three_prime_UTR:1.0;	ENSMUSG00000046449.13	C77370	chrX	protein_coding	expressed sequence C77370
chrX	152204183	152204249	chrX_11138_IP1	4	+	67	4	152204215	CDS:1.0;	ENSMUSG00000041115.14	Iqsec2	chrX	protein_coding	IQ motif and Sec7 domain 2
chrX	121651224	121651389	chrX_13259_IP1	3	-	166	3	121651246	intergenic;	--
chrX	36329200	36329325	chrX_9093_IP1	4	+	126	4	36329280	CDS:1.0;	ENSMUSG00000016239.9	Lonrf3	chrX	protein_coding	LON peptidase N-terminal domain and ring finger 3
chrX	64277029	64277047	chrX_9488_IP1	3	+	19	3	64277030	intergenic;	--
chrX	133280173	133280325	chrX_13417_IP1	4	-	153	4	133280178	intergenic;	--
chrX	8074263	8074410	chrX_11475_IP1	4	-	148	4	8074306	intron:1.0;	ENSMUSG00000039231.16	Suv39h1	chrX	protein_coding	suppressor of variegation 3-9 homolog 1 (Drosophila)
chrX	152144227	152144566	chrX_11133_IP1	13	+	340	10	152144330	five_prime_UTR:0.59;CDS:0.28;intron:0.13;	ENSMUSG00000041115.14	Iqsec2	chrX	protein_coding	IQ motif and Sec7 domain 2
chrX	74334224	74334265	chrX_9688_IP1	4	+	42	4	74334224	CDS:1.0;	ENSMUSG00000031398.11	Plxna3	chrX	protein_coding	plexin A3
chrX	74333003	74333102	chrX_9686_IP1	4	+	100	4	74333015	CDS:1.0;	ENSMUSG00000031398.11	Plxna3	chrX	protein_coding	plexin A3
chrX	161255964	161256139	chrX_11281_IP1	3	+	176	3	161255995	intron:1.0;	ENSMUSG00000000037.14	Scml2	chrX	protein_coding	sex comb on midleg-like 2 (Drosophila)
chrX	140304693	140304778	chrX_10878_IP1	3	+	86	3	140304696	intergenic;	--
chrX	85991098	85991354	chrX_12615_IP1	3	-	257	3	85991208	intergenic;	--
chrX	49405607	49405820	chrX_9317_IP1	3	+	214	3	49405673	antisense;	ENSMUSG00000086948.1	Gm14697	chrX	antisense	predicted gene 14697
chrX	133688725	133688943	chrX_13434_IP1	6	-	219	4	133688793	five_prime_UTR:1.0;	ENSMUSG00000051323.14	Pcdh19	chrX	protein_coding	protocadherin 19
chrX	153726388	153726610	chrX_13753_IP1	3	-	223	3	153726463	antisense;	ENSMUSG00000086316.5	2210013O21Rik	chrX	processed_transcript	RIKEN cDNA 2210013O21 gene
chrX	94759495	94759774	chrX_10059_IP1	3	+	280	3	94759632	intergenic;	--
chrX	83787992	83788137	chrX_9852_IP1	3	+	146	3	83787995	intron:1.0;	ENSMUSG00000045103.15	Dmd	chrX	protein_coding	dystrophin, muscular dystrophy
chrX	59395396	59395622	chrX_12118_IP1	4	-	227	4	59395476	intron:1.0;	ENSMUSG00000031137.15	Fgf13	chrX	protein_coding	fibroblast growth factor 13
chrX	102328282	102328497	chrX_12901_IP1	3	-	216	3	102328350	intron:1.0;	ENSMUSG00000067567.10	Hdac8	chrX	protein_coding	histone deacetylase 8
chrX	112380628	112380752	chrX_10436_IP1	4	+	125	4	112380638	intergenic;	--
chrX	66448294	66448410	chrX_12231_IP1	3	-	117	3	66448297	antisense;	ENSMUSG00000089398.1	Gm23028	chrX	misc_RNA	predicted gene, 23028
chrX	60404145	60404268	chrX_12135_IP1	4	-	124	4	60404205	intron:1.0;	ENSMUSG00000062949.11	Atp11c	chrX	protein_coding	ATPase, class VI, type 11C
chrX	25946523	25946675	chrX_9064_IP1	4	+	153	4	25946529	antisense;	ENSMUSG00000086959.1	E330010L02Rik	chrX	lincRNA	RIKEN cDNA E330010L02 gene
chrX	39023744	39023842	chrX_11782_IP1	3	-	99	3	39023747	intergenic;	--
chrX	120454120	120454279	chrX_13232_IP1	4	-	160	4	120454137	antisense;	ENSMUSG00000034755.16	Pcdh11x	chrX	protein_coding	protocadherin 11 X-linked
chrX	73949456	73949647	chrX_12381_IP1	5	-	192	5	73949500	CDS:1.0;	ENSMUSG00000031386.12	Hcfc1	chrX	protein_coding	host cell factor C1
chrX	7726197	7726220	chrX_8743_IP1	4	+	24	4	7726197	CDS:1.0;	ENSMUSG00000039382.9	Wdr45	chrX	protein_coding	WD repeat domain 45
chrX	160929640	160929852	chrX_11278_IP1	4	+	213	4	160929707	antisense;	ENSMUSG00000031292.12	Cdkl5	chrX	protein_coding	cyclin-dependent kinase-like 5
chrX	74227490	74227757	chrX_12412_IP1	16	-	268	9	74227563	CDS:1.0;	ENSMUSG00000031328.13	Flna	chrX	protein_coding	filamin, alpha
chrX	115484468	115484621	chrX_10502_IP1	3	+	154	3	115484474	intergenic;	--
chrX	107366220	107366445	chrX_10357_IP1	3	+	226	3	107366298	intergenic;	--
chrX	43106516	43106798	chrX_9204_IP1	4	+	283	4	43106651	antisense;	ENSMUSG00000016150.13	Tenm1	chrX	protein_coding	teneurin transmembrane protein 1
chrX	95052397	95052583	chrX_12787_IP1	3	-	187	3	95052439	intron:1.0;	ENSMUSG00000025656.15	Arhgef9	chrX	protein_coding	CDC42 guanine nucleotide exchange factor (GEF) 9
chrX	152223141	152223276	chrX_11142_IP1	4	+	136	4	152223169	three_prime_UTR:1.0;	ENSMUSG00000041115.14	Iqsec2	chrX	protein_coding	IQ motif and Sec7 domain 2
chrX	43727263	43727439	chrX_9213_IP1	3	+	177	3	43727292	intergenic;	--
chrX	36328423	36328565	chrX_9092_IP1	4	+	143	4	36328430	five_prime_UTR:1.0;	ENSMUSG00000016239.9	Lonrf3	chrX	protein_coding	LON peptidase N-terminal domain and ring finger 3
chrX	127095142	127095347	chrX_13324_IP1	3	-	206	3	127095201	intergenic;	--
chrX	8175756	8175879	chrX_8788_IP1	4	+	124	4	8175764	antisense;	ENSMUSG00000039201.7	Tbc1d25	chrX	protein_coding	TBC1 domain family, member 25
chrX	101222438	101222532	chrX_12875_IP1	4	-	95	4	101222445	five_prime_UTR:1.0;	ENSMUSG00000046032.14	Snx12	chrX	protein_coding	sorting nexin 12
chrX	73673420	73673560	chrX_12345_IP1	6	-	141	6	73673459	antisense;	ENSMUSG00000019558.12	Slc6a8	chrX	protein_coding	solute carrier family 6 (neurotransmitter transporter, creatine), member 8
chrX	93086221	93086375	chrX_10032_IP1	3	+	155	3	93086228	intergenic;	--
chrX	71433776	71433926	chrX_9590_IP1	3	+	151	3	71433779	antisense;	ENSMUSG00000035776.12	Cd99l2	chrX	protein_coding	CD99 antigen-like 2
chrX	157598317	157598514	chrX_13816_IP1	6	-	198	4	157598363	CDS:0.1;intron:0.9;	ENSMUSG00000046873.16	Mbtps2	chrX	protein_coding	membrane-bound transcription factor peptidase, site 2
chrX	73458834	73458848	chrX_12342_IP1	3	-	15	3	73458834	CDS:1.0;	ENSMUSG00000031371.12	Haus7	chrX	protein_coding	HAUS augmin-like complex, subunit 7
chrX	56787988	56788170	chrX_9386_IP1	5	+	183	3	56787988	five_prime_UTR:0.14;CDS:0.86;	ENSMUSG00000023092.14	Fhl1	chrX	protein_coding	four and a half LIM domains 1
chrX	94539123	94539246	chrX_12780_IP1	8	-	124	8	94539166	CDS:1.0;	ENSMUSG00000025151.14	Maged1	chrX	protein_coding	melanoma antigen, family D, 1
chrX	157251870	157252028	chrX_13803_IP1	3	-	159	3	157251881	intron:1.0;	ENSMUSG00000057457.9	Phex	chrX	protein_coding	phosphate regulating endopeptidase homolog, X-linked
chrX	130010174	130010332	chrX_13369_IP1	3	-	159	3	130010186	antisense;	ENSMUSG00000034480.16	Diap2	chrX	protein_coding	diaphanous homolog 2 (Drosophila)
chrX	97241832	97241976	chrX_10110_IP1	4	+	145	4	97241835	intergenic;	--
chrX	5575052	5575277	chrX_11408_IP1	3	-	226	3	5575130	intergenic;	--
chrX	12375869	12375974	chrX_11549_IP1	3	-	106	3	12375872	intergenic;	--
chrX	141599678	141599757	chrX_10915_IP1	6	+	80	6	141599678	CDS:1.0;	ENSMUSG00000031274.14	Col4a5	chrX	protein_coding	collagen, type IV, alpha 5
chrX	20060546	20060686	chrX_8958_IP1	4	+	141	4	20060603	CDS:1.0;	ENSMUSG00000037347.7	Chst7	chrX	protein_coding	carbohydrate (N-acetylglucosamino) sulfotransferase 7
chrX	65129802	65129951	chrX_12204_IP1	4	-	150	4	65129805	intergenic;	--
chrX	93527628	93527881	chrX_12738_IP1	7	-	254	5	93527793	intron:1.0;	ENSMUSG00000006678.6	Pola1	chrX	protein_coding	polymerase (DNA directed), alpha 1
chrX	41806644	41806714	chrX_11838_IP1	3	-	71	3	41806696	CDS:1.0;	ENSMUSG00000037475.13	Thoc2	chrX	protein_coding	THO complex 2
chrX	89729194	89729358	chrX_12688_IP1	4	-	165	4	89729243	intergenic;	--
chrX	117532573	117532753	chrX_13174_IP1	3	-	181	3	117532607	intergenic;	--
chrX	170011031	170011053	chrX_13986_IP1	10	-	23	10	170011051	antisense;	ENSMUSG00000095562.5	Gm21887	chrX	protein_coding	predicted gene, 21887
chrX	116124448	116124713	chrX_10510_IP1	3	+	266	3	116124566	intergenic;	--
chrX	18162670	18162811	chrX_8940_IP1	4	+	142	4	18162696	five_prime_UTR:1.0;	ENSMUSG00000037369.14	Kdm6a	chrX	protein_coding	lysine (K)-specific demethylase 6A
chrX	113411478	113411686	chrX_10457_IP1	3	+	209	3	113411543	intron:1.0;	ENSMUSG00000025592.15	Dach2	chrX	protein_coding	dachshund 2 (Drosophila)
chrX	111453132	111453323	chrX_10419_IP1	3	+	192	3	111453176	antisense;	ENSMUSG00000025665.14	Rps6ka6	chrX	protein_coding	ribosomal protein S6 kinase polypeptide 6
chrX	118992080	118992301	chrX_10570_IP1	3	+	222	3	118992154	intergenic;	--
chrX	151200143	151200295	chrX_11062_IP1	3	+	153	3	151200148	intron:1.0;	ENSMUSG00000041245.11	Wnk3	chrX	protein_coding	WNK lysine deficient protein kinase 3
chrX	141175333	141175399	chrX_13551_IP1	4	-	67	4	141175333	CDS:1.0;	ENSMUSG00000031273.14	Col4a6	chrX	protein_coding	collagen, type IV, alpha 6
chrX	140598471	140598558	chrX_13537_IP1	3	-	88	3	140598489	five_prime_UTR:1.0;	ENSMUSG00000031431.11	Tsc22d3	chrX	protein_coding	TSC22 domain family, member 3
chrX	80901634	80901773	chrX_9804_IP1	4	+	140	4	80901637	intergenic;	--
chrX	93587222	93587502	chrX_12747_IP1	3	-	281	3	93587356	intron:1.0;	ENSMUSG00000006678.6	Pola1	chrX	protein_coding	polymerase (DNA directed), alpha 1
chrX	48452983	48453376	chrX_11961_IP1	17	-	394	15	48453229	intron:1.0;	ENSMUSG00000031103.10	Elf4	chrX	protein_coding	E74-like factor 4 (ets domain transcription factor)
chrX	151918820	151919003	chrX_11113_IP1	4	+	184	4	151918888	CDS:0.58;intron:0.42;	ENSMUSG00000025261.15	Huwe1	chrX	protein_coding	HECT, UBA and WWE domain containing 1
chrX	101913756	101914016	chrX_10229_IP1	3	+	261	3	101913869	intron:1.0;	ENSMUSG00000079481.9	Nhsl2	chrX	protein_coding	NHS-like 2
chrX	56731764	56731868	chrX_9384_IP1	4	+	105	4	56731824	five_prime_UTR:0.79;intron:0.21;	ENSMUSG00000023092.14	Fhl1	chrX	protein_coding	four and a half LIM domains 1
chrX	48369602	48369717	chrX_9302_IP1	3	+	116	3	48369605	CDS:1.0;	ENSMUSG00000036959.13	Bcorl1	chrX	protein_coding	BCL6 co-repressor-like 1
chrX	138593814	138593976	chrX_13500_IP1	3	-	163	3	138593829	antisense;	ENSMUSG00000059203.8	Il1rapl2	chrX	protein_coding	interleukin 1 receptor accessory protein-like 2
chrX	138593282	138593624	chrX_13499_IP1	4	-	343	3	138593371	antisense;	ENSMUSG00000059203.8	Il1rapl2	chrX	protein_coding	interleukin 1 receptor accessory protein-like 2
chrX	123103787	123103830	chrX_10648_IP1	10	+	44	10	123103796	intron:1.0;	ENSMUSG00000079450.9	Cldn34c1	chrX	protein_coding	claudin 34C1
chrX	139445500	139445779	chrX_13517_IP1	4	-	280	3	139445632	intergenic;	--
chrX	49019548	49019718	chrX_11975_IP1	4	-	171	4	49019571	intron:1.0;	ENSMUSG00000031109.14	Enox2	chrX	protein_coding	ecto-NOX disulfide-thiol exchanger 2
chrX	42727396	42727673	chrX_11858_IP1	4	-	278	3	42727416	intron:1.0;	ENSMUSG00000016150.13	Tenm1	chrX	protein_coding	teneurin transmembrane protein 1
chrX	145704288	145704509	chrX_13636_IP1	3	-	222	3	145704363	intergenic;	--
chrX	92830233	92830455	chrX_10027_IP1	4	+	223	4	92830339	intergenic;	--
chrX	142965951	142966071	chrX_13600_IP1	4	-	121	4	142965966	intron:1.0;	ENSMUSG00000042225.3	Ammecr1	chrX	protein_coding	Alport syndrome, mental retardation, midface hypoplasia and elliptocytosis chromosomal region gene 1
chrX	99148598	99148999	chrX_10139_IP1	14	+	402	10	99148742	three_prime_UTR:0.98;intron:0.02;	ENSMUSG00000031217.8	Efnb1	chrX	protein_coding	ephrin B1
chrX	162927869	162928067	chrX_11300_IP1	3	+	199	3	162927979	intron:1.0;	ENSMUSG00000031360.12	Ctps2	chrX	protein_coding	cytidine 5'-triphosphate synthase 2
chrX	121386624	121386739	chrX_13254_IP1	3	-	116	3	121386627	intergenic;	--
chrX	113430448	113430891	chrX_10458_IP1	6	+	444	3	113430654	intron:1.0;	ENSMUSG00000025592.15	Dach2	chrX	protein_coding	dachshund 2 (Drosophila)
chrX	163336203	163336353	chrX_11307_IP1	3	+	151	3	163336206	intergenic;	--
chrX	120579518	120579762	chrX_10603_IP1	3	+	245	3	120579615	intron:1.0;	ENSMUSG00000034755.16	Pcdh11x	chrX	protein_coding	protocadherin 11 X-linked
chrX	77151645	77151927	chrX_9738_IP1	4	+	283	3	77151753	intergenic;	--
chrX	82945336	82945554	chrX_9834_IP1	5	+	219	5	82945409	intergenic;	--
chrX	141968694	141968975	chrX_13574_IP1	3	-	282	3	141968829	intergenic;	--
chrX	106219708	106219908	chrX_10294_IP1	7	+	201	7	106219761	antisense;	ENSMUSG00000047242.12	Taf9b	chrX	protein_coding	TAF9B RNA polymerase II, TATA box binding protein (TBP)-associated factor
chrX	65232979	65233160	chrX_12207_IP1	3	-	182	3	65233020	intergenic;	--
chrX	112808554	112808716	chrX_10444_IP1	3	+	163	3	112808570	intergenic;	--
chrX	82129525	82129692	chrX_12552_IP1	3	-	168	3	82129548	intergenic;	--
chrX	156199988	156200136	chrX_13789_IP1	3	-	149	3	156199999	antisense;	ENSMUSG00000055109.5	Gm15155	chrX	protein_coding	predicted gene 15155
chrX	123103789	123103823	chrX_13288_IP1	7	-	35	7	123103796	antisense;	ENSMUSG00000079450.9	Cldn34c1	chrX	protein_coding	claudin 34C1
chrX	151927630	151927789	chrX_11118_IP1	6	+	160	5	151927722	CDS:1.0;	ENSMUSG00000025261.15	Huwe1	chrX	protein_coding	HECT, UBA and WWE domain containing 1
chrX	114828531	114828716	chrX_13123_IP1	3	-	186	3	114828572	intergenic;	--
chrX	22214617	22214827	chrX_9041_IP1	4	+	211	4	22214682	intergenic;	--
chrX	63905753	63905994	chrX_12183_IP1	3	-	242	3	63905847	intergenic;	--
chrX	137049708	137049805	chrX_13472_IP1	3	-	98	3	137049711	antisense;	ENSMUSG00000042595.7	Fam199x	chrX	protein_coding	family with sequence similarity 199, X-linked
chrX	141637225	141637315	chrX_10932_IP1	4	+	91	4	141637225	CDS:1.0;	ENSMUSG00000031274.14	Col4a5	chrX	protein_coding	collagen, type IV, alpha 5
chrX	94123274	94123412	chrX_12763_IP1	4	-	139	4	94123291	five_prime_UTR:0.96;intron:0.04;	ENSMUSG00000079509.8	Zfx	chrX	protein_coding	zinc finger protein X-linked
chrX	73947841	73947991	chrX_12378_IP1	6	-	151	6	73947865	CDS:1.0;	ENSMUSG00000031386.12	Hcfc1	chrX	protein_coding	host cell factor C1
chrX	154442988	154443126	chrX_13760_IP1	3	-	139	3	154442991	intergenic;	--
chrX	133687973	133688129	chrX_13433_IP1	8	-	157	8	133688046	five_prime_UTR:1.0;	ENSMUSG00000051323.14	Pcdh19	chrX	protein_coding	protocadherin 19
chrX	95119376	95119498	chrX_10065_IP1	3	+	123	3	95119379	antisense;	ENSMUSG00000025656.15	Arhgef9	chrX	protein_coding	CDC42 guanine nucleotide exchange factor (GEF) 9
chrX	65563727	65563878	chrX_9502_IP1	3	+	152	3	65563731	intergenic;	--
chrX	159372227	159372415	chrX_11252_IP1	8	+	189	6	159372295	five_prime_UTR:0.91;CDS:0.09;	ENSMUSG00000067194.6	Eif1ax	chrX	protein_coding	eukaryotic translation initiation factor 1A, X-linked
chrX	143393918	143394104	chrX_13610_IP1	4	-	187	4	143393957	five_prime_UTR:1.0;	ENSMUSG00000031283.13	Chrdl1	chrX	protein_coding	chordin-like 1
chrX	65600836	65601073	chrX_12211_IP1	3	-	238	3	65600926	intergenic;	--
chrX	53056906	53056997	chrX_9365_IP1	4	+	92	4	53056942	antisense;	ENSMUSG00000087365.5	C430049B03Rik	chrX	processed_transcript	RIKEN cDNA C430049B03 gene
chrX	84719015	84719279	chrX_12603_IP1	3	-	265	3	84719133	antisense;	ENSMUSG00000045103.15	Dmd	chrX	protein_coding	dystrophin, muscular dystrophy
chrX	141666841	141666907	chrX_10945_IP1	4	+	67	4	141666841	CDS:1.0;	ENSMUSG00000031274.14	Col4a5	chrX	protein_coding	collagen, type IV, alpha 5
chrX	111656219	111656404	chrX_10423_IP1	3	+	186	3	111656257	antisense;	ENSMUSG00000034551.10	Hdx	chrX	protein_coding	highly divergent homeobox
chrX	110566837	110567132	chrX_13038_IP1	4	-	296	3	110566985	intergenic;	--
chrX	106349351	106349541	chrX_10329_IP1	4	+	191	4	106349394	intergenic;	--
chrX	6152068	6152216	chrX_8724_IP1	3	+	149	3	6152128	intergenic;	--
chrX	12080344	12080520	chrX_8834_IP1	4	+	177	4	12080373	antisense;	ENSMUSG00000040363.12	Bcor	chrX	protein_coding	BCL6 interacting corepressor
chrX	52613632	52613756	chrX_12044_IP1	3	-	125	3	52613632	CDS:1.0;	ENSMUSG00000055653.11	Gpc3	chrX	protein_coding	glypican 3
chrX	67652267	67652468	chrX_9535_IP1	3	+	202	3	67652321	intergenic;	--
chrX	41807033	41807162	chrX_11839_IP1	3	-	130	3	41807033	CDS:1.0;	ENSMUSG00000037475.13	Thoc2	chrX	protein_coding	THO complex 2
chrX	151918380	151918573	chrX_11111_IP1	6	+	194	5	151918380	CDS:1.0;	ENSMUSG00000025261.15	Huwe1	chrX	protein_coding	HECT, UBA and WWE domain containing 1
chrX	97017801	97017920	chrX_12818_IP1	3	-	120	3	97017804	intergenic;	--
chrX	9200436	9200802	chrX_8795_IP1	6	+	367	4	9200569	CDS:1.0;	ENSMUSG00000047344.9	Lancl3	chrX	protein_coding	LanC lantibiotic synthetase component C-like 3 (bacterial)
chrX	162250659	162250913	chrX_11292_IP1	3	+	255	3	162250771	intergenic;	--
chrX	42068356	42068541	chrX_9164_IP1	4	+	186	4	42068417	five_prime_UTR:0.68;intron:0.32;	ENSMUSG00000025860.12	Xiap	chrX	protein_coding	X-linked inhibitor of apoptosis
chrX	136017965	136018112	chrX_10829_IP1	3	+	148	3	136017968	intergenic;	--
chrX	108743245	108743352	chrX_13008_IP1	4	-	108	4	108743295	CDS:1.0;	ENSMUSG00000063663.9	Brwd3	chrX	protein_coding	bromodomain and WD repeat domain containing 3
chrX	141592047	141592059	chrX_10914_IP1	6	+	13	6	141592058	CDS:1.0;	ENSMUSG00000031274.14	Col4a5	chrX	protein_coding	collagen, type IV, alpha 5
chrX	114521594	114521734	chrX_13114_IP1	3	-	141	3	114521597	antisense;	ENSMUSG00000025597.11	Klhl4	chrX	protein_coding	kelch-like 4
chrX	74226590	74226854	chrX_12409_IP1	6	-	265	6	74226713	intron:1.0;	ENSMUSG00000031328.13	Flna	chrX	protein_coding	filamin, alpha
chrX	118128378	118128572	chrX_13191_IP1	3	-	195	3	118128429	intergenic;	--
chrX	10719092	10719449	chrX_8820_IP1	8	+	358	7	10719200	three_prime_UTR:1.0;	ENSMUSG00000008035.10	Mid1ip1	chrX	protein_coding	Mid1 interacting protein 1 (gastrulation specific G12-like (zebrafish))
chrX	52988447	52988518	chrX_12051_IP1	4	-	72	4	52988498	antisense;	ENSMUSG00000025630.8	Hprt	chrX	protein_coding	hypoxanthine guanine phosphoribosyl transferase
chrX	112173455	112173612	chrX_13075_IP1	3	-	158	3	112173468	intergenic;	--
chrX	16680540	16680690	chrX_8928_IP1	3	+	151	3	16680543	intron:1.0;	ENSMUSG00000025037.6	Maoa	chrX	protein_coding	monoamine oxidase A
chrX	135008967	135009198	chrX_13448_IP1	4	-	232	4	135009054	five_prime_UTR:0.97;CDS:0.03;	ENSMUSG00000052676.14	Zmat1	chrX	protein_coding	zinc finger, matrin type 1
chrX	9132889	9133077	chrX_11499_IP1	3	-	189	3	9132934	intergenic;	--
chrX	119346773	119346847	chrX_10581_IP1	3	+	75	3	119346776	intergenic;	--
chrX	169320127	169320288	chrX_13965_IP1	3	-	162	3	169320144	five_prime_UTR:0.95;intron:0.05;	ENSMUSG00000031352.8	Hccs	chrX	protein_coding	holocytochrome c synthetase
chrX	141660285	141660525	chrX_10942_IP1	4	+	241	4	141660379	intron:1.0;	ENSMUSG00000031274.14	Col4a5	chrX	protein_coding	collagen, type IV, alpha 5
chrX	114559079	114559342	chrX_13117_IP1	3	-	264	3	114559195	antisense;	ENSMUSG00000025597.11	Klhl4	chrX	protein_coding	kelch-like 4
chrX	141653370	141653451	chrX_10937_IP1	4	+	82	4	141653370	CDS:1.0;	ENSMUSG00000031274.14	Col4a5	chrX	protein_coding	collagen, type IV, alpha 5
chrX	21602830	21602998	chrX_11676_IP1	4	-	169	4	21602858	intergenic;	--
chrX	154461917	154462079	chrX_13762_IP1	3	-	163	3	154461934	intergenic;	--
chrX	101260505	101260617	chrX_10185_IP1	4	+	113	4	101260524	three_prime_UTR:1.0;	ENSMUSG00000042903.7	Foxo4	chrX	protein_coding	forkhead box O4
chrX	151344176	151344315	chrX_11070_IP1	3	+	140	3	151344239	five_prime_UTR:0.53;CDS:0.47;	ENSMUSG00000025262.8	Fam120c	chrX	protein_coding	family with sequence similarity 120, member C
chrX	159773594	159773787	chrX_13841_IP1	4	-	194	4	159773640	antisense;	ENSMUSG00000040990.15	Sh3kbp1	chrX	protein_coding	SH3-domain kinase binding protein 1
chrX	112038725	112038863	chrX_13070_IP1	3	-	139	3	112038728	intergenic;	--
chrX	136108383	136108535	chrX_13462_IP1	3	-	153	3	136108388	antisense;	ENSMUSG00000087553.1	5730412P04Rik	chrX	processed_transcript	RIKEN cDNA 5730412P04 gene
chrX	126873768	126873942	chrX_10671_IP1	4	+	175	4	126873808	intergenic;	--
chrX	81946463	81946627	chrX_12548_IP1	4	-	165	4	81946481	intergenic;	--
chrX	71398130	71398273	chrX_9588_IP1	3	+	144	3	71398133	intron:1.0;	ENSMUSG00000015214.12	Mtmr1	chrX	protein_coding	myotubularin related protein 1
chr13	42626838	42627047	chr13_16888_IP1	3	-	210	3	42626901	intergenic;	--
chr13	115510833	115510993	chr13_18563_IP1	3	-	161	3	115510850	intergenic;	--
chr13	84749585	84749789	chr13_15523_IP1	3	+	205	3	84749643	intergenic;	--
chr13	46798341	46798420	chr13_16972_IP1	4	-	80	4	46798341	CDS:1.0;	ENSMUSG00000021375.9	Kif13a	chr13	protein_coding	kinesin family member 13A
chr13	8203286	8203493	chr13_16394_IP1	3	-	208	3	8203348	antisense;	ENSMUSG00000052551.13	Adarb2	chr13	protein_coding	adenosine deaminase, RNA-specific, B2
chr13	73944706	73944921	chr13_15262_IP1	7	+	216	7	73944774	CDS:0.62;intron:0.38;	ENSMUSG00000057649.5	Brd9	chr13	protein_coding	bromodomain containing 9
chr13	32024349	32024559	chr13_16717_IP1	3	-	211	3	32024413	intron:1.0;	ENSMUSG00000038372.11	Gmds	chr13	protein_coding	GDP-mannose 4, 6-dehydratase
chr13	84887064	84887238	chr13_17821_IP1	3	-	175	3	84887091	intergenic;	--
chr13	42051932	42052083	chr13_14603_IP1	3	+	152	3	42051939	five_prime_UTR:0.42;intron:0.58;	ENSMUSG00000021366.7	Hivep1	chr13	protein_coding	human immunodeficiency virus type I enhancer binding protein 1
chr13	20537647	20537804	chr13_16533_IP1	3	-	158	3	20537657	antisense;	ENSMUSG00000041112.13	Elmo1	chr13	protein_coding	engulfment and cell motility 1
chr13	84152688	84152831	chr13_15512_IP1	3	+	144	3	84152691	intergenic;	--
chr13	32424699	32424894	chr13_16728_IP1	3	-	196	3	32424747	intergenic;	--
chr13	87837693	87838045	chr13_17896_IP1	4	-	353	3	87837898	intergenic;	--
chr13	49582569	49582761	chr13_14759_IP1	3	+	193	3	49582614	antisense;	ENSMUSG00000021391.9	Cenpp	chr13	protein_coding	centromere protein P
chr13	105091788	105091933	chr13_15987_IP1	3	+	146	3	105091791	intron:1.0;	ENSMUSG00000021718.5	4933425L06Rik	chr13	protein_coding	RIKEN cDNA 4933425L06 gene
chr13	8852870	8853027	chr13_16402_IP1	3	-	158	3	8852881	intron:1.0;	ENSMUSG00000021147.14	Wdr37	chr13	protein_coding	WD repeat domain 37
chr13	76113569	76113807	chr13_15302_IP1	4	+	239	4	76113660	CDS:0.59;intron:0.41;	ENSMUSG00000033991.8	Ttc37	chr13	protein_coding	tetratricopeptide repeat domain 37
chr13	9095262	9095536	chr13_14074_IP1	4	+	275	4	9095403	intron:1.0;	ENSMUSG00000033499.11	Larp4b	chr13	protein_coding	La ribonucleoprotein domain family, member 4B
chr13	55476236	55476316	chr13_17237_IP1	3	-	81	3	55476244	CDS:1.0;	ENSMUSG00000034675.15	Dbn1	chr13	protein_coding	drebrin 1
chr13	48805230	48805297	chr13_17023_IP1	4	-	68	4	48805230	CDS:1.0;	ENSMUSG00000038025.7	Phf2	chr13	protein_coding	PHD finger protein 2
chr13	45389761	45390043	chr13_14660_IP1	9	+	283	8	45389849	five_prime_UTR:0.69;CDS:0.31;	ENSMUSG00000038175.9	Mylip	chr13	protein_coding	myosin regulatory light chain interacting protein
chr13	82829240	82829401	chr13_17774_IP1	3	-	162	3	82829254	intergenic;	--
chr13	49384970	49385071	chr13_14751_IP1	10	+	102	10	49384975	three_prime_UTR:1.0;	ENSMUSG00000037933.13	Bicd2	chr13	protein_coding	bicaudal D homolog 2 (Drosophila)
chr13	119463042	119463144	chr13_16296_IP1	4	+	103	4	119463078	five_prime_UTR:0.75;intron:0.25;	ENSMUSG00000062822.7	4833420G17Rik	chr13	protein_coding	RIKEN cDNA 4833420G17 gene
chr13	100719301	100719370	chr13_18237_IP1	4	-	70	4	100719354	CDS:1.0;	ENSMUSG00000069089.7	Cdk7	chr13	protein_coding	cyclin-dependent kinase 7
chr13	103921132	103921432	chr13_15950_IP1	5	+	301	4	103921285	intergenic;	--
chr13	34369482	34369628	chr13_16765_IP1	3	-	147	3	34369485	intergenic;	--
chr13	24026787	24026964	chr13_16583_IP1	4	-	178	4	24026817	intron:1.0;	ENSMUSG00000021338.15	Lrrc16a	chr13	protein_coding	leucine rich repeat containing 16A
chr13	54107609	54107731	chr13_14831_IP1	4	+	123	4	54107656	three_prime_UTR:1.0;	ENSMUSG00000021474.8	Sfxn1	chr13	protein_coding	sideroflexin 1
chr13	31496235	31496402	chr13_14414_IP1	3	+	168	3	31496255	intergenic;	--
chr13	81033969	81034134	chr13_17738_IP1	3	-	166	3	81033987	antisense;	ENSMUSG00000097098.5	9330111N05Rik	chr13	lincRNA	RIKEN cDNA 9330111N05 gene
chr13	119118870	119119043	chr13_16285_IP1	3	+	174	3	119118897	intergenic;	--
chr13	83867068	83867315	chr13_15504_IP1	4	+	248	4	83867173	intergenic;	--
chr13	88105196	88105444	chr13_17905_IP1	4	-	249	4	88105299	intergenic;	--
chr13	41819439	41819604	chr13_16880_IP1	3	-	166	3	41819458	intron:1.0;	ENSMUSG00000058022.11	Adtrp	chr13	protein_coding	androgen dependent TFPI regulating protein
chr13	32002238	32002535	chr13_16716_IP1	4	-	298	3	32002336	intron:1.0;	ENSMUSG00000038372.11	Gmds	chr13	protein_coding	GDP-mannose 4, 6-dehydratase
chr13	55500869	55501007	chr13_17243_IP1	12	-	139	12	55500922	intron:1.0;	ENSMUSG00000021493.13	Pdlim7	chr13	protein_coding	PDZ and LIM domain 7
chr13	42077537	42077607	chr13_14606_IP1	4	+	71	4	42077540	intron:1.0;	ENSMUSG00000021366.7	Hivep1	chr13	protein_coding	human immunodeficiency virus type I enhancer binding protein 1
chr13	10111048	10111215	chr13_16424_IP1	3	-	168	3	10111069	intron:1.0;	ENSMUSG00000046159.13	Chrm3	chr13	protein_coding	cholinergic receptor, muscarinic 3, cardiac
chr13	24475332	24475569	chr13_16594_IP1	6	-	238	6	24475446	antisense;	ENSMUSG00000016756.14	Cmah	chr13	protein_coding	cytidine monophospho-N-acetylneuraminic acid hydroxylase
chr13	24803358	24803509	chr13_14343_IP1	5	+	152	5	24803445	five_prime_UTR:0.15;CDS:0.85;	ENSMUSG00000019132.8	BC005537	chr13	protein_coding	cDNA sequence BC005537
chr13	91460568	91460805	chr13_15697_IP1	4	+	238	4	91460658	intergenic;	--
chr13	23739105	23739296	chr13_16580_IP1	3	-	192	3	23739154	antisense;	ENSMUSG00000036181.2	Hist1h1c	chr13	protein_coding	histone cluster 1, H1c
chr13	107793811	107793960	chr13_16026_IP1	3	+	150	3	107793813	antisense;	ENSMUSG00000032846.9	Zswim6	chr13	protein_coding	zinc finger SWIM-type containing 6
chr13	46670101	46670255	chr13_16962_IP1	7	-	155	7	46670111	antisense;	ENSMUSG00000069237.8	C78339	chr13	protein_coding		--
chr13	78163337	78163471	chr13_17674_IP1	5	-	135	5	78163374	antisense;	ENSMUSG00000064138.11	Fam172a	chr13	protein_coding	family with sequence similarity 172, member A
chr13	107749917	107750032	chr13_18401_IP1	4	-	116	4	107749929	intron:1.0;	ENSMUSG00000032846.9	Zswim6	chr13	protein_coding	zinc finger SWIM-type containing 6
chr13	85749541	85749735	chr13_15546_IP1	3	+	195	3	85749589	intergenic;	--
chr13	28952800	28952998	chr13_16649_IP1	12	-	199	12	28952928	CDS:1.0;	ENSMUSG00000076431.4	Sox4	chr13	protein_coding	SRY (sex determining region Y)-box 4
chr13	81623438	81623595	chr13_17748_IP1	3	-	158	3	81623449	intron:1.0;	ENSMUSG00000069170.11	Adgrv1	chr13	protein_coding	adhesion G protein-coupled receptor V1
chr13	14587218	14587341	chr13_16459_IP1	3	-	124	3	14587221	intergenic;	--
chr13	77736803	77736985	chr13_15327_IP1	3	+	183	3	77736838	intron:1.0;	ENSMUSG00000064138.11	Fam172a	chr13	protein_coding	family with sequence similarity 172, member A
chr13	51645474	51645604	chr13_14799_IP1	8	+	131	8	51645496	intron:1.0;	ENSMUSG00000062248.5	Cks2	chr13	protein_coding	CDC28 protein kinase regulatory subunit 2
chr13	58268119	58268299	chr13_17329_IP1	3	-	181	3	58268152	intron:1.0;	ENSMUSG00000021552.6	Gkap1	chr13	protein_coding	G kinase anchoring protein 1
chr13	33931606	33931646	chr13_16746_IP1	3	-	41	3	33931620	CDS:1.0;	ENSMUSG00000060147.13	Serpinb6a	chr13	protein_coding	serine (or cysteine) peptidase inhibitor, clade B, member 6a
chr13	22060771	22061029	chr13_14292_IP1	3	+	259	3	22060884	intergenic;	--
chr13	51100865	51101062	chr13_14791_IP1	9	+	198	9	51100951	five_prime_UTR:0.56;intron:0.44;	ENSMUSG00000021395.10	Spin1	chr13	protein_coding	spindlin 1
chr13	51645298	51645440	chr13_14798_IP1	4	+	143	4	51645383	five_prime_UTR:0.8;CDS:0.2;	ENSMUSG00000062248.5	Cks2	chr13	protein_coding	CDC28 protein kinase regulatory subunit 2
chr13	63314049	63314270	chr13_17415_IP1	4	-	222	4	63314123	intron:1.0;	ENSMUSG00000021461.14	Fancc	chr13	protein_coding	Fanconi anemia, complementation group C
chr13	78163512	78163712	chr13_15348_IP1	4	+	201	4	78163620	three_prime_UTR:0.28;CDS:0.71;	ENSMUSG00000064138.11	Fam172a	chr13	protein_coding	family with sequence similarity 172, member A
chr13	29984462	29984718	chr13_16674_IP1	7	-	257	7	29984571	intron:1.0;	ENSMUSG00000016477.15	E2f3	chr13	protein_coding	E2F transcription factor 3
chr13	25908739	25908977	chr13_16611_IP1	3	-	239	3	25908830	intergenic;	--
chr13	28951907	28952195	chr13_14393_IP1	4	+	289	4	28952048	antisense;	ENSMUSG00000076431.4	Sox4	chr13	protein_coding	SRY (sex determining region Y)-box 4
chr13	7292450	7292657	chr13_16382_IP1	3	-	208	3	7292510	intergenic;	--
chr13	87746906	87747150	chr13_15602_IP1	4	+	245	4	87747009	intergenic;	--
chr13	118644054	118644254	chr13_18642_IP1	3	-	201	3	118644108	intergenic;	--
chr13	63946234	63946406	chr13_17429_IP1	3	-	173	3	63946259	intergenic;	--
chr13	98902639	98902798	chr13_18182_IP1	4	-	160	4	98902650	intron:1.0;	ENSMUSG00000009470.14	Tnpo1	chr13	protein_coding	transportin 1
chr13	78199040	78199142	chr13_15350_IP1	8	+	103	8	78199062	antisense;	ENSMUSG00000069171.11	Nr2f1	chr13	protein_coding	nuclear receptor subfamily 2, group F, member 1
chr13	31625752	31625901	chr13_14418_IP1	4	+	150	4	31625801	five_prime_UTR:0.58;intron:0.42;	ENSMUSG00000038402.2	Foxf2	chr13	protein_coding	forkhead box F2
chr13	55454316	55454398	chr13_14907_IP1	6	+	83	6	55454334	CDS:1.0;	ENSMUSG00000074886.8	Grk6	chr13	protein_coding	G protein-coupled receptor kinase 6
chr13	98355735	98355937	chr13_15856_IP1	12	+	203	12	98355801	CDS:1.0;	ENSMUSG00000078302.4	Foxd1	chr13	protein_coding	forkhead box D1
chr13	80485982	80486176	chr13_15413_IP1	3	+	195	3	80486029	intergenic;	--
chr13	93392396	93392652	chr13_18043_IP1	4	-	257	4	93392505	antisense;	ENSMUSG00000007617.15	Homer1	chr13	protein_coding	homer homolog 1 (Drosophila)
chr13	78935281	78935469	chr13_15372_IP1	3	+	189	3	78935322	intergenic;	--
chr13	49266590	49266731	chr13_17075_IP1	4	-	142	4	49266638	CDS:1.0;	ENSMUSG00000037946.9	Fgd3	chr13	protein_coding	FYVE, RhoGEF and PH domain containing 3
chr13	35786910	35787084	chr13_14486_IP1	3	+	175	3	35786937	intron:1.0;	ENSMUSG00000059288.11	Cdyl	chr13	protein_coding	chromodomain protein, Y chromosome-like
chr13	60177030	60177262	chr13_17383_IP1	21	-	233	19	60177165	five_prime_UTR:1.0;	ENSMUSG00000052957.7	Gas1	chr13	protein_coding	growth arrest specific 1
chr13	37993791	37994007	chr13_16823_IP1	6	-	217	5	37993811	CDS:0.01;intron:0.99;	ENSMUSG00000021427.9	Ssr1	chr13	protein_coding	signal sequence receptor, alpha
chr13	48949291	48949303	chr13_17059_IP1	8	-	13	8	48949301	CDS:1.0;	ENSMUSG00000038014.7	Fam120a	chr13	protein_coding	family with sequence similarity 120, member A
chr13	101281627	101281806	chr13_15909_IP1	3	+	180	3	101281659	intergenic;	--
chr13	86829806	86830046	chr13_17875_IP1	3	-	241	3	86829901	intergenic;	--
chr13	21748515	21748866	chr13_14286_IP1	5	+	352	4	21748572	intergenic;	--
chr13	9170755	9171096	chr13_14085_IP1	12	+	342	8	9170852	three_prime_UTR:0.45;CDS:0.55;	ENSMUSG00000033499.11	Larp4b	chr13	protein_coding	La ribonucleoprotein domain family, member 4B
chr13	41187763	41187814	chr13_16874_IP1	3	-	52	3	41187766	intron:1.0;	ENSMUSG00000021364.13	Elovl2	chr13	protein_coding	elongation of very long chain fatty acids (FEN1/Elo2, SUR4/Elo3, yeast)-like 2
chr13	85289281	85289487	chr13_15539_IP1	3	+	207	3	85289340	intergenic;	--
chr13	109383063	109383212	chr13_18436_IP1	3	-	150	3	109383066	antisense;	ENSMUSG00000021699.15	Pde4d	chr13	protein_coding	phosphodiesterase 4D, cAMP specific
chr13	54794922	54795091	chr13_14881_IP1	6	+	170	6	54794967	CDS:0.23;intron:0.77;	ENSMUSG00000025875.12	Tspan17	chr13	protein_coding	tetraspanin 17
chr13	108593643	108593768	chr13_16045_IP1	3	+	126	3	108593646	intergenic;	--
chr13	13592987	13593199	chr13_16452_IP1	3	-	213	3	13593055	antisense;	ENSMUSG00000019726.10	Lyst	chr13	protein_coding	lysosomal trafficking regulator
chr13	85537601	85537800	chr13_17845_IP1	4	-	200	4	85537653	intergenic;	--
chr13	54575199	54575277	chr13_14847_IP1	4	+	79	4	54575275	CDS:1.0;	ENSMUSG00000025870.8	Arl10	chr13	protein_coding	ADP-ribosylation factor-like 10
chr13	31807719	31807888	chr13_14425_IP1	11	+	170	11	31807807	CDS:1.0;	ENSMUSG00000050295.3	Foxc1	chr13	protein_coding	forkhead box C1
chr13	100015385	100015517	chr13_18215_IP1	4	-	133	4	100015397	five_prime_UTR:0.02;CDS:0.98;	ENSMUSG00000021646.8	Mccc2	chr13	protein_coding	methylcrotonoyl-Coenzyme A carboxylase 2 (beta)
chr13	94800092	94800258	chr13_15797_IP1	3	+	167	3	94800112	intron:1.0;	ENSMUSG00000042043.5	Tbca	chr13	protein_coding	tubulin cofactor A
chr13	50881846	50882053	chr13_17102_IP1	3	-	208	3	50881908	intergenic;	--
chr13	81036346	81036668	chr13_15430_IP1	4	+	323	3	81036449	intron:1.0;	ENSMUSG00000097098.5	9330111N05Rik	chr13	lincRNA	RIKEN cDNA 9330111N05 gene
chr13	4184577	4184846	chr13_14008_IP1	3	+	270	3	4184699	intergenic;	--
chr13	3052426	3052650	chr13_13993_IP1	3	+	225	3	3052503	intergenic;	--
chr13	33935572	33935737	chr13_16747_IP1	8	-	166	8	33935602	five_prime_UTR:0.35;CDS:0.32;intron:0.33;	ENSMUSG00000060147.13	Serpinb6a	chr13	protein_coding	serine (or cysteine) peptidase inhibitor, clade B, member 6a
chr13	64152742	64152856	chr13_15125_IP1	3	+	115	3	64152745	antisense;	ENSMUSG00000044934.10	Zfp367	chr13	protein_coding	zinc finger protein 367
chr13	118439405	118439605	chr13_16274_IP1	3	+	201	3	118439458	intergenic;	--
chr13	81783413	81783667	chr13_15449_IP1	4	+	255	3	81783583	intron:1.0;	ENSMUSG00000021537.8	Cetn3	chr13	protein_coding	centrin 3
chr13	30973789	30973948	chr13_16699_IP1	4	-	160	4	30973850	intron:1.0;	ENSMUSG00000021357.11	Exoc2	chr13	protein_coding	exocyst complex component 2
chr13	88751250	88751529	chr13_17924_IP1	3	-	280	3	88751382	intergenic;	--
chr13	73328364	73328458	chr13_17559_IP1	5	-	95	5	73328421	five_prime_UTR:0.13;CDS:0.87;	ENSMUSG00000021606.7	Ndufs6	chr13	protein_coding	NADH dehydrogenase (ubiquinone) Fe-S protein 6
chr13	82765261	82765401	chr13_15475_IP1	3	+	141	3	82765264	intergenic;	--
chr13	73797574	73797701	chr13_15247_IP1	6	+	128	6	73797638	CDS:1.0;	ENSMUSG00000017756.8	Slc12a7	chr13	protein_coding	solute carrier family 12, member 7
chr13	45789969	45790101	chr13_16945_IP1	4	-	133	4	45789978	intron:1.0;	ENSMUSG00000046876.13	Atxn1	chr13	protein_coding	ataxin 1
chr13	77096562	77096784	chr13_17650_IP1	3	-	223	3	77096648	intron:1.0;	ENSMUSG00000021597.14	Ankrd32	chr13	protein_coding	ankyrin repeat domain 32
chr13	3561996	3562037	chr13_14000_IP1	4	+	42	4	3562035	CDS:1.0;	ENSMUSG00000021218.9	Gdi2	chr13	protein_coding	guanosine diphosphate (GDP) dissociation inhibitor 2
chr13	76427083	76427230	chr13_15308_IP1	3	+	148	3	76427086	intron:1.0;	ENSMUSG00000021596.14	Mctp1	chr13	protein_coding	multiple C2 domains, transmembrane 1
chr13	46793926	46794052	chr13_16971_IP1	4	-	127	4	46794009	CDS:1.0;	ENSMUSG00000021375.9	Kif13a	chr13	protein_coding	kinesin family member 13A
chr13	73509394	73509521	chr13_15231_IP1	4	+	128	4	73509432	intron:1.0;	ENSMUSG00000021608.12	Lpcat1	chr13	protein_coding	lysophosphatidylcholine acyltransferase 1
chr13	90452687	90452975	chr13_17979_IP1	3	-	289	3	90452830	intergenic;	--
chr13	28953010	28953315	chr13_16650_IP1	18	-	306	13	28953094	five_prime_UTR:0.96;CDS:0.04;	ENSMUSG00000076431.4	Sox4	chr13	protein_coding	SRY (sex determining region Y)-box 4
chr13	118386983	118387228	chr13_18636_IP1	9	-	246	8	118387026	CDS:1.0;	ENSMUSG00000021731.9	Mrps30	chr13	protein_coding	mitochondrial ribosomal protein S30
chr13	104130848	104131095	chr13_15955_IP1	3	+	248	3	104130948	intron:1.0;	ENSMUSG00000042743.11	Sgtb	chr13	protein_coding	small glutamine-rich tetratricopeptide repeat (TPR)-containing, beta
chr13	63284857	63284976	chr13_15097_IP1	3	+	120	3	63284860	intron:1.0;	ENSMUSG00000021458.14	2010111I01Rik	chr13	protein_coding	RIKEN cDNA 2010111I01 gene
chr13	48889214	48889364	chr13_17042_IP1	6	-	151	6	48889243	CDS:0.31;intron:0.69;	ENSMUSG00000038014.7	Fam120a	chr13	protein_coding	family with sequence similarity 120, member A
chr13	87520642	87520791	chr13_15595_IP1	3	+	150	3	87520644	intergenic;	--
chr13	49252714	49252873	chr13_14740_IP1	3	+	160	3	49252726	intergenic;	--
chr13	32338393	32338573	chr13_16726_IP1	4	-	181	4	32338495	five_prime_UTR:0.5;CDS:0.5;	ENSMUSG00000038372.11	Gmds	chr13	protein_coding	GDP-mannose 4, 6-dehydratase
chr13	14749071	14749242	chr13_16462_IP1	3	-	172	3	14749095	intergenic;	--
chr13	6089456	6089625	chr13_16362_IP1	4	-	170	4	6089479	intergenic;	--
chr13	116202422	116202647	chr13_18589_IP1	3	-	226	3	116202501	intergenic;	--
chr13	115533179	115533334	chr13_16201_IP1	3	+	156	3	115533191	intergenic;	--
chr13	93978105	93978503	chr13_15766_IP1	5	+	399	4	93978360	intergenic;	--
chr13	98316436	98316811	chr13_18152_IP1	24	-	376	17	98316635	five_prime_UTR:0.16;CDS:0.34;intron:0.5;	ENSMUSG00000021660.12	Btf3	chr13	protein_coding	basic transcription factor 3
chr13	36726585	36726719	chr13_16799_IP1	4	-	135	4	36726646	three_prime_UTR:0.31;CDS:0.69;	ENSMUSG00000039114.13	Nrn1	chr13	protein_coding	neuritin 1
chr13	110390224	110390471	chr13_16081_IP1	4	+	248	4	110390325	intergenic;	--
chr13	82599869	82600058	chr13_15468_IP1	4	+	190	4	82599912	intergenic;	--
chr13	78201739	78201829	chr13_15352_IP1	6	+	91	6	78201756	intergenic;	--
chr13	117832504	117832673	chr13_18627_IP1	3	-	170	3	117832527	antisense;	ENSMUSG00000021730.7	Hcn1	chr13	protein_coding	hyperpolarization-activated, cyclic nucleotide-gated K+ 1
chr13	94057615	94058119	chr13_15768_IP1	24	+	505	14	94057728	five_prime_UTR:0.22;intron:0.78;	ENSMUSG00000045312.9	Lhfpl2	chr13	protein_coding	lipoma HMGIC fusion partner-like 2
chr13	90565280	90565441	chr13_15688_IP1	3	+	162	3	90565297	intergenic;	--
chr13	55321639	55321867	chr13_17219_IP1	8	-	229	8	55321749	five_prime_UTR:0.93;CDS:0.07;	ENSMUSG00000034789.7	Rab24	chr13	protein_coding	RAB24, member RAS oncogene family
chr13	54593657	54593823	chr13_17170_IP1	4	-	167	4	54593727	three_prime_UTR:1.0;	ENSMUSG00000047547.12	Cltb	chr13	protein_coding	clathrin, light polypeptide (Lcb)
chr13	16879063	16879211	chr13_14226_IP1	3	+	149	3	16879113	antisense;	ENSMUSG00000055137.6	Sugct	chr13	protein_coding	succinyl-CoA glutarate-CoA transferase
chr13	101767976	101768151	chr13_18266_IP1	3	-	176	3	101768004	five_prime_UTR:1.0;	ENSMUSG00000041417.13	Pik3r1	chr13	protein_coding	phosphatidylinositol 3-kinase, regulatory subunit, polypeptide 1 (p85 alpha)
chr13	44987650	44987884	chr13_16933_IP1	8	-	235	6	44987780	intron:1.0;	ENSMUSG00000057531.11	Dtnbp1	chr13	protein_coding	dystrobrevin binding protein 1
chr13	104323600	104323775	chr13_15969_IP1	3	+	176	3	104323628	intron:1.0;	ENSMUSG00000046169.9	Adamts6	chr13	protein_coding	a disintegrin-like and metallopeptidase (reprolysin type) with thrombospondin type 1 motif, 6
chr13	49341643	49341783	chr13_14743_IP1	4	+	141	4	49341714	five_prime_UTR:0.19;CDS:0.81;	ENSMUSG00000037933.13	Bicd2	chr13	protein_coding	bicaudal D homolog 2 (Drosophila)
chr13	56703160	56703564	chr13_14976_IP1	12	+	405	8	56703317	intron:1.0;	ENSMUSG00000021540.14	Smad5	chr13	protein_coding	SMAD family member 5
chr13	106846085	106846209	chr13_16007_IP1	3	+	125	3	106846088	antisense;	ENSMUSG00000042590.14	Ipo11	chr13	protein_coding	importin 11
chr13	100774095	100774203	chr13_18243_IP1	4	-	109	4	100774098	intron:1.0;	ENSMUSG00000045273.8	Cenph	chr13	protein_coding	centromere protein H
chr13	93498642	93499155	chr13_18046_IP1	16	-	514	6	93498788	CDS:1.0;	ENSMUSG00000021690.9	Jmy	chr13	protein_coding	junction-mediating and regulatory protein
chr13	87619118	87619379	chr13_15599_IP1	3	+	262	3	87619233	intergenic;	--
chr13	35553716	35554004	chr13_14480_IP1	4	+	289	3	35553801	intergenic;	--
chr13	110950820	110951089	chr13_16099_IP1	3	+	270	3	110950943	intergenic;	--
chr13	88157965	88158082	chr13_17908_IP1	3	-	118	3	88158046	intergenic;	--
chr13	34344260	34344410	chr13_16762_IP1	4	-	151	4	34344275	CDS:1.0;	ENSMUSG00000038267.12	Slc22a23	chr13	protein_coding	solute carrier family 22, member 23
chr13	66932935	66933032	chr13_17469_IP1	3	-	98	3	66932947	five_prime_UTR:1.0;	ENSMUSG00000021519.8	Mterf3	chr13	protein_coding	mitochondrial transcription termination factor 3
chr13	111555467	111555615	chr13_16109_IP1	3	+	149	3	111555468	intergenic;	--
chr13	107022042	107022342	chr13_18388_IP1	24	-	301	19	107022248	five_prime_UTR:0.14;CDS:0.11;intron:0.75;	ENSMUSG00000021693.17	Kif2a	chr13	protein_coding	kinesin family member 2A
chr13	17261210	17261447	chr13_14227_IP1	3	+	238	3	17261298	antisense;	ENSMUSG00000055137.6	Sugct	chr13	protein_coding	succinyl-CoA glutarate-CoA transferase
chr13	23124949	23125119	chr13_16564_IP1	4	-	171	4	23125006	antisense;	ENSMUSG00000084315.1	Vmn1r-ps128	chr13	unprocessed_pseudogene	vomeronasal 1 receptor, pseudogene 128
chr13	50216666	50216888	chr13_17095_IP1	3	-	223	3	50216741	intergenic;	--
chr13	84919276	84919427	chr13_17823_IP1	3	-	152	3	84919280	intergenic;	--
chr13	86929249	86929502	chr13_17882_IP1	3	-	254	3	86929355	intergenic;	--
chr13	7940479	7940651	chr13_14059_IP1	3	+	173	3	7940505	intergenic;	--
chr13	46445547	46445739	chr13_14681_IP1	3	+	193	3	46445592	intergenic;	--
chr13	58045901	58046052	chr13_14989_IP1	3	+	152	3	58045905	antisense;	ENSMUSG00000014164.12	Klhl3	chr13	protein_coding	kelch-like 3
chr13	5435570	5435834	chr13_14027_IP1	3	+	265	3	5435688	intergenic;	--
chr13	24804781	24804864	chr13_14344_IP1	4	+	84	4	24804781	CDS:1.0;	ENSMUSG00000019132.8	BC005537	chr13	protein_coding	cDNA sequence BC005537
chr13	96670937	96671100	chr13_15826_IP1	4	+	164	4	96670953	intergenic;	--
chr13	13393422	13393586	chr13_16450_IP1	6	-	165	6	13393468	five_prime_UTR:0.57;CDS:0.43;	ENSMUSG00000021306.10	Gpr137b	chr13	protein_coding	G protein-coupled receptor 137B
chr13	31855697	31855847	chr13_14432_IP1	3	+	151	3	31855702	antisense;	ENSMUSG00000038372.11	Gmds	chr13	protein_coding	GDP-mannose 4, 6-dehydratase
chr13	107889405	107889572	chr13_18416_IP1	4	-	168	4	107889425	CDS:1.0;	ENSMUSG00000032846.9	Zswim6	chr13	protein_coding	zinc finger SWIM-type containing 6
chr13	55464100	55464300	chr13_14913_IP1	3	+	201	3	55464158	five_prime_UTR:0.17;intron:0.83;	ENSMUSG00000034686.7	Prr7	chr13	protein_coding	proline rich 7 (synaptic)
chr13	87094108	87094420	chr13_17887_IP1	6	-	313	5	87094273	intergenic;	--
chr13	61270023	61270228	chr13_15066_IP1	3	+	206	3	61270081	intergenic;	--
chr13	59675617	59675793	chr13_17365_IP1	4	-	177	4	59675676	five_prime_UTR:0.33;intron:0.67;	ENSMUSG00000021556.9	Golm1	chr13	protein_coding	golgi membrane protein 1
chr13	93852600	93852772	chr13_15761_IP1	3	+	173	3	93852626	intron:1.0;	ENSMUSG00000042082.6	Arsb	chr13	protein_coding	arylsulfatase B
chr13	9671946	9672050	chr13_14102_IP1	3	+	105	3	9671949	intergenic;	--
chr13	114073334	114073536	chr13_16175_IP1	3	+	203	3	114073390	intron:1.0;	ENSMUSG00000042348.9	Arl15	chr13	protein_coding	ADP-ribosylation factor-like 15
chr13	49720497	49720590	chr13_14766_IP1	4	+	94	4	49720533	intron:1.0;	ENSMUSG00000037851.11	Iars	chr13	protein_coding	isoleucine-tRNA synthetase
chr13	103920578	103920860	chr13_15948_IP1	4	+	283	3	103920682	intergenic;	--
chr13	116854782	116854928	chr13_16234_IP1	3	+	147	3	116854785	antisense;	ENSMUSG00000021725.8	Parp8	chr13	protein_coding	poly (ADP-ribose) polymerase family, member 8
chr13	106845714	106845836	chr13_16006_IP1	3	+	123	3	106845717	antisense;	ENSMUSG00000042590.14	Ipo11	chr13	protein_coding	importin 11
chr13	92300524	92300689	chr13_18015_IP1	3	-	166	3	92300543	intron:1.0;	ENSMUSG00000014850.13	Msh3	chr13	protein_coding	mutS homolog 3 (E. coli)
chr13	90972327	90972443	chr13_17992_IP1	3	-	117	3	90972330	intron:1.0;	ENSMUSG00000021619.5	Atg10	chr13	protein_coding	autophagy related 10
chr13	55570570	55570713	chr13_17268_IP1	7	-	144	7	55570574	five_prime_UTR:1.0;	ENSMUSG00000021495.8	Fam193b	chr13	protein_coding	family with sequence similarity 193, member B
chr13	91576912	91577152	chr13_15706_IP1	3	+	241	3	91577005	intron:1.0;	ENSMUSG00000003992.12	Ssbp2	chr13	protein_coding	single-stranded DNA binding protein 2
chr13	15463751	15464013	chr13_14208_IP1	4	+	263	4	15463893	five_prime_UTR:0.13;intron:0.87;	ENSMUSG00000021318.13	Gli3	chr13	protein_coding	GLI-Kruppel family member GLI3
chr13	88357829	88358076	chr13_15618_IP1	3	+	248	3	88357929	intergenic;	--
chr13	109206957	109207079	chr13_16062_IP1	3	+	123	3	109206960	intron:1.0;	ENSMUSG00000021699.15	Pde4d	chr13	protein_coding	phosphodiesterase 4D, cAMP specific
chr13	33380805	33380934	chr13_14448_IP1	3	+	130	3	33380808	intergenic;	--
chr13	64954751	64954889	chr13_15133_IP1	3	+	139	3	64954754	intergenic;	--
chr13	88822458	88822484	chr13_15635_IP1	3	+	27	3	88822458	intron:1.0;	ENSMUSG00000034488.12	Edil3	chr13	protein_coding	EGF-like repeats and discoidin I-like domains 3
chr13	93326086	93326286	chr13_18039_IP1	3	-	201	3	93326139	antisense;	ENSMUSG00000007617.15	Homer1	chr13	protein_coding	homer homolog 1 (Drosophila)
chr13	17715664	17715949	chr13_16492_IP1	5	-	286	5	17715802	intergenic;	--
chr13	35741656	35741867	chr13_16784_IP1	4	-	212	4	35741720	antisense;	ENSMUSG00000059288.11	Cdyl	chr13	protein_coding	chromodomain protein, Y chromosome-like
chr13	54681054	54681205	chr13_17182_IP1	7	-	152	7	54681132	three_prime_UTR:1.0;	ENSMUSG00000034928.14	Rnf44	chr13	protein_coding	ring finger protein 44
chr13	67543955	67544157	chr13_17482_IP1	3	-	203	3	67544011	intron:1.0;	ENSMUSG00000095432.6	Zfp748	chr13	protein_coding	zinc finger protein 748
chr13	20307405	20307584	chr13_16530_IP1	3	-	180	3	20307438	antisense;	ENSMUSG00000041112.13	Elmo1	chr13	protein_coding	engulfment and cell motility 1
chr13	105666544	105666703	chr13_18352_IP1	3	-	160	3	105666557	intergenic;	--
chr13	12857749	12857962	chr13_16445_IP1	3	-	214	3	12857818	intergenic;	--
chr13	22043477	22043625	chr13_14291_IP1	7	+	149	7	22043516	three_prime_UTR:0.1;CDS:0.9;	ENSMUSG00000069300.3	Hist1h2bj	chr13	protein_coding	histone cluster 1, H2bj
chr13	58128307	58128526	chr13_14997_IP1	13	+	220	9	58128335	antisense;	ENSMUSG00000007836.6	Hnrnpa0	chr13	protein_coding	heterogeneous nuclear ribonucleoprotein A0
chr13	55550223	55550449	chr13_17261_IP1	12	-	227	8	55550384	CDS:0.81;intron:0.19;	ENSMUSG00000021495.8	Fam193b	chr13	protein_coding	family with sequence similarity 193, member B
chr13	111686361	111686589	chr13_18486_IP1	8	-	229	6	111686403	antisense;	ENSMUSG00000032727.11	Mier3	chr13	protein_coding	mesoderm induction early response 1, family member 3
chr13	72624024	72624185	chr13_17550_IP1	4	-	162	4	72624042	intergenic;	--
chr13	78199157	78199506	chr13_17682_IP1	14	-	350	10	78199361	five_prime_UTR:1.0;	ENSMUSG00000069171.11	Nr2f1	chr13	protein_coding	nuclear receptor subfamily 2, group F, member 1
chr13	8870691	8870908	chr13_16404_IP1	4	-	218	4	8870784	five_prime_UTR:0.18;intron:0.82;	ENSMUSG00000021147.14	Wdr37	chr13	protein_coding	WD repeat domain 37
chr13	47105637	47105824	chr13_14701_IP1	12	+	188	8	47105688	antisense;	ENSMUSG00000021377.12	Dek	chr13	protein_coding	DEK oncogene (DNA binding)
chr13	70604035	70604176	chr13_17519_IP1	4	-	142	4	70604063	CDS:1.0;	ENSMUSG00000034525.6	Ice1	chr13	protein_coding	interactor of little elongation complex ELL subunit 1
chr13	54680253	54680387	chr13_14867_IP1	4	+	135	4	54680263	antisense;	ENSMUSG00000034928.14	Rnf44	chr13	protein_coding	ring finger protein 44
chr13	86155273	86155388	chr13_15558_IP1	4	+	116	4	86155300	intergenic;	--
chr13	103920912	103921091	chr13_15949_IP1	4	+	180	4	103920944	intergenic;	--
chr13	46929789	46929932	chr13_16980_IP1	3	-	144	3	46929802	intergenic;	--
chr13	50457296	50457421	chr13_14783_IP1	3	+	126	3	50457299	antisense;	ENSMUSG00000101136.1	Gm8739	chr13	antisense	predicted gene 8739
chr13	14063818	14064032	chr13_14177_IP1	6	+	215	6	14063932	five_prime_UTR:1.0;	ENSMUSG00000039219.15	Arid4b	chr13	protein_coding	AT rich interactive domain 4B (RBP1-like)
chr13	50456905	50457076	chr13_17100_IP1	3	-	172	3	50456930	intron:1.0;	ENSMUSG00000101136.1	Gm8739	chr13	antisense	predicted gene 8739
chr13	55322045	55322235	chr13_14895_IP1	10	+	191	9	55322128	five_prime_UTR:0.71;CDS:0.24;intron:0.05;	ENSMUSG00000021486.6	Prelid1	chr13	protein_coding	PRELI domain containing 1
chr13	119760379	119760462	chr13_16309_IP1	3	+	84	3	119760382	intergenic;	--
chr13	40491455	40491570	chr13_14576_IP1	4	+	116	4	40491458	intergenic;	--
chr13	14064285	14064453	chr13_14178_IP1	4	+	169	4	14064306	intron:1.0;	ENSMUSG00000039219.15	Arid4b	chr13	protein_coding	AT rich interactive domain 4B (RBP1-like)
chr13	22469780	22470014	chr13_16560_IP1	4	-	235	4	22469869	intergenic;	--
chr13	49845273	49845390	chr13_14777_IP1	3	+	118	3	49845276	intergenic;	--
chr13	82677755	82677950	chr13_15471_IP1	3	+	196	3	82677803	intergenic;	--
chr13	9764168	9764331	chr13_16420_IP1	3	-	164	3	9764184	intron:1.0;	ENSMUSG00000021156.14	Zmynd11	chr13	protein_coding	zinc finger, MYND domain containing 11
chr13	109923290	109923506	chr13_16077_IP1	4	+	217	4	109923405	intron:1.0;	ENSMUSG00000021699.15	Pde4d	chr13	protein_coding	phosphodiesterase 4D, cAMP specific
chr13	91596991	91597192	chr13_15707_IP1	4	+	202	4	91597045	intron:1.0;	ENSMUSG00000003992.12	Ssbp2	chr13	protein_coding	single-stranded DNA binding protein 2
chr13	51123087	51123102	chr13_14793_IP1	5	+	16	5	51123087	five_prime_UTR:1.0;	ENSMUSG00000021395.10	Spin1	chr13	protein_coding	spindlin 1
chr13	95618286	95618389	chr13_18101_IP1	6	-	104	6	95618291	five_prime_UTR:0.15;CDS:0.85;	ENSMUSG00000048376.5	F2r	chr13	protein_coding	coagulation factor II (thrombin) receptor
chr13	38528243	38528467	chr13_14555_IP1	14	+	225	12	38528269	antisense;	ENSMUSG00000038991.14	Txndc5	chr13	protein_coding	thioredoxin domain containing 5
chr13	111488888	111489007	chr13_18477_IP1	4	-	120	4	111488914	intron:1.0;	ENSMUSG00000032745.15	Gpbp1	chr13	protein_coding	GC-rich promoter binding protein 1
chr13	55570765	55571068	chr13_17269_IP1	14	-	304	13	55570925	five_prime_UTR:1.0;	ENSMUSG00000021495.8	Fam193b	chr13	protein_coding	family with sequence similarity 193, member B
chr13	58273509	58273653	chr13_17330_IP1	4	-	145	4	58273514	intron:1.0;	ENSMUSG00000021552.6	Gkap1	chr13	protein_coding	G kinase anchoring protein 1
chr13	24473850	24474140	chr13_16593_IP1	7	-	291	4	24473867	antisense;	ENSMUSG00000016756.14	Cmah	chr13	protein_coding	cytidine monophospho-N-acetylneuraminic acid hydroxylase
chr13	91482720	91482892	chr13_15702_IP1	3	+	173	3	91482745	intron:1.0;	ENSMUSG00000003992.12	Ssbp2	chr13	protein_coding	single-stranded DNA binding protein 2
chr13	97252562	97252865	chr13_15841_IP1	4	+	304	3	97252676	three_prime_UTR:1.0;	ENSMUSG00000041773.7	Enc1	chr13	protein_coding	ectodermal-neural cortex 1
chr13	79280113	79280302	chr13_15383_IP1	4	+	190	4	79280158	intergenic;	--
chr13	46727778	46727932	chr13_14690_IP1	4	+	155	4	46727785	antisense;	ENSMUSG00000021374.9	Nup153	chr13	protein_coding	nucleoporin 153
chr13	55597082	55597315	chr13_14930_IP1	6	+	234	6	55597171	three_prime_UTR:1.0;	ENSMUSG00000058569.7	Tmed9	chr13	protein_coding	transmembrane emp24 protein transport domain containing 9
chr13	103921123	103921411	chr13_18311_IP1	13	-	289	9	103921255	intergenic;	--
chr13	44869884	44869978	chr13_14653_IP1	3	+	95	3	44869896	intron:1.0;	ENSMUSG00000038518.13	Jarid2	chr13	protein_coding	jumonji, AT rich interactive domain 2
chr13	55531180	55531291	chr13_17252_IP1	4	-	112	4	55531180	CDS:1.0;	ENSMUSG00000021494.8	Ddx41	chr13	protein_coding	DEAD (Asp-Glu-Ala-Asp) box polypeptide 41
chr13	112800859	112801004	chr13_16151_IP1	8	+	146	6	112800888	five_prime_UTR:0.77;intron:0.23;	ENSMUSG00000021759.11	Ppap2a	chr13	protein_coding	phosphatidic acid phosphatase type 2A
chr13	49379007	49379197	chr13_14746_IP1	4	+	191	4	49379050	CDS:1.0;	ENSMUSG00000037933.13	Bicd2	chr13	protein_coding	bicaudal D homolog 2 (Drosophila)
chr13	31811498	31811649	chr13_14431_IP1	4	+	152	4	31811516	intergenic;	--
chr13	89880980	89881153	chr13_17969_IP1	3	-	174	3	89881006	intron:1.0;	ENSMUSG00000021615.11	Xrcc4	chr13	protein_coding	X-ray repair complementing defective repair in Chinese hamster cells 4
chr13	82715726	82716018	chr13_17770_IP1	3	-	293	3	82715871	intergenic;	--
chr13	107889804	107889984	chr13_16029_IP1	6	+	181	6	107889859	antisense;	ENSMUSG00000032846.9	Zswim6	chr13	protein_coding	zinc finger SWIM-type containing 6
chr13	118534076	118534340	chr13_18639_IP1	3	-	265	3	118534193	intergenic;	--
chr13	106556785	106557092	chr13_16003_IP1	4	+	308	3	106556899	intergenic;	--
chr13	6935546	6935705	chr13_14044_IP1	3	+	160	3	6935558	intergenic;	--
chr13	9122107	9122115	chr13_14076_IP1	8	+	9	8	9122107	five_prime_UTR:1.0;	ENSMUSG00000033499.11	Larp4b	chr13	protein_coding	La ribonucleoprotein domain family, member 4B
chr13	54693763	54693860	chr13_14870_IP1	4	+	98	4	54693766	antisense;	ENSMUSG00000034928.14	Rnf44	chr13	protein_coding	ring finger protein 44
chr13	92549426	92549605	chr13_15726_IP1	3	+	180	3	92549461	intergenic;	--
chr13	100881493	100881765	chr13_18248_IP1	3	-	273	3	100881619	antisense;	ENSMUSG00000100596.1	Gm29502	chr13	lincRNA	predicted gene 29502
chr13	56094924	56095007	chr13_17292_IP1	4	-	84	4	56094928	intron:1.0;	ENSMUSG00000015937.12	H2afy	chr13	protein_coding	H2A histone family, member Y
chr13	95332621	95332753	chr13_15809_IP1	6	+	133	6	95332636	intron:1.0;	ENSMUSG00000041995.7	Zbed3	chr13	protein_coding	zinc finger, BED type containing 3
chr13	5492201	5492369	chr13_14028_IP1	3	+	169	3	5492223	intergenic;	--
chr13	23622438	23622549	chr13_16575_IP1	23	-	112	23	23622468	five_prime_UTR:0.05;CDS:0.53;intron:0.42;	ENSMUSG00000051627.2	Hist1h1e	chr13	protein_coding	histone cluster 1, H1e
chr13	13673231	13673394	chr13_14167_IP1	3	+	164	3	13673255	CDS:0.85;intron:0.15;	ENSMUSG00000019726.10	Lyst	chr13	protein_coding	lysosomal trafficking regulator
chr13	67627779	67627929	chr13_17486_IP1	3	-	151	3	67627782	intron:1.0;	ENSMUSG00000021510.10	Zfp729a	chr13	protein_coding	zinc finger protein 729a
chr13	100720585	100720653	chr13_18238_IP1	4	-	69	4	100720585	CDS:1.0;	ENSMUSG00000069089.7	Cdk7	chr13	protein_coding	cyclin-dependent kinase 7
chr13	119655587	119655764	chr13_16303_IP1	3	+	178	3	119655617	intergenic;	--
chr13	49379821	49379948	chr13_14748_IP1	4	+	128	4	49379857	CDS:1.0;	ENSMUSG00000037933.13	Bicd2	chr13	protein_coding	bicaudal D homolog 2 (Drosophila)
chr13	82990263	82990431	chr13_15484_IP1	4	+	169	4	82990284	intergenic;	--
chr13	117753262	117753407	chr13_18624_IP1	3	-	146	3	117753265	antisense;	ENSMUSG00000021730.7	Hcn1	chr13	protein_coding	hyperpolarization-activated, cyclic nucleotide-gated K+ 1
chr13	89278784	89278897	chr13_15654_IP1	3	+	114	3	89278787	intron:1.0;	ENSMUSG00000034488.12	Edil3	chr13	protein_coding	EGF-like repeats and discoidin I-like domains 3
chr13	75968770	75969010	chr13_15299_IP1	3	+	241	3	75968864	intron:1.0;	ENSMUSG00000021590.6	Spata9	chr13	protein_coding	spermatogenesis associated 9
chr13	104700866	104700977	chr13_15979_IP1	3	+	112	3	104700869	antisense;	ENSMUSG00000021715.10	Cwc27	chr13	protein_coding	CWC27 spliceosome-associated protein homolog (S. cerevisiae)
chr13	55471893	55472066	chr13_14917_IP1	6	+	174	6	55471920	five_prime_UTR:0.76;CDS:0.24;	ENSMUSG00000034686.7	Prr7	chr13	protein_coding	proline rich 7 (synaptic)
chr13	63565484	63565679	chr13_15108_IP1	3	+	196	3	63565532	antisense;	ENSMUSG00000021466.9	Ptch1	chr13	protein_coding	patched homolog 1
chr13	78866966	78867120	chr13_17691_IP1	3	-	155	3	78866973	intergenic;	--
chr13	106091833	106092065	chr13_15997_IP1	3	+	233	3	106091919	intergenic;	--
chr13	89221871	89221992	chr13_17936_IP1	3	-	122	3	89221874	antisense;	ENSMUSG00000034488.12	Edil3	chr13	protein_coding	EGF-like repeats and discoidin I-like domains 3
chr13	81783388	81783669	chr13_17752_IP1	4	-	282	4	81783522	intron:1.0;	ENSMUSG00000097793.1	Gm17259	chr13	lincRNA	predicted gene, 17259
chr13	62633866	62633998	chr13_15082_IP1	3	+	133	3	62633869	intergenic;	--
chr13	60176493	60176977	chr13_17382_IP1	26	-	485	14	60176612	five_prime_UTR:0.07;CDS:0.93;	ENSMUSG00000052957.7	Gas1	chr13	protein_coding	growth arrest specific 1
chr13	55472192	55472379	chr13_14918_IP1	4	+	188	4	55472277	CDS:1.0;	ENSMUSG00000034686.7	Prr7	chr13	protein_coding	proline rich 7 (synaptic)
chr13	34883254	34883509	chr13_16774_IP1	3	-	256	3	34883363	antisense;	ENSMUSG00000021413.8	Prpf4b	chr13	protein_coding	PRP4 pre-mRNA processing factor 4 homolog B (yeast)
chr13	54681572	54681811	chr13_17183_IP1	14	-	240	12	54681671	three_prime_UTR:0.74;CDS:0.26;	ENSMUSG00000034928.14	Rnf44	chr13	protein_coding	ring finger protein 44
chr13	14183357	14183553	chr13_14185_IP1	4	+	197	4	14183408	intron:1.0;	ENSMUSG00000039219.15	Arid4b	chr13	protein_coding	AT rich interactive domain 4B (RBP1-like)
chr13	52312947	52313189	chr13_17117_IP1	3	-	243	3	52313042	intergenic;	--
chr13	110642033	110642202	chr13_18456_IP1	3	-	170	3	110642055	intergenic;	--
chr13	63300499	63300588	chr13_15102_IP1	3	+	90	3	63300502	intron:1.0;	ENSMUSG00000021458.14	2010111I01Rik	chr13	protein_coding	RIKEN cDNA 2010111I01 gene
chr13	46727596	46727696	chr13_14689_IP1	4	+	101	4	46727612	antisense;	ENSMUSG00000021374.9	Nup153	chr13	protein_coding	nucleoporin 153
chr13	55530720	55530731	chr13_17251_IP1	4	-	12	4	55530728	CDS:1.0;	ENSMUSG00000021494.8	Ddx41	chr13	protein_coding	DEAD (Asp-Glu-Ala-Asp) box polypeptide 41
chr13	40338624	40338777	chr13_16865_IP1	3	-	154	3	40338630	intergenic;	--
chr13	52978359	52978641	chr13_17136_IP1	8	-	283	7	52978469	intron:1.0;	ENSMUSG00000056749.7	Nfil3	chr13	protein_coding	nuclear factor, interleukin 3, regulated
chr13	98814655	98814870	chr13_18167_IP1	10	-	216	10	98814723	intron:1.0;	ENSMUSG00000041685.13	Fcho2	chr13	protein_coding	FCH domain only 2
chr13	24475454	24475639	chr13_14336_IP1	10	+	186	10	24475513	three_prime_UTR:1.0;	ENSMUSG00000016756.14	Cmah	chr13	protein_coding	cytidine monophospho-N-acetylneuraminic acid hydroxylase
chr13	72628335	72628471	chr13_17551_IP1	4	-	137	4	72628344	intergenic;	--
chr13	112505359	112505602	chr13_18502_IP1	3	-	244	3	112505455	antisense;	ENSMUSG00000021756.10	Il6st	chr13	protein_coding	interleukin 6 signal transducer
chr13	54611292	54611450	chr13_14853_IP1	3	+	159	3	54611303	antisense;	ENSMUSG00000047547.12	Cltb	chr13	protein_coding	clathrin, light polypeptide (Lcb)
chr13	70637602	70637704	chr13_15193_IP1	4	+	103	4	70637644	antisense;	ENSMUSG00000034525.6	Ice1	chr13	protein_coding	interactor of little elongation complex ELL subunit 1
chr13	21911323	21911401	chr13_14290_IP1	3	+	79	3	21911329	intergenic;	--
chr13	88168952	88169119	chr13_15614_IP1	3	+	168	3	88168972	intergenic;	--
chr13	105089857	105090065	chr13_15986_IP1	4	+	209	4	105089918	intron:1.0;	ENSMUSG00000021718.5	4933425L06Rik	chr13	protein_coding	RIKEN cDNA 4933425L06 gene
chr13	24280924	24281069	chr13_14327_IP1	3	+	146	3	24280928	intergenic;	--
chr13	98366336	98366531	chr13_15858_IP1	3	+	196	3	98366384	intergenic;	--
chr13	75943538	75943847	chr13_15298_IP1	10	+	310	8	75943671	antisense;	ENSMUSG00000021589.10	Rhobtb3	chr13	protein_coding	Rho-related BTB domain containing 3
chr13	4008823	4009045	chr13_16325_IP1	3	-	223	3	4008902	intergenic;	--
chr13	32236541	32236691	chr13_16724_IP1	3	-	151	3	32236544	intron:1.0;	ENSMUSG00000038372.11	Gmds	chr13	protein_coding	GDP-mannose 4, 6-dehydratase
chr13	112578182	112578255	chr13_16144_IP1	3	+	74	3	112578196	antisense;	ENSMUSG00000050377.7	Il31ra	chr13	protein_coding	interleukin 31 receptor A
chr13	58127402	58127522	chr13_14993_IP1	3	+	121	3	58127405	antisense;	ENSMUSG00000007836.6	Hnrnpa0	chr13	protein_coding	heterogeneous nuclear ribonucleoprotein A0
chr13	110826785	110826962	chr13_18462_IP1	3	-	178	3	110826816	intergenic;	--
chr13	58127244	58127388	chr13_14992_IP1	18	+	145	18	58127315	antisense;	ENSMUSG00000007836.6	Hnrnpa0	chr13	protein_coding	heterogeneous nuclear ribonucleoprotein A0
chr13	84346601	84346634	chr13_15518_IP1	3	+	34	3	84346611	intergenic;	--
chr13	99989604	99989753	chr13_15886_IP1	3	+	150	3	99989606	antisense;	ENSMUSG00000021646.8	Mccc2	chr13	protein_coding	methylcrotonoyl-Coenzyme A carboxylase 2 (beta)
chr13	116179618	116179779	chr13_18587_IP1	3	-	162	3	116179633	intergenic;	--
chr13	55552961	55553234	chr13_17262_IP1	12	-	274	6	55552961	CDS:1.0;	ENSMUSG00000021495.8	Fam193b	chr13	protein_coding	family with sequence similarity 193, member B
chr13	93304120	93304477	chr13_15748_IP1	12	+	358	8	93304168	five_prime_UTR:1.0;	ENSMUSG00000007617.15	Homer1	chr13	protein_coding	homer homolog 1 (Drosophila)
chr13	34037644	34037718	chr13_14460_IP1	4	+	75	4	34037659	five_prime_UTR:0.24;CDS:0.76;	ENSMUSG00000038286.10	Bphl	chr13	protein_coding	biphenyl hydrolase-like (serine hydrolase, breast epithelial mucin-associated antigen)
chr13	3564539	3564680	chr13_14001_IP1	4	+	142	4	3564539	CDS:1.0;	ENSMUSG00000021218.9	Gdi2	chr13	protein_coding	guanosine diphosphate (GDP) dissociation inhibitor 2
chr13	98400533	98400743	chr13_18157_IP1	4	-	211	4	98400629	intergenic;	--
chr13	54738158	54738184	chr13_17199_IP1	3	-	27	3	54738161	CDS:1.0;	ENSMUSG00000069227.4	Gprin1	chr13	protein_coding	G protein-regulated inducer of neurite outgrowth 1
chr13	103743501	103743662	chr13_18296_IP1	4	-	162	4	103743539	three_prime_UTR:0.39;CDS:0.61;	ENSMUSG00000032621.7	Srek1	chr13	protein_coding	splicing regulatory glutamine/lysine-rich protein 1
chr13	87714730	87714882	chr13_15600_IP1	3	+	153	3	87714745	intergenic;	--
chr13	24832041	24832216	chr13_14347_IP1	4	+	176	4	24832133	CDS:0.31;intron:0.69;	ENSMUSG00000035958.2	Tdp2	chr13	protein_coding	tyrosyl-DNA phosphodiesterase 2
chr13	79732002	79732206	chr13_15392_IP1	3	+	205	3	79732060	intergenic;	--
chr13	5425660	5425842	chr13_14026_IP1	3	+	183	3	5425695	intergenic;	--
chr13	94895139	94895327	chr13_18081_IP1	3	-	189	3	94895181	intergenic;	--
chr13	49386011	49386134	chr13_14752_IP1	4	+	124	4	49386044	three_prime_UTR:1.0;	ENSMUSG00000037933.13	Bicd2	chr13	protein_coding	bicaudal D homolog 2 (Drosophila)
chr13	49203717	49203844	chr13_17066_IP1	6	-	128	6	49203728	CDS:0.57;intron:0.43;	ENSMUSG00000037960.10	1110007C09Rik	chr13	protein_coding	RIKEN cDNA 1110007C09 gene
chr13	37826488	37826703	chr13_14521_IP1	6	+	216	6	37826556	intron:1.0;	ENSMUSG00000039087.14	Rreb1	chr13	protein_coding	ras responsive element binding protein 1
chr13	30934827	30935033	chr13_14408_IP1	3	+	207	3	30934886	antisense;	ENSMUSG00000021357.11	Exoc2	chr13	protein_coding	exocyst complex component 2
chr13	86046396	86046503	chr13_17859_IP1	4	-	108	4	86046413	five_prime_UTR:0.6;intron:0.4;	ENSMUSG00000017778.12	Cox7c	chr13	protein_coding	cytochrome c oxidase subunit VIIc
chr13	55635248	55635429	chr13_14940_IP1	4	+	182	4	55635282	intron:1.0;	ENSMUSG00000021500.13	Ddx46	chr13	protein_coding	DEAD (Asp-Glu-Ala-Asp) box polypeptide 46
chr13	59640147	59640284	chr13_17363_IP1	4	-	138	4	59640172	CDS:1.0;	ENSMUSG00000021556.9	Golm1	chr13	protein_coding	golgi membrane protein 1
chr13	32105522	32105734	chr13_16722_IP1	3	-	213	3	32105587	intron:1.0;	ENSMUSG00000038372.11	Gmds	chr13	protein_coding	GDP-mannose 4, 6-dehydratase
chr13	77816918	77817155	chr13_15331_IP1	3	+	238	3	77817009	intron:1.0;	ENSMUSG00000064138.11	Fam172a	chr13	protein_coding	family with sequence similarity 172, member A
chr13	60175922	60176010	chr13_15048_IP1	4	+	89	4	60175964	antisense;	ENSMUSG00000052957.7	Gas1	chr13	protein_coding	growth arrest specific 1
chr13	32911428	32911608	chr13_16734_IP1	3	-	181	3	32911464	intergenic;	--
chr13	84315356	84315560	chr13_15516_IP1	3	+	205	3	84315414	intergenic;	--
chr13	61348062	61348197	chr13_17397_IP1	3	-	136	3	61348065	intergenic;	--
chr13	24758610	24758911	chr13_16597_IP1	4	-	302	3	24758764	intron:1.0;	ENSMUSG00000006715.9	Gmnn	chr13	protein_coding	geminin
chr13	9764163	9764333	chr13_14104_IP1	4	+	171	4	9764186	antisense;	ENSMUSG00000021156.14	Zmynd11	chr13	protein_coding	zinc finger, MYND domain containing 11
chr13	75604403	75604568	chr13_15283_IP1	3	+	166	3	75604421	intergenic;	--
chr13	65095707	65095714	chr13_17458_IP1	4	-	8	4	65095713	CDS:1.0;	ENSMUSG00000038212.13	Hiatl1	chr13	protein_coding	hippocampus abundant transcript-like 1
chr13	104397862	104398007	chr13_15973_IP1	3	+	146	3	104397920	CDS:1.0;	ENSMUSG00000046169.9	Adamts6	chr13	protein_coding	a disintegrin-like and metallopeptidase (reprolysin type) with thrombospondin type 1 motif, 6
chr13	105091788	105091933	chr13_18341_IP1	3	-	146	3	105091791	antisense;	ENSMUSG00000021718.5	4933425L06Rik	chr13	protein_coding	RIKEN cDNA 4933425L06 gene
chr13	82740433	82740581	chr13_15474_IP1	3	+	149	3	82740436	intergenic;	--
chr13	48625396	48625529	chr13_17010_IP1	6	-	134	6	48625434	five_prime_UTR:1.0;	ENSMUSG00000038042.9	Ptpdc1	chr13	protein_coding	protein tyrosine phosphatase domain containing 1
chr12	54795248	54795520	chr12_134707_IP1	4	-	273	4	54795373	CDS:0.18;intron:0.82;	ENSMUSG00000005656.8	Snx6	chr12	protein_coding	sorting nexin 6
chr12	111264174	111264296	chr12_133512_IP1	4	+	123	4	111264192	three_prime_UTR:1.0;	ENSMUSG00000021277.14	Traf3	chr12	protein_coding	TNF receptor-associated factor 3
chr12	108327954	108328120	chr12_136016_IP1	3	-	167	3	108327973	noncoding_exon:0.46;intron:0.54;	ENSMUSG00000097847.1	4930478K11Rik	chr12	lincRNA	RIKEN cDNA 4930478K11 gene
chr12	69184427	69184672	chr12_132295_IP1	14	+	246	10	69184488	five_prime_UTR:0.92;CDS:0.08;	ENSMUSG00000043998.10	Mgat2	chr12	protein_coding	mannoside acetylglucosaminyltransferase 2
chr12	111538209	111538239	chr12_133523_IP1	8	+	31	8	111538234	five_prime_UTR:1.0;	ENSMUSG00000021282.14	Eif5	chr12	protein_coding	eukaryotic translation initiation factor 5
chr12	8674392	8674478	chr12_133982_IP1	4	-	87	4	8674440	antisense;	ENSMUSG00000020594.12	Pum2	chr12	protein_coding	pumilio RNA-binding family member 2
chr12	34240192	34240437	chr12_131478_IP1	3	+	246	3	34240290	intergenic;	--
chr12	113133726	113133871	chr12_133732_IP1	8	+	146	8	113133753	intron:1.0;	ENSMUSG00000021144.12	Mta1	chr12	protein_coding	metastasis associated 1
chr12	80790452	80790795	chr12_135344_IP1	6	-	344	4	80790661	antisense;	ENSMUSG00000021133.8	Susd6	chr12	protein_coding	sushi domain containing 6
chr12	84613780	84613900	chr12_135450_IP1	4	-	121	4	84613784	intron:1.0;	ENSMUSG00000021240.5	Abcd4	chr12	protein_coding	ATP-binding cassette, sub-family D (ALD), member 4
chr12	41356371	41356636	chr12_131621_IP1	4	+	266	4	41356489	intron:1.0;	ENSMUSG00000056899.8	Immp2l	chr12	protein_coding	IMP2 inner mitochondrial membrane peptidase-like (S. cerevisiae)
chr12	28437977	28438124	chr12_134192_IP1	3	-	148	3	28437980	three_prime_UTR:1.0;	ENSMUSG00000020633.11	Dcdc2c	chr12	protein_coding	doublecortin domain containing 2C
chr12	47808568	47808725	chr12_134546_IP1	4	-	158	4	47808578	intergenic;	--
chr12	69681514	69682195	chr12_135071_IP1	29	-	682	10	69681588	five_prime_UTR:0.37;CDS:0.13;intron:0.5;	ENSMUSG00000034801.11	Sos2	chr12	protein_coding	son of sevenless homolog 2 (Drosophila)
chr12	112977999	112978161	chr12_136224_IP1	4	-	163	4	112978040	intron:1.0;	ENSMUSG00000011158.7	Brf1	chr12	protein_coding	BRF1 homolog, subunit of RNA polymerase III transcription initiation factor IIIB (S. cerevisiae)
chr12	110640174	110640265	chr12_136068_IP1	4	-	92	4	110640202	antisense;	ENSMUSG00000018707.11	Dync1h1	chr12	protein_coding	dynein cytoplasmic 1 heavy chain 1
chr12	83795133	83795309	chr12_135397_IP1	6	-	177	6	83795190	three_prime_UTR:1.0;	ENSMUSG00000021224.12	Numb	chr12	protein_coding	numb gene homolog (Drosophila)
chr12	112908079	112908278	chr12_136207_IP1	4	-	200	4	112908141	intergenic;	--
chr12	80790822	80790968	chr12_132658_IP1	3	+	147	3	80790825	intron:1.0;	ENSMUSG00000021133.8	Susd6	chr12	protein_coding	sushi domain containing 6
chr12	42529328	42529609	chr12_131640_IP1	4	+	282	4	42529462	intergenic;	--
chr12	14950910	14951236	chr12_134080_IP1	4	-	327	3	14951089	intergenic;	--
chr12	70045146	70045374	chr12_135094_IP1	4	-	229	4	70045227	CDS:1.0;	ENSMUSG00000021068.13	Nin	chr12	protein_coding	ninein
chr12	45195646	45195685	chr12_134496_IP1	10	-	40	10	45195658	intergenic;	--
chr12	61501152	61501344	chr12_132095_IP1	3	+	193	3	61501199	intergenic;	--
chr12	61330867	61331016	chr12_134849_IP1	3	-	150	3	61330869	intergenic;	--
chr12	21111752	21112110	chr12_131279_IP1	8	+	359	4	21111825	intron:1.0;	ENSMUSG00000090370.3	Gm21989	chr12	processed_transcript	predicted gene 21989
chr12	96455827	96456025	chr12_133051_IP1	3	+	199	3	96455879	intergenic;	--
chr12	44209947	44210089	chr12_134477_IP1	4	-	143	4	44209955	five_prime_UTR:0.85;intron:0.15;	ENSMUSG00000014905.3	Dnajb9	chr12	protein_coding	DnaJ (Hsp40) homolog, subfamily B, member 9
chr12	42755028	42755268	chr12_134446_IP1	4	-	241	4	42755121	intergenic;	--
chr12	7856851	7857090	chr12_131043_IP1	3	+	240	3	7856943	intergenic;	--
chr12	80435270	80435436	chr12_135335_IP1	4	-	167	4	80435332	intron:1.0;	ENSMUSG00000049106.6	Dcaf5	chr12	protein_coding	DDB1 and CUL4 associated factor 5
chr12	51989757	51989880	chr12_134670_IP1	3	-	124	3	51989760	intron:1.0;	ENSMUSG00000020956.12	Dtd2	chr12	protein_coding	D-tyrosyl-tRNA deacylase 2
chr12	96405404	96405619	chr12_133048_IP1	3	+	216	3	96405472	intergenic;	--
chr12	86882939	86883247	chr12_135522_IP1	15	-	309	14	86883042	CDS:1.0;	ENSMUSG00000034168.6	Irf2bpl	chr12	protein_coding	interferon regulatory factor 2 binding protein-like
chr12	65623985	65624120	chr12_132215_IP1	3	+	136	3	65623988	intergenic;	--
chr12	5356895	5357120	chr12_131010_IP1	3	+	226	3	5356973	antisense;	ENSMUSG00000020627.9	Klhl29	chr12	protein_coding	kelch-like 29
chr12	40906236	40906408	chr12_131612_IP1	3	+	173	3	40906261	intergenic;	--
chr12	32318651	32318847	chr12_134247_IP1	3	-	197	3	32318702	intergenic;	--
chr12	75094549	75094725	chr12_135188_IP1	3	-	177	3	75094578	intron:1.0;	ENSMUSG00000034402.2	Kcnh5	chr12	protein_coding	potassium voltage-gated channel, subfamily H (eag-related), member 5
chr12	70100153	70100302	chr12_135096_IP1	3	-	150	3	70100160	intron:1.0;	ENSMUSG00000021068.13	Nin	chr12	protein_coding	ninein
chr12	50226161	50226367	chr12_134619_IP1	4	-	207	4	50226221	intergenic;	--
chr12	92932827	92933013	chr12_135624_IP1	3	-	187	3	92932866	intergenic;	--
chr12	3895607	3895726	chr12_130962_IP1	4	+	120	4	3895619	CDS:1.0;	ENSMUSG00000020661.13	Dnmt3a	chr12	protein_coding	DNA methyltransferase 3A
chr12	81996184	81996320	chr12_132707_IP1	4	+	137	4	81996251	three_prime_UTR:1.0;	ENSMUSG00000021140.8	Pcnx	chr12	protein_coding	pecanex homolog (Drosophila)
chr12	4907348	4907620	chr12_133910_IP1	11	-	273	8	4907387	five_prime_UTR:1.0;	ENSMUSG00000020634.10	Ubxn2a	chr12	protein_coding	UBX domain protein 2A
chr12	61077917	61078080	chr12_132088_IP1	3	+	164	3	61077942	intergenic;	--
chr12	85455314	85455548	chr12_135500_IP1	3	-	235	3	85455402	intergenic;	--
chr12	43012998	43013207	chr12_131651_IP1	3	+	210	3	43013064	intergenic;	--
chr12	51296982	51297218	chr12_134643_IP1	3	-	237	3	51297071	intergenic;	--
chr12	4403700	4403915	chr12_133890_IP1	3	-	216	3	4403769	intron:1.0;	ENSMUSG00000020647.9	Ncoa1	chr12	protein_coding	nuclear receptor coactivator 1
chr12	110545376	110545553	chr12_136063_IP1	3	-	178	3	110545406	antisense;	ENSMUSG00000017843.11	Ppp2r5c	chr12	protein_coding	protein phosphatase 2, regulatory subunit B', gamma
chr12	84149899	84150093	chr12_135405_IP1	9	-	195	9	84149999	three_prime_UTR:1.0;	ENSMUSG00000042507.12	Elmsan1	chr12	protein_coding	ELM2 and Myb/SANT-like domain containing 1
chr12	81860583	81860671	chr12_132684_IP1	4	+	89	4	81860586	intron:1.0;	ENSMUSG00000021140.8	Pcnx	chr12	protein_coding	pecanex homolog (Drosophila)
chr12	103532445	103532573	chr12_133217_IP1	4	+	129	4	103532479	five_prime_UTR:1.0;	ENSMUSG00000021209.10	Ppp4r4	chr12	protein_coding	protein phosphatase 4, regulatory subunit 4
chr12	41353161	41353268	chr12_131620_IP1	4	+	108	4	41353169	intron:1.0;	ENSMUSG00000056899.8	Immp2l	chr12	protein_coding	IMP2 inner mitochondrial membrane peptidase-like (S. cerevisiae)
chr12	80109900	80110064	chr12_135286_IP1	7	-	165	7	80109972	CDS:1.0;	ENSMUSG00000021127.6	Zfp36l1	chr12	protein_coding	zinc finger protein 36, C3H type-like 1
chr12	85121986	85122122	chr12_132814_IP1	8	+	137	8	85122066	CDS:1.0;	ENSMUSG00000004789.9	Dlst	chr12	protein_coding	dihydrolipoamide S-succinyltransferase (E2 component of 2-oxo-glutarate complex)
chr12	73907552	73907663	chr12_132436_IP1	4	+	112	4	73907560	intron:1.0;	ENSMUSG00000021109.11	Hif1a	chr12	protein_coding	hypoxia inducible factor 1, alpha subunit
chr12	89084360	89084550	chr12_135557_IP1	3	-	191	3	89084456	antisense;	ENSMUSG00000066392.9	Nrxn3	chr12	protein_coding	neurexin III
chr12	7897528	7897557	chr12_133956_IP1	3	-	30	3	7897530	intergenic;	--
chr12	91589128	91589257	chr12_132944_IP1	4	+	130	4	91589148	antisense;	ENSMUSG00000020962.11	Gtf2a1	chr12	protein_coding	general transcription factor II A, 1
chr12	61318502	61318628	chr12_132093_IP1	3	+	127	3	61318505	intergenic;	--
chr12	24708559	24708634	chr12_131300_IP1	4	+	76	4	24708608	CDS:1.0;	ENSMUSG00000020649.9	Rrm2	chr12	protein_coding	ribonucleotide reductase M2
chr12	50626926	50627032	chr12_131857_IP1	3	+	107	3	50626929	antisense;	ENSMUSG00000002688.7	Prkd1	chr12	protein_coding	protein kinase D1
chr12	112724623	112724643	chr12_136187_IP1	4	-	21	4	112724623	antisense;	ENSMUSG00000072825.8	Cep170b	chr12	protein_coding	centrosomal protein 170B
chr12	80435537	80435625	chr12_132642_IP1	4	+	89	4	80435563	antisense;	ENSMUSG00000049106.6	Dcaf5	chr12	protein_coding	DDB1 and CUL4 associated factor 5
chr12	98258938	98259118	chr12_135748_IP1	3	-	181	3	98258972	intron:1.0;	ENSMUSG00000021003.9	Galc	chr12	protein_coding	galactosylceramidase
chr12	80339886	80340059	chr12_135322_IP1	4	-	174	4	80339947	CDS:1.0;	ENSMUSG00000049106.6	Dcaf5	chr12	protein_coding	DDB1 and CUL4 associated factor 5
chr12	70042717	70042963	chr12_135092_IP1	4	-	247	4	70042816	CDS:1.0;	ENSMUSG00000021068.13	Nin	chr12	protein_coding	ninein
chr12	84629565	84629723	chr12_132794_IP1	4	+	159	4	84629577	intergenic;	--
chr12	4592860	4593484	chr12_130975_IP1	12	+	625	7	4593152	five_prime_UTR:0.36;intron:0.64;	ENSMUSG00000020640.9	Itsn2	chr12	protein_coding	intersectin 2
chr12	37887828	37888054	chr12_134340_IP1	4	-	227	4	37887908	antisense;	ENSMUSG00000036095.10	Dgkb	chr12	protein_coding	diacylglycerol kinase, beta
chr12	91347756	91347955	chr12_132942_IP1	3	+	200	3	91347810	antisense;	ENSMUSG00000061533.13	Cep128	chr12	protein_coding	centrosomal protein 128
chr12	33983544	33983661	chr12_131472_IP1	4	+	118	4	33983570	intergenic;	--
chr12	13513461	13513554	chr12_131151_IP1	4	+	94	4	13513477	CDS:1.0;	ENSMUSG00000020576.9	Nbas	chr12	protein_coding	neuroblastoma amplified sequence
chr12	102954934	102955145	chr12_135902_IP1	3	-	212	3	102954998	antisense;	ENSMUSG00000021198.14	Unc79	chr12	protein_coding	unc-79 homolog (C. elegans)
chr12	86962075	86962269	chr12_132885_IP1	4	+	195	4	86962188	CDS:1.0;	ENSMUSG00000034157.10	Cipc	chr12	protein_coding	CLOCK interacting protein, circadian
chr12	49384333	49384510	chr12_134592_IP1	4	-	178	4	49384363	antisense;	ENSMUSG00000020950.10	Foxg1	chr12	protein_coding	forkhead box G1
chr12	6193158	6193398	chr12_133928_IP1	3	-	241	3	6193251	intergenic;	--
chr12	108219191	108219221	chr12_133305_IP1	5	+	31	5	108219196	antisense;	ENSMUSG00000084883.1	Ccdc85c	chr12	protein_coding	coiled-coil domain containing 85C
chr12	111772318	111772331	chr12_133559_IP1	5	+	14	5	111772318	five_prime_UTR:0.08;CDS:0.92;	ENSMUSG00000021288.16	Klc1	chr12	protein_coding	kinesin light chain 1
chr12	3236936	3237068	chr12_130921_IP1	3	+	133	3	3236939	noncoding_exon:1.0;	ENSMUSG00000079179.7	Rab10os	chr12	antisense	RAB10, member RAS oncogene family, opposite strand
chr12	110661406	110661569	chr12_133443_IP1	6	+	164	6	110661422	CDS:0.82;intron:0.18;	ENSMUSG00000018707.11	Dync1h1	chr12	protein_coding	dynein cytoplasmic 1 heavy chain 1
chr12	5243012	5243111	chr12_131007_IP1	3	+	100	3	5243015	antisense;	ENSMUSG00000020627.9	Klhl29	chr12	protein_coding	kelch-like 29
chr12	92810010	92810266	chr12_132964_IP1	3	+	257	3	92810120	intergenic;	--
chr12	79018913	79019059	chr12_135255_IP1	3	-	147	3	79018916	intergenic;	--
chr12	39889873	39890032	chr12_131600_IP1	3	+	160	3	39889886	intergenic;	--
chr12	61141403	61141555	chr12_132091_IP1	4	+	153	4	61141408	intergenic;	--
chr12	51983937	51984096	chr12_131887_IP1	4	+	160	4	51983951	intergenic;	--
chr12	3835137	3835260	chr12_130954_IP1	4	+	124	4	3835202	five_prime_UTR:0.49;CDS:0.51;	ENSMUSG00000020661.13	Dnmt3a	chr12	protein_coding	DNA methyltransferase 3A
chr12	108836793	108836875	chr12_133345_IP1	4	+	83	4	108836812	intergenic;	--
chr12	3109915	3110079	chr12_133854_IP1	4	-	165	4	3109962	intergenic;	--
chr12	42642335	42642484	chr12_134441_IP1	3	-	150	3	42642338	intergenic;	--
chr12	50772572	50772796	chr12_131862_IP1	3	+	225	3	50772649	intergenic;	--
chr12	28849960	28850113	chr12_134203_IP1	3	-	154	3	28849973	antisense;	ENSMUSG00000036613.7	Tssc1	chr12	protein_coding	tumor suppressing subtransferable candidate 1
chr12	44502766	44502998	chr12_134479_IP1	3	-	233	3	44502852	antisense;	ENSMUSG00000020598.13	Nrcam	chr12	protein_coding	neuronal cell adhesion molecule
chr12	112773380	112773658	chr12_136194_IP1	10	-	279	9	112773537	CDS:1.0;	ENSMUSG00000072812.4	Ahnak2	chr12	protein_coding	AHNAK nucleoprotein 2
chr12	8326545	8326663	chr12_131054_IP1	5	+	119	5	8326599	intron:1.0;	ENSMUSG00000020605.8	Hs1bp3	chr12	protein_coding	HCLS1 binding protein 3
chr12	110447218	110447358	chr12_136057_IP1	3	-	141	3	110447237	intergenic;	--
chr12	97281648	97281878	chr12_135732_IP1	3	-	231	3	97281731	intergenic;	--
chr12	40136210	40136429	chr12_131602_IP1	3	+	220	3	40136282	intergenic;	--
chr12	94335568	94335711	chr12_135679_IP1	4	-	144	4	94335579	intergenic;	--
chr12	110078067	110078209	chr12_136050_IP1	4	-	143	4	110078091	intergenic;	--
chr12	84996906	84997023	chr12_132800_IP1	4	+	118	4	84996942	CDS:1.0;	ENSMUSG00000021244.13	Ylpm1	chr12	protein_coding	YLP motif containing 1
chr12	76068763	76068893	chr12_135212_IP1	3	-	131	3	76068766	antisense;	ENSMUSG00000063450.12	Syne2	chr12	protein_coding	spectrin repeat containing, nuclear envelope 2
chr12	111575652	111575779	chr12_133540_IP1	4	+	128	4	111575660	intron:1.0;	ENSMUSG00000007411.13	Mark3	chr12	protein_coding	MAP/microtubule affinity regulating kinase 3
chr12	32954150	32954270	chr12_131442_IP1	3	+	121	3	32954195	five_prime_UTR:0.72;intron:0.28;	ENSMUSG00000020570.12	Sypl	chr12	protein_coding	synaptophysin-like protein
chr12	110937480	110937734	chr12_133474_IP1	4	+	255	4	110937597	intron:1.0;	ENSMUSG00000021275.13	Tecpr2	chr12	protein_coding	tectonin beta-propeller repeat containing 2
chr12	6962461	6962636	chr12_133945_IP1	3	-	176	3	6962489	intergenic;	--
chr12	84919660	84919799	chr12_135465_IP1	3	-	140	3	84919663	three_prime_UTR:1.0;	ENSMUSG00000042350.11	Arel1	chr12	protein_coding	apoptosis resistant E3 ubiquitin protein ligase 1
chr12	35729380	35729657	chr12_134305_IP1	3	-	278	3	35729513	intergenic;	--
chr12	67392281	67392470	chr12_135008_IP1	3	-	190	3	67392324	intergenic;	--
chr12	8298290	8298356	chr12_133962_IP1	3	-	67	3	8298293	CDS:1.0;	ENSMUSG00000037660.4	Gdf7	chr12	protein_coding	growth differentiation factor 7
chr12	84603983	84604025	chr12_135444_IP1	4	-	43	4	84604017	CDS:1.0;	ENSMUSG00000021240.5	Abcd4	chr12	protein_coding	ATP-binding cassette, sub-family D (ALD), member 4
chr12	84192777	84192968	chr12_135421_IP1	4	-	192	4	84192821	intron:1.0;	ENSMUSG00000042507.12	Elmsan1	chr12	protein_coding	ELM2 and Myb/SANT-like domain containing 1
chr12	83549177	83549354	chr12_135386_IP1	3	-	178	3	83549207	intron:1.0;	ENSMUSG00000042628.7	Zfyve1	chr12	protein_coding	zinc finger, FYVE domain containing 1
chr12	83697216	83697378	chr12_132753_IP1	3	+	163	3	83697232	intron:1.0;	ENSMUSG00000019969.11	Psen1	chr12	protein_coding	presenilin 1
chr12	71086454	71086629	chr12_132370_IP1	4	+	176	4	71086482	CDS:1.0;	ENSMUSG00000048118.15	Arid4a	chr12	protein_coding	AT rich interactive domain 4A (RBP1-like)
chr12	102878218	102878459	chr12_135899_IP1	11	-	242	9	102878327	five_prime_UTR:0.78;intron:0.22;	ENSMUSG00000041702.6	Btbd7	chr12	protein_coding	BTB (POZ) domain containing 7
chr12	8630391	8630621	chr12_133977_IP1	3	-	231	3	8630476	intergenic;	--
chr12	44993862	44994014	chr12_134487_IP1	3	-	153	3	44993867	intron:1.0;	ENSMUSG00000046314.13	Stxbp6	chr12	protein_coding	syntaxin binding protein 6 (amisyn)
chr12	86883294	86883483	chr12_135523_IP1	16	-	190	16	86883336	CDS:1.0;	ENSMUSG00000034168.6	Irf2bpl	chr12	protein_coding	interferon regulatory factor 2 binding protein-like
chr12	19672099	19672265	chr12_131269_IP1	3	+	167	3	19672119	intergenic;	--
chr12	62193399	62193724	chr12_132121_IP1	4	+	326	3	62193533	intergenic;	--
chr12	43426796	43427019	chr12_131662_IP1	3	+	224	3	43426873	intergenic;	--
chr12	98733473	98733612	chr12_135759_IP1	3	-	140	3	98733473	CDS:1.0;	ENSMUSG00000021009.12	Ptpn21	chr12	protein_coding	protein tyrosine phosphatase, non-receptor type 21
chr12	113131572	113131762	chr12_133726_IP1	6	+	191	6	113131680	CDS:1.0;	ENSMUSG00000021144.12	Mta1	chr12	protein_coding	metastasis associated 1
chr12	81962637	81962729	chr12_132695_IP1	4	+	93	4	81962668	CDS:1.0;	ENSMUSG00000021140.8	Pcnx	chr12	protein_coding	pecanex homolog (Drosophila)
chr12	70465998	70466222	chr12_132327_IP1	3	+	225	3	70466075	three_prime_UTR:0.29;CDS:0.71;	ENSMUSG00000021072.10	Tmx1	chr12	protein_coding	thioredoxin-related transmembrane protein 1
chr12	112611421	112611685	chr12_133622_IP1	10	+	265	8	112611535	CDS:1.0;	ENSMUSG00000037679.8	Inf2	chr12	protein_coding	inverted formin, FH2 and WH2 domain containing
chr12	3849634	3849674	chr12_130955_IP1	4	+	41	4	3849634	CDS:1.0;	ENSMUSG00000020661.13	Dnmt3a	chr12	protein_coding	DNA methyltransferase 3A
chr12	98259134	98259253	chr12_135749_IP1	4	-	120	4	98259137	CDS:1.0;	ENSMUSG00000021003.9	Galc	chr12	protein_coding	galactosylceramidase
chr12	8498772	8499194	chr12_133972_IP1	23	-	423	13	8498941	three_prime_UTR:0.64;CDS:0.36;	ENSMUSG00000054364.4	Rhob	chr12	protein_coding	ras homolog gene family, member B
chr12	50011783	50011999	chr12_131839_IP1	4	+	217	4	50011862	intergenic;	--
chr12	104751934	104751960	chr12_133236_IP1	5	+	27	5	104751934	antisense;	ENSMUSG00000041415.9	Dicer1	chr12	protein_coding	dicer 1, ribonuclease type III
chr12	110666293	110666369	chr12_133451_IP1	6	+	77	6	110666293	CDS:1.0;	ENSMUSG00000018707.11	Dync1h1	chr12	protein_coding	dynein cytoplasmic 1 heavy chain 1
chr12	59760603	59760782	chr12_132051_IP1	3	+	180	3	59760635	intergenic;	--
chr12	32677526	32677705	chr12_131432_IP1	4	+	180	4	32677562	intergenic;	--
chr12	108274474	108274633	chr12_133306_IP1	3	+	160	3	108274531	antisense;	ENSMUSG00000084883.1	Ccdc85c	chr12	protein_coding	coiled-coil domain containing 85C
chr12	36109663	36109875	chr12_134311_IP1	5	-	213	5	36109788	CDS:0.81;intron:0.19;	ENSMUSG00000020547.4	Bzw2	chr12	protein_coding	basic leucine zipper and W2 domains 2
chr12	83688394	83688612	chr12_132752_IP1	4	+	219	4	83688487	intron:1.0;	ENSMUSG00000019969.11	Psen1	chr12	protein_coding	presenilin 1
chr12	85226164	85226252	chr12_132821_IP1	4	+	89	4	85226176	three_prime_UTR:1.0;	ENSMUSG00000004788.9	Eif2b2	chr12	protein_coding	eukaryotic translation initiation factor 2B, subunit 2 beta
chr12	67744058	67744252	chr12_135017_IP1	3	-	195	3	67744105	intergenic;	--
chr12	100520652	100520852	chr12_135821_IP1	11	-	201	11	100520719	five_prime_UTR:0.66;CDS:0.2;intron:0.15;	ENSMUSG00000033530.7	Ttc7b	chr12	protein_coding	tetratricopeptide repeat domain 7B
chr12	111758797	111759042	chr12_133557_IP1	21	+	246	21	111758935	five_prime_UTR:0.79;intron:0.21;	ENSMUSG00000021288.16	Klc1	chr12	protein_coding	kinesin light chain 1
chr12	94512189	94512394	chr12_135685_IP1	3	-	206	3	94512247	intergenic;	--
chr12	82170227	82170377	chr12_132713_IP1	4	+	151	4	82170254	intron:1.0;	ENSMUSG00000042700.13	Sipa1l1	chr12	protein_coding	signal-induced proliferation-associated 1 like 1
chr12	110480839	110480913	chr12_136059_IP1	3	-	75	3	110480842	intergenic;	--
chr12	115889209	115889399	chr12_133789_IP1	3	+	191	3	115889252	intergenic;	--
chr12	67170473	67170603	chr12_134998_IP1	3	-	131	3	67170476	intron:1.0;	ENSMUSG00000034912.14	Mdga2	chr12	protein_coding	MAM domain containing glycosylphosphatidylinositol anchor 2
chr12	60579394	60579617	chr12_132070_IP1	3	+	224	3	60579470	intergenic;	--
chr12	73473647	73473808	chr12_132433_IP1	3	+	162	3	73473661	intergenic;	--
chr12	13558611	13558649	chr12_131155_IP1	3	+	39	3	13558611	CDS:1.0;	ENSMUSG00000020576.9	Nbas	chr12	protein_coding	neuroblastoma amplified sequence
chr12	49259989	49260171	chr12_134583_IP1	3	-	183	3	49260025	intergenic;	--
chr12	64384354	64384569	chr12_132189_IP1	3	+	216	3	64384422	intergenic;	--
chr12	12237422	12237615	chr12_134036_IP1	3	-	194	3	12237468	intergenic;	--
chr12	69801561	69801682	chr12_132318_IP1	3	+	122	3	69801564	intron:1.0;	ENSMUSG00000020992.4	4930512B01Rik	chr12	antisense	RIKEN cDNA 4930512B01 gene
chr12	55836738	55836874	chr12_131961_IP1	6	+	137	6	55836779	intron:1.0;	ENSMUSG00000012076.7	Brms1l	chr12	protein_coding	breast cancer metastasis-suppressor 1-like
chr12	14968319	14968540	chr12_131175_IP1	3	+	222	3	14968393	intergenic;	--
chr12	60801542	60801940	chr12_134835_IP1	4	-	399	3	60801685	intergenic;	--
chr12	28702068	28702229	chr12_134196_IP1	3	-	162	3	28702085	intron:1.0;	ENSMUSG00000020628.13	Trappc12	chr12	protein_coding	trafficking protein particle complex 12
chr12	60604709	60604914	chr12_134828_IP1	3	-	206	3	60604767	intergenic;	--
chr12	85474934	85475072	chr12_132828_IP1	4	+	139	4	85474991	CDS:1.0;	ENSMUSG00000021250.11	Fos	chr12	protein_coding	FBJ osteosarcoma oncogene
chr12	78511676	78511967	chr12_135247_IP1	7	-	292	6	78511820	antisense;	ENSMUSG00000047454.9	Gphn	chr12	protein_coding	gephyrin
chr12	76369475	76369733	chr12_135220_IP1	6	-	259	5	76369486	five_prime_UTR:0.49;intron:0.51;	ENSMUSG00000056459.12	Zbtb25	chr12	protein_coding	zinc finger and BTB domain containing 25
chr12	10619828	10620066	chr12_134011_IP1	4	-	239	4	10619919	intergenic;	--
chr12	108794184	108794510	chr12_136027_IP1	6	-	327	5	108794363	antisense;	ENSMUSG00000021264.11	Yy1	chr12	protein_coding	YY1 transcription factor
chr12	18527832	18528050	chr12_134120_IP1	3	-	219	3	18527907	antisense;	ENSMUSG00000073197.6	5730507C01Rik	chr12	protein_coding	RIKEN cDNA 5730507C01 gene
chr12	80110361	80110548	chr12_135287_IP1	6	-	188	6	80110434	CDS:1.0;	ENSMUSG00000021127.6	Zfp36l1	chr12	protein_coding	zinc finger protein 36, C3H type-like 1
chr12	110883409	110883520	chr12_136078_IP1	3	-	112	3	110883412	intron:1.0;	ENSMUSG00000021276.9	Cinp	chr12	protein_coding	cyclin-dependent kinase 2 interacting protein
chr12	54203538	54203682	chr12_134696_IP1	4	-	145	4	54203555	five_prime_UTR:0.84;CDS:0.16;	ENSMUSG00000035105.5	Egln3	chr12	protein_coding	egl-9 family hypoxia-inducible factor 3
chr12	50968364	50968602	chr12_131864_IP1	4	+	239	4	50968456	intergenic;	--
chr12	59086483	59086688	chr12_134802_IP1	4	-	206	4	59086541	intergenic;	--
chr12	73046416	73046698	chr12_135145_IP1	10	-	283	9	73046518	five_prime_UTR:0.96;CDS:0.04;	ENSMUSG00000051367.8	Six1	chr12	protein_coding	sine oculis-related homeobox 1
chr12	106697516	106697736	chr12_135972_IP1	3	-	221	3	106697589	intron:1.0;	ENSMUSG00000085820.5	4933406K04Rik	chr12	lincRNA	RIKEN cDNA 4933406K04 gene
chr12	44269236	44269374	chr12_131683_IP1	4	+	139	4	44269277	five_prime_UTR:0.47;intron:0.53;	ENSMUSG00000036257.12	Pnpla8	chr12	protein_coding	patatin-like phospholipase domain containing 8
chr12	49384652	49384993	chr12_134593_IP1	26	-	342	20	49384684	antisense;	ENSMUSG00000020950.10	Foxg1	chr12	protein_coding	forkhead box G1
chr12	33147452	33147569	chr12_134260_IP1	4	-	118	4	33147459	noncoding_exon:1.0;	ENSMUSG00000052125.14	F730043M19Rik	chr12	processed_transcript	RIKEN cDNA F730043M19 gene
chr12	112722146	112722382	chr12_136186_IP1	8	-	237	6	112722261	antisense;	ENSMUSG00000072825.8	Cep170b	chr12	protein_coding	centrosomal protein 170B
chr12	21416968	21417162	chr12_134138_IP1	7	-	195	7	21417080	five_prime_UTR:0.21;CDS:0.63;intron:0.16;	ENSMUSG00000076432.10	Ywhaq	chr12	protein_coding	tyrosine 3-monooxygenase/tryptophan 5-monooxygenase activation protein, theta polypeptide
chr12	63806824	63807024	chr12_132169_IP1	3	+	201	3	63806880	intergenic;	--
chr12	110933018	110933154	chr12_133472_IP1	4	+	137	4	110933087	CDS:1.0;	ENSMUSG00000021275.13	Tecpr2	chr12	protein_coding	tectonin beta-propeller repeat containing 2
chr12	59984605	59984938	chr12_132059_IP1	4	+	334	3	59984722	intergenic;	--
chr12	111805479	111805682	chr12_133587_IP1	5	+	204	5	111805535	intron:1.0;	ENSMUSG00000021288.16	Klc1	chr12	protein_coding	kinesin light chain 1
chr12	53253120	53253253	chr12_134682_IP1	3	-	134	3	53253123	antisense;	ENSMUSG00000021010.7	Npas3	chr12	protein_coding	neuronal PAS domain protein 3
chr12	109053001	109053056	chr12_136036_IP1	3	-	56	3	109053004	intron:1.0;	ENSMUSG00000040867.11	Begain	chr12	protein_coding	brain-enriched guanylate kinase-associated
chr12	66689653	66689807	chr12_134981_IP1	3	-	155	3	66689665	intron:1.0;	ENSMUSG00000034912.14	Mdga2	chr12	protein_coding	MAM domain containing glycosylphosphatidylinositol anchor 2
chr12	52475056	52475295	chr12_131893_IP1	3	+	240	3	52475148	intergenic;	--
chr12	110082867	110083185	chr12_136051_IP1	4	-	319	3	110083042	intergenic;	--
chr12	84317429	84317639	chr12_132776_IP1	4	+	211	4	84317492	intron:1.0;	ENSMUSG00000042472.10	Zfp410	chr12	protein_coding	zinc finger protein 410
chr12	102743736	102743952	chr12_133202_IP1	7	+	217	7	102743806	five_prime_UTR:0.89;intron:0.11;	ENSMUSG00000046675.6	Tmem251	chr12	protein_coding	transmembrane protein 251
chr12	60283614	60283893	chr12_132064_IP1	4	+	280	3	60283700	intergenic;	--
chr12	86883321	86883422	chr12_132877_IP1	4	+	102	4	86883332	antisense;	ENSMUSG00000034168.6	Irf2bpl	chr12	protein_coding	interferon regulatory factor 2 binding protein-like
chr12	49297872	49298056	chr12_134585_IP1	3	-	185	3	49297922	intergenic;	--
chr12	45195648	45195687	chr12_131698_IP1	5	+	40	5	45195665	intergenic;	--
chr12	43913766	43914036	chr12_134472_IP1	4	-	271	4	43913889	intergenic;	--
chr12	49391303	49391451	chr12_131822_IP1	4	+	149	4	49391310	three_prime_UTR:1.0;	ENSMUSG00000089922.2	3110039M20Rik	chr12	protein_coding	RIKEN cDNA 3110039M20 gene
chr12	39535052	39535199	chr12_131595_IP1	3	+	148	3	39535055	intergenic;	--
chr12	113014437	113014682	chr12_133684_IP1	6	+	246	5	113014481	five_prime_UTR:0.23;CDS:0.49;intron:0.29;	ENSMUSG00000021143.9	Pacs2	chr12	protein_coding	phosphofurin acidic cluster sorting protein 2
chr12	51971146	51971287	chr12_134669_IP1	3	-	142	3	51971202	five_prime_UTR:0.6;intron:0.4;	ENSMUSG00000035181.5	Heatr5a	chr12	protein_coding	HEAT repeat containing 5A
chr12	55599645	55599823	chr12_131955_IP1	8	+	179	8	55599687	CDS:1.0;	ENSMUSG00000045440.3	Insm2	chr12	protein_coding	insulinoma-associated 2
chr12	110889322	110889613	chr12_133468_IP1	9	+	292	7	110889466	five_prime_UTR:0.01;intron:0.99;	ENSMUSG00000021275.13	Tecpr2	chr12	protein_coding	tectonin beta-propeller repeat containing 2
chr12	39411142	39411335	chr12_134368_IP1	3	-	194	3	39411188	intergenic;	--
chr12	95363433	95363583	chr12_133025_IP1	3	+	151	3	95363436	intergenic;	--
chr12	85374294	85374445	chr12_132825_IP1	4	+	152	3	85374440	antisense;	ENSMUSG00000021248.8	Tmed10	chr12	protein_coding	transmembrane emp24-like trafficking protein 10 (yeast)
chr12	81995087	81995259	chr12_132704_IP1	4	+	173	4	81995133	CDS:1.0;	ENSMUSG00000021140.8	Pcnx	chr12	protein_coding	pecanex homolog (Drosophila)
chr12	7897530	7897557	chr12_131044_IP1	4	+	28	4	7897530	intergenic;	--
chr12	99229015	99229227	chr12_135775_IP1	3	-	213	3	99229080	intron:1.0;	ENSMUSG00000033713.9	Foxn3	chr12	protein_coding	forkhead box N3
chr12	10719587	10719812	chr12_134012_IP1	3	-	226	3	10719665	intergenic;	--
chr12	3235639	3235815	chr12_130920_IP1	3	+	177	3	3235668	noncoding_exon:1.0;	ENSMUSG00000079179.7	Rab10os	chr12	antisense	RAB10, member RAS oncogene family, opposite strand
chr12	53253550	53253721	chr12_131912_IP1	7	+	172	7	53253574	intron:1.0;	ENSMUSG00000021010.7	Npas3	chr12	protein_coding	neuronal PAS domain protein 3
chr12	81994887	81994944	chr12_132702_IP1	4	+	58	4	81994887	CDS:1.0;	ENSMUSG00000021140.8	Pcnx	chr12	protein_coding	pecanex homolog (Drosophila)
chr12	28700194	28700342	chr12_131363_IP1	3	+	149	3	28700197	antisense;	ENSMUSG00000020628.13	Trappc12	chr12	protein_coding	trafficking protein particle complex 12
chr12	98733760	98733834	chr12_135760_IP1	5	-	75	5	98733795	five_prime_UTR:1.0;	ENSMUSG00000021009.12	Ptpn21	chr12	protein_coding	protein tyrosine phosphatase, non-receptor type 21
chr12	110738270	110738373	chr12_136072_IP1	5	-	104	5	110738273	antisense;	ENSMUSG00000037957.12	Wdr20	chr12	protein_coding	WD repeat domain 20
chr12	112644868	112645012	chr12_133631_IP1	4	+	145	4	112644905	five_prime_UTR:0.68;CDS:0.32;	ENSMUSG00000064326.10	Siva1	chr12	protein_coding	SIVA1, apoptosis-inducing factor
chr12	44802639	44802789	chr12_131691_IP1	3	+	151	3	44802642	intergenic;	--
chr12	96621942	96622210	chr12_133057_IP1	3	+	269	3	96622063	intergenic;	--
chr12	31297633	31297744	chr12_131409_IP1	4	+	112	4	31297650	CDS:1.0;	ENSMUSG00000002900.13	Lamb1	chr12	protein_coding	laminin B1
chr12	37111547	37111843	chr12_131534_IP1	4	+	297	3	37111660	intron:1.0;	ENSMUSG00000036144.6	Meox2	chr12	protein_coding	mesenchyme homeobox 2
chr12	44583180	44583405	chr12_131690_IP1	4	+	226	4	44583259	intron:1.0;	ENSMUSG00000020598.13	Nrcam	chr12	protein_coding	neuronal cell adhesion molecule
chr12	64258813	64259050	chr12_132185_IP1	3	+	238	3	64258903	intergenic;	--
chr12	108202166	108202363	chr12_133301_IP1	3	+	198	3	108202216	CDS:1.0;	ENSMUSG00000021258.9	Ccnk	chr12	protein_coding	cyclin K
chr12	42384887	42385030	chr12_131634_IP1	3	+	144	3	42384890	intergenic;	--
chr12	95352775	95352996	chr12_133024_IP1	3	+	222	3	95352850	intergenic;	--
chr12	101818790	101818892	chr12_135846_IP1	3	-	103	3	101818811	five_prime_UTR:1.0;	ENSMUSG00000021186.8	Fbln5	chr12	protein_coding	fibulin 5
chr12	50697375	50697498	chr12_131860_IP1	3	+	124	3	50697378	intergenic;	--
chr12	61322763	61323094	chr12_134848_IP1	4	-	332	3	61322883	intergenic;	--
chr12	48678635	48678796	chr12_134570_IP1	3	-	162	3	48678649	intergenic;	--
chr12	16811013	16811204	chr12_131196_IP1	4	+	192	4	16811057	five_prime_UTR:1.0;	ENSMUSG00000057469.7	E2f6	chr12	protein_coding	E2F transcription factor 6
chr12	78218603	78218822	chr12_135238_IP1	3	-	220	3	78218676	intergenic;	--
chr12	57542599	57542619	chr12_131999_IP1	3	+	21	3	57542601	antisense;	ENSMUSG00000035451.6	Foxa1	chr12	protein_coding	forkhead box A1
chr12	17806703	17806848	chr12_131258_IP1	3	+	146	3	17806706	intergenic;	--
chr12	14054389	14054545	chr12_131159_IP1	3	+	157	3	14054398	intergenic;	--
chr12	119772038	119772286	chr12_133849_IP1	4	+	249	4	119772139	intergenic;	--
chr12	96468402	96468565	chr12_135713_IP1	3	-	164	3	96468418	intergenic;	--
chr12	111794271	111794531	chr12_133577_IP1	5	+	261	5	111794384	intron:1.0;	ENSMUSG00000021288.16	Klc1	chr12	protein_coding	kinesin light chain 1
chr12	63816422	63816675	chr12_134909_IP1	3	-	254	3	63816528	intergenic;	--
chr12	84604332	84604385	chr12_135445_IP1	4	-	54	4	84604332	CDS:1.0;	ENSMUSG00000021240.5	Abcd4	chr12	protein_coding	ATP-binding cassette, sub-family D (ALD), member 4
chr12	3909521	3909665	chr12_130964_IP1	4	+	145	4	3909551	three_prime_UTR:1.0;	ENSMUSG00000020661.13	Dnmt3a	chr12	protein_coding	DNA methyltransferase 3A
chr12	86089566	86089685	chr12_132856_IP1	4	+	120	4	86089598	intron:1.0;	ENSMUSG00000007867.8	Ift43	chr12	protein_coding	intraflagellar transport 43
chr12	84174397	84174423	chr12_135420_IP1	6	-	27	6	84174404	five_prime_UTR:1.0;	ENSMUSG00000042507.12	Elmsan1	chr12	protein_coding	ELM2 and Myb/SANT-like domain containing 1
chr12	111574743	111574987	chr12_136135_IP1	6	-	245	4	111574888	antisense;	ENSMUSG00000007411.13	Mark3	chr12	protein_coding	MAP/microtubule affinity regulating kinase 3
chr12	42702086	42702261	chr12_134444_IP1	3	-	176	3	42702114	intergenic;	--
chr12	51260174	51260277	chr12_134642_IP1	3	-	104	3	51260177	intergenic;	--
chr12	76370223	76370441	chr12_132518_IP1	5	+	219	4	76370230	five_prime_UTR:0.81;intron:0.19;	ENSMUSG00000033454.6	Zbtb1	chr12	protein_coding	zinc finger and BTB domain containing 1
chr12	109135538	109135676	chr12_133367_IP1	3	+	139	3	109135541	intergenic;	--
chr12	52528585	52528738	chr12_131897_IP1	3	+	154	3	52528591	intron:1.0;	ENSMUSG00000035133.8	Arhgap5	chr12	protein_coding	Rho GTPase activating protein 5
chr12	64063633	64063816	chr12_134919_IP1	3	-	184	3	64063670	intergenic;	--
chr12	38458312	38458538	chr12_131578_IP1	3	+	227	3	38458430	intron:1.0;	ENSMUSG00000036095.10	Dgkb	chr12	protein_coding	diacylglycerol kinase, beta
chr12	53511344	53511630	chr12_131917_IP1	3	+	287	3	53511484	intron:1.0;	ENSMUSG00000021010.7	Npas3	chr12	protein_coding	neuronal PAS domain protein 3
chr12	24651800	24651976	chr12_134148_IP1	3	-	177	3	24651831	antisense;	ENSMUSG00000020653.9	Klf11	chr12	protein_coding	Kruppel-like factor 11
chr12	45720487	45720779	chr12_131702_IP1	3	+	293	3	45720632	intergenic;	--
chr12	98706989	98707234	chr12_135757_IP1	4	-	246	4	98707087	intron:1.0;	ENSMUSG00000021009.12	Ptpn21	chr12	protein_coding	protein tyrosine phosphatase, non-receptor type 21
chr12	83596944	83597088	chr12_135390_IP1	6	-	145	6	83596996	five_prime_UTR:0.64;intron:0.36;	ENSMUSG00000042628.7	Zfyve1	chr12	protein_coding	zinc finger, FYVE domain containing 1
chr12	70349179	70349324	chr12_132323_IP1	3	+	146	3	70349182	intergenic;	--
chr12	51829224	51829689	chr12_134662_IP1	38	-	466	29	51829422	five_prime_UTR:0.67;intron:0.33;	ENSMUSG00000035247.13	Hectd1	chr12	protein_coding	HECT domain containing 1
chr12	97846431	97846568	chr12_133080_IP1	3	+	138	3	97846434	intergenic;	--
chr12	37913402	37913607	chr12_131554_IP1	4	+	206	4	37913484	intron:1.0;	ENSMUSG00000036095.10	Dgkb	chr12	protein_coding	diacylglycerol kinase, beta
chr12	92924456	92924601	chr12_132966_IP1	3	+	146	3	92924459	intergenic;	--
chr12	32651591	32651860	chr12_131431_IP1	3	+	270	3	32651713	intergenic;	--
chr12	91479016	91479156	chr12_135597_IP1	3	-	141	3	91479019	antisense;	ENSMUSG00000020963.12	Tshr	chr12	protein_coding	thyroid stimulating hormone receptor
chr12	80434958	80435175	chr12_135334_IP1	4	-	218	4	80435028	intron:1.0;	ENSMUSG00000049106.6	Dcaf5	chr12	protein_coding	DDB1 and CUL4 associated factor 5
chr12	31265341	31265447	chr12_131406_IP1	4	+	107	4	31265389	five_prime_UTR:0.75;CDS:0.25;	ENSMUSG00000002900.13	Lamb1	chr12	protein_coding	laminin B1
chr12	110618123	110618244	chr12_133404_IP1	6	+	122	6	110618167	CDS:1.0;	ENSMUSG00000018707.11	Dync1h1	chr12	protein_coding	dynein cytoplasmic 1 heavy chain 1
chr12	113056861	113056955	chr12_133690_IP1	4	+	95	4	113056875	CDS:1.0;	ENSMUSG00000021143.9	Pacs2	chr12	protein_coding	phosphofurin acidic cluster sorting protein 2
chr12	111113911	111114046	chr12_133493_IP1	6	+	136	6	111113978	three_prime_UTR:1.0;	ENSMUSG00000037896.15	Rcor1	chr12	protein_coding	REST corepressor 1
chr12	99196376	99196613	chr12_135772_IP1	5	-	238	5	99196478	CDS:1.0;	ENSMUSG00000033713.9	Foxn3	chr12	protein_coding	forkhead box N3
chr12	70946635	70946820	chr12_132352_IP1	4	+	186	4	70946673	intron:1.0;	ENSMUSG00000021076.5	Actr10	chr12	protein_coding	ARP10 actin-related protein 10
chr12	50188744	50188942	chr12_131843_IP1	3	+	199	3	50188795	intergenic;	--
chr12	4858414	4858645	chr12_130996_IP1	4	+	232	4	4858548	intergenic;	--
chr12	58534313	58534522	chr12_134790_IP1	3	-	210	3	58534375	intergenic;	--
chr12	118449493	118449731	chr12_136302_IP1	3	-	239	3	118449585	intergenic;	--
chr12	28716074	28716142	chr12_134198_IP1	4	-	69	4	28716081	intron:1.0;	ENSMUSG00000020628.13	Trappc12	chr12	protein_coding	trafficking protein particle complex 12
chr12	44186667	44186888	chr12_134475_IP1	4	-	222	4	44186741	intergenic;	--
chr12	76370098	76370502	chr12_135222_IP1	10	-	405	6	76370290	antisense;	ENSMUSG00000033454.6	Zbtb1	chr12	protein_coding	zinc finger and BTB domain containing 1
chr12	24651367	24651521	chr12_131295_IP1	4	+	155	4	24651425	five_prime_UTR:0.98;intron:0.02;	ENSMUSG00000020653.9	Klf11	chr12	protein_coding	Kruppel-like factor 11
chr12	87200085	87200232	chr12_135534_IP1	3	-	148	3	87200129	five_prime_UTR:0.18;CDS:0.8;intron:0.02;	ENSMUSG00000034111.5	Tmed8	chr12	protein_coding	transmembrane emp24 domain containing 8
chr12	111574437	111574598	chr12_136134_IP1	6	-	162	4	111574504	antisense;	ENSMUSG00000007411.13	Mark3	chr12	protein_coding	MAP/microtubule affinity regulating kinase 3
chr12	48111782	48112067	chr12_131779_IP1	4	+	286	3	48111822	intergenic;	--
chr12	75700049	75700189	chr12_132476_IP1	3	+	141	3	75700052	intergenic;	--
chr12	111263503	111263662	chr12_133510_IP1	6	+	160	6	111263515	three_prime_UTR:1.0;	ENSMUSG00000021277.14	Traf3	chr12	protein_coding	TNF receptor-associated factor 3
chr12	54944317	54944569	chr12_134718_IP1	4	-	253	4	54944425	intron:1.0;	ENSMUSG00000035021.11	Baz1a	chr12	protein_coding	bromodomain adjacent to zinc finger domain 1A
chr12	26456070	26456403	chr12_134174_IP1	9	-	334	7	26456277	CDS:1.0;	ENSMUSG00000020641.13	Rsad2	chr12	protein_coding	radical S-adenosyl methionine domain containing 2
chr12	16894946	16895543	chr12_131199_IP1	62	+	598	36	16895051	five_prime_UTR:0.36;CDS:0.24;intron:0.41;	ENSMUSG00000020580.9	Rock2	chr12	protein_coding	Rho-associated coiled-coil containing protein kinase 2
chr12	91720652	91720791	chr12_132946_IP1	3	+	140	3	91720655	antisense;	ENSMUSG00000020961.12	Ston2	chr12	protein_coding	stonin 2
chr12	102878142	102878392	chr12_133206_IP1	4	+	251	3	102878330	antisense;	ENSMUSG00000041702.6	Btbd7	chr12	protein_coding	BTB (POZ) domain containing 7
chr12	78227284	78227396	chr12_132572_IP1	6	+	113	6	78227310	intron:1.0;	ENSMUSG00000047454.9	Gphn	chr12	protein_coding	gephyrin
chr12	4476820	4476936	chr12_130974_IP1	6	+	117	6	4476862	antisense;	ENSMUSG00000020647.9	Ncoa1	chr12	protein_coding	nuclear receptor coactivator 1
chr12	109254704	109254905	chr12_133371_IP1	3	+	202	3	109254760	intergenic;	--
chr12	73982477	73982579	chr12_132444_IP1	3	+	103	3	73982482	CDS:1.0;	ENSMUSG00000021113.4	Snapc1	chr12	protein_coding	small nuclear RNA activating complex, polypeptide 1
chr12	6717889	6718094	chr12_133939_IP1	3	-	206	3	6717947	intergenic;	--
chr12	73196516	73196727	chr12_132420_IP1	3	+	212	3	73196580	intron:1.0;	ENSMUSG00000021103.10	Mnat1	chr12	protein_coding	menage a trois 1
chr12	68866832	68866983	chr12_135045_IP1	3	-	152	3	68866836	intergenic;	--
chr12	81860807	81860981	chr12_132685_IP1	4	+	175	4	81860844	intron:1.0;	ENSMUSG00000021140.8	Pcnx	chr12	protein_coding	pecanex homolog (Drosophila)
chr12	19309560	19309741	chr12_131266_IP1	4	+	182	4	19309601	intergenic;	--
chr12	97796698	97796852	chr12_133079_IP1	3	+	155	3	97796706	intergenic;	--
chr12	99392824	99393020	chr12_133119_IP1	5	+	197	5	99392948	antisense;	ENSMUSG00000033713.9	Foxn3	chr12	protein_coding	forkhead box N3
chr12	4855045	4855198	chr12_130995_IP1	4	+	154	4	4855051	intron:1.0;	ENSMUSG00000051721.4	BC068281	chr12	protein_coding	cDNA sequence BC068281
chr12	36869227	36869384	chr12_131527_IP1	3	+	158	3	36869237	intergenic;	--
chr12	105032634	105032850	chr12_133242_IP1	8	+	217	8	105032750	five_prime_UTR:0.05;CDS:0.7;intron:0.25;	ENSMUSG00000021102.3	Glrx5	chr12	protein_coding	glutaredoxin 5 homolog (S. cerevisiae)
chr12	8936696	8936795	chr12_131096_IP1	5	+	100	5	8936697	CDS:1.0;	ENSMUSG00000020585.4	Laptm4a	chr12	protein_coding	lysosomal-associated protein transmembrane 4A
chr12	16894858	16894931	chr12_131198_IP1	4	+	74	4	16894866	intergenic;	--
chr12	31487316	31487385	chr12_134230_IP1	3	-	70	3	31487320	CDS:1.0;	ENSMUSG00000020659.13	Cbll1	chr12	protein_coding	Casitas B-lineage lymphoma-like 1
chr12	105706313	105706458	chr12_133256_IP1	3	+	146	3	105706316	intron:1.0;	ENSMUSG00000041323.5	Ak7	chr12	protein_coding	adenylate kinase 7
chr12	99848404	99848590	chr12_135801_IP1	3	-	187	3	99848443	intron:1.0;	ENSMUSG00000021176.5	Efcab11	chr12	protein_coding	EF-hand calcium binding domain 11
chr12	56345809	56345913	chr12_134754_IP1	3	-	105	3	56345812	five_prime_UTR:0.82;intron:0.18;	ENSMUSG00000021028.7	Mbip	chr12	protein_coding	MAP3K12 binding inhibitory protein 1
chr12	44979803	44979910	chr12_134486_IP1	3	-	108	3	44979806	intron:1.0;	ENSMUSG00000046314.13	Stxbp6	chr12	protein_coding	syntaxin binding protein 6 (amisyn)
chr12	5243208	5243354	chr12_131008_IP1	3	+	147	3	5243211	antisense;	ENSMUSG00000020627.9	Klhl29	chr12	protein_coding	kelch-like 29
chr12	34481114	34481331	chr12_131482_IP1	4	+	218	4	34481184	antisense;	ENSMUSG00000004698.9	Hdac9	chr12	protein_coding	histone deacetylase 9
chr12	97662901	97663108	chr12_133077_IP1	3	+	208	3	97662961	intergenic;	--
chr12	74154062	74154378	chr12_135169_IP1	4	-	317	3	74154136	antisense;	ENSMUSG00000044912.9	Syt16	chr12	protein_coding	synaptotagmin XVI
chr12	35047280	35047374	chr12_131489_IP1	4	+	95	4	35047284	five_prime_UTR:1.0;	ENSMUSG00000020590.13	Snx13	chr12	protein_coding	sorting nexin 13
chr12	74829872	74830029	chr12_135183_IP1	3	-	158	3	74829882	intergenic;	--
chr12	62616891	62617056	chr12_134876_IP1	4	-	166	4	62616923	intergenic;	--
chr12	43542338	43542557	chr12_131667_IP1	4	+	220	4	43542410	intergenic;	--
chr12	85040723	85040907	chr12_132807_IP1	4	+	185	4	85040760	CDS:1.0;	ENSMUSG00000021244.13	Ylpm1	chr12	protein_coding	YLP motif containing 1
chr12	72659360	72659484	chr12_135132_IP1	4	-	125	4	72659363	CDS:1.0;	ENSMUSG00000021094.9	Dhrs7	chr12	protein_coding	dehydrogenase/reductase (SDR family) member 7
chr12	101997078	101997224	chr12_135855_IP1	3	-	147	3	101997081	antisense;	ENSMUSG00000041781.8	Cpsf2	chr12	protein_coding	cleavage and polyadenylation specific factor 2
chr12	111436137	111436382	chr12_136126_IP1	4	-	246	4	111436237	intergenic;	--
chr12	104694329	104694439	chr12_135923_IP1	3	-	111	3	104694332	intron:1.0;	ENSMUSG00000041415.9	Dicer1	chr12	protein_coding	dicer 1, ribonuclease type III
chr12	69168928	69169039	chr12_132293_IP1	4	+	112	4	69169009	CDS:1.0;	ENSMUSG00000034883.8	Lrr1	chr12	protein_coding	leucine rich repeat protein 1
chr12	113144131	113144155	chr12_133744_IP1	6	+	25	6	113144144	CDS:1.0;	ENSMUSG00000006356.8	Crip2	chr12	protein_coding	cysteine rich protein 2
chr12	46648519	46648763	chr12_134521_IP1	4	-	245	4	46648618	intergenic;	--
chr12	3807792	3807981	chr12_130948_IP1	6	+	190	4	3807860	intron:1.0;	ENSMUSG00000020661.13	Dnmt3a	chr12	protein_coding	DNA methyltransferase 3A
chr12	67377999	67378142	chr12_132256_IP1	3	+	144	3	67378002	intergenic;	--
chr12	85119316	85119344	chr12_132813_IP1	4	+	29	4	85119337	CDS:1.0;	ENSMUSG00000004789.9	Dlst	chr12	protein_coding	dihydrolipoamide S-succinyltransferase (E2 component of 2-oxo-glutarate complex)
chr12	3806945	3807141	chr12_130945_IP1	5	+	197	5	3806994	five_prime_UTR:0.46;intron:0.54;	ENSMUSG00000020661.13	Dnmt3a	chr12	protein_coding	DNA methyltransferase 3A
chr12	31307971	31308046	chr12_131412_IP1	4	+	76	4	31308008	CDS:1.0;	ENSMUSG00000002900.13	Lamb1	chr12	protein_coding	laminin B1
chr12	28675314	28675439	chr12_131362_IP1	3	+	126	3	28675317	CDS:0.46;intron:0.54;	ENSMUSG00000020629.10	Adi1	chr12	protein_coding	acireductone dioxygenase 1
chr12	63012214	63012468	chr12_132150_IP1	3	+	255	3	63012321	intergenic;	--
chr12	101708277	101708420	chr12_135843_IP1	3	-	144	3	101708280	intron:1.0;	ENSMUSG00000021187.12	Tc2n	chr12	protein_coding	tandem C2 domains, nuclear
chr12	110695965	110696124	chr12_136070_IP1	3	-	160	3	110695982	intron:1.0;	ENSMUSG00000021270.11	Hsp90aa1	chr12	protein_coding	heat shock protein 90, alpha (cytosolic), class A member 1
chr12	112808990	112809051	chr12_133674_IP1	4	+	62	4	112808996	five_prime_UTR:1.0;	ENSMUSG00000037594.8	BC022687	chr12	protein_coding	cDNA sequence BC022687
chr12	113136517	113136808	chr12_133738_IP1	8	+	292	7	113136622	three_prime_UTR:0.48;CDS:0.52;	ENSMUSG00000021144.12	Mta1	chr12	protein_coding	metastasis associated 1
chr12	33249950	33250244	chr12_131450_IP1	4	+	295	3	33250191	three_prime_UTR:1.0;	ENSMUSG00000020564.14	Atxn7l1	chr12	protein_coding	ataxin 7-like 1
chr12	75595698	75595811	chr12_132473_IP1	4	+	114	4	75595703	antisense;	ENSMUSG00000021051.9	Ppp2r5e	chr12	protein_coding	protein phosphatase 2, regulatory subunit B', epsilon
chr12	84438507	84438717	chr12_132781_IP1	4	+	211	4	84438570	antisense;	ENSMUSG00000021238.10	Aldh6a1	chr12	protein_coding	aldehyde dehydrogenase family 6, subfamily A1
chr12	76578027	76578159	chr12_132541_IP1	4	+	133	4	76578047	CDS:1.0;	ENSMUSG00000052609.8	Plekhg3	chr12	protein_coding	pleckstrin homology domain containing, family G (with RhoGef domain) member 3
chr12	49391525	49391707	chr12_131823_IP1	4	+	183	4	49391645	three_prime_UTR:1.0;	ENSMUSG00000089922.2	3110039M20Rik	chr12	protein_coding	RIKEN cDNA 3110039M20 gene
chr12	48639525	48639660	chr12_134569_IP1	3	-	136	3	48639528	intergenic;	--
chr12	84171478	84171610	chr12_132770_IP1	4	+	133	4	84171530	antisense;	ENSMUSG00000042507.12	Elmsan1	chr12	protein_coding	ELM2 and Myb/SANT-like domain containing 1
chr12	47497764	47498047	chr12_131763_IP1	4	+	284	4	47497900	intergenic;	--
chr12	54862536	54862716	chr12_134709_IP1	4	-	181	4	54862592	intron:1.0;	ENSMUSG00000062929.7	Cfl2	chr12	protein_coding	cofilin 2, muscle
chr12	89708437	89708587	chr12_132916_IP1	3	+	151	3	89708440	intron:1.0;	ENSMUSG00000066392.9	Nrxn3	chr12	protein_coding	neurexin III
chr12	85290619	85290800	chr12_132823_IP1	4	+	182	4	85290655	CDS:1.0;	ENSMUSG00000045064.4	Zc2hc1c	chr12	protein_coding	zinc finger, C2HC-type containing 1C
chr12	4917856	4918126	chr12_131000_IP1	6	+	271	4	4917883	CDS:0.24;intron:0.76;	ENSMUSG00000052812.4	Atad2b	chr12	protein_coding	ATPase family, AAA domain containing 2B
chr12	4593074	4593232	chr12_133899_IP1	4	-	159	4	4593112	antisense;	ENSMUSG00000020640.9	Itsn2	chr12	protein_coding	intersectin 2
chr12	13534462	13534575	chr12_131152_IP1	3	+	114	3	13534466	CDS:1.0;	ENSMUSG00000020576.9	Nbas	chr12	protein_coding	neuroblastoma amplified sequence
chr12	80170221	80170336	chr12_135293_IP1	4	-	116	4	80170266	intron:1.0;	ENSMUSG00000015143.12	Actn1	chr12	protein_coding	actinin, alpha 1
chr12	49383660	49383958	chr12_134589_IP1	4	-	299	3	49383764	antisense;	ENSMUSG00000020950.10	Foxg1	chr12	protein_coding	forkhead box G1
chr12	25072071	25072288	chr12_131319_IP1	3	+	218	3	25072141	intergenic;	--
chr12	79393043	79393113	chr12_132616_IP1	4	+	71	4	79393057	intron:1.0;	ENSMUSG00000059060.11	Rad51b	chr12	protein_coding	RAD51 homolog B
chr12	17727855	17728018	chr12_131249_IP1	6	+	164	6	17727943	intron:1.0;	ENSMUSG00000071379.1	Hpcal1	chr12	protein_coding	hippocalcin-like 1
chr12	29984779	29985015	chr12_131382_IP1	4	+	237	4	29984868	CDS:0.5;intron:0.5;	ENSMUSG00000020674.14	Pxdn	chr12	protein_coding	peroxidasin homolog (Drosophila)
chr12	17546165	17546285	chr12_131239_IP1	9	+	121	9	17546184	intron:1.0;	ENSMUSG00000011179.7	Odc1	chr12	protein_coding	ornithine decarboxylase, structural 1
chr12	13453335	13453576	chr12_131150_IP1	5	+	242	3	13453337	CDS:0.38;intron:0.62;	ENSMUSG00000020576.9	Nbas	chr12	protein_coding	neuroblastoma amplified sequence
chr12	56488136	56488325	chr12_131974_IP1	3	+	190	3	56488178	intergenic;	--
chr12	62673781	62674027	chr12_134879_IP1	3	-	247	3	62673881	intergenic;	--
chr12	8935986	8936082	chr12_131095_IP1	6	+	97	5	8936002	CDS:1.0;	ENSMUSG00000020585.4	Laptm4a	chr12	protein_coding	lysosomal-associated protein transmembrane 4A
chr12	64966225	64966372	chr12_132201_IP1	6	+	148	6	64966234	CDS:1.0;	ENSMUSG00000035614.10	Fam179b	chr12	protein_coding	family with sequence similarity 179, member B
chr12	99273203	99273425	chr12_135776_IP1	3	-	223	3	99273278	intron:1.0;	ENSMUSG00000033713.9	Foxn3	chr12	protein_coding	forkhead box N3
chr12	63226503	63226710	chr12_132155_IP1	3	+	208	3	63226563	intergenic;	--
chr12	43588645	43588756	chr12_134468_IP1	3	-	112	3	43588648	intergenic;	--
chr11	70724821	70724994	chr11_20760_IP1	6	+	174	6	70724858	CDS:1.0;	ENSMUSG00000020821.15	Kif1c	chr11	protein_coding	kinesin family member 1C
chr11	3907642	3907774	chr11_23350_IP1	10	-	133	10	3907705	CDS:1.0;	ENSMUSG00000048807.2	Slc35e4	chr11	protein_coding	solute carrier family 35, member E4
chr11	118003708	118003842	chr11_22914_IP1	4	+	135	4	118003713	intron:1.0;	ENSMUSG00000017715.9	Pgs1	chr11	protein_coding	phosphatidylglycerophosphate synthase 1
chr11	49712325	49712447	chr11_19839_IP1	4	+	123	4	49712358	antisense;	ENSMUSG00000020362.11	Cnot6	chr11	protein_coding	CCR4-NOT transcription complex, subunit 6
chr11	61487078	61487162	chr11_20358_IP1	4	+	85	4	61487078	CDS:1.0;	ENSMUSG00000042436.10	Mfap4	chr11	protein_coding	microfibrillar-associated protein 4
chr11	5064387	5064478	chr11_23403_IP1	6	-	92	6	5064404	five_prime_UTR:0.22;CDS:0.78;	ENSMUSG00000034201.11	Gas2l1	chr11	protein_coding	growth arrest-specific 2 like 1
chr11	51687530	51687680	chr11_19943_IP1	3	+	151	3	51687533	antisense;	ENSMUSG00000007777.7	0610009B22Rik	chr11	protein_coding	RIKEN cDNA 0610009B22 gene
chr11	60105084	60105189	chr11_24909_IP1	4	-	106	4	60105109	antisense;	ENSMUSG00000062115.13	Rai1	chr11	protein_coding	retinoic acid induced 1
chr11	116471288	116471409	chr11_27473_IP1	4	-	122	4	116471304	three_prime_UTR:0.89;CDS:0.11;	ENSMUSG00000015869.14	Prpsap1	chr11	protein_coding	phosphoribosyl pyrophosphate synthetase-associated protein 1
chr11	68990656	68990798	chr11_25221_IP1	5	-	143	5	68990708	CDS:0.89;intron:0.11;	ENSMUSG00000020899.13	Pfas	chr11	protein_coding	phosphoribosylformylglycinamidine synthase (FGAR amidotransferase)
chr11	115708052	115708209	chr11_27364_IP1	7	-	158	7	115708075	intron:1.0;	ENSMUSG00000059923.11	Grb2	chr11	protein_coding	growth factor receptor bound protein 2
chr11	60537883	60537962	chr11_20308_IP1	6	+	80	6	60537898	intergenic;	--
chr11	68212183	68212374	chr11_25179_IP1	7	-	192	7	68212287	three_prime_UTR:1.0;	ENSMUSG00000020902.10	Ntn1	chr11	protein_coding	netrin 1
chr11	50135824	50135900	chr11_19852_IP1	4	+	77	4	50135824	CDS:1.0;	ENSMUSG00000036644.13	Tbc1d9b	chr11	protein_coding	TBC1 domain family, member 9B
chr11	76101986	76102064	chr11_25627_IP1	3	-	79	3	76101986	CDS:1.0;	ENSMUSG00000017288.13	Vps53	chr11	protein_coding	vacuolar protein sorting 53 (yeast)
chr11	4874028	4874156	chr11_18789_IP1	4	+	129	4	4874074	CDS:0.59;intron:0.41;	ENSMUSG00000034285.13	Nipsnap1	chr11	protein_coding	4-nitrophenylphosphatase domain and non-neuronal SNAP25-like protein homolog 1 (C. elegans)
chr11	77859296	77859483	chr11_21131_IP1	10	+	188	8	77859389	intron:1.0;	ENSMUSG00000000631.17	Myo18a	chr11	protein_coding	myosin XVIIIA
chr11	116283469	116283657	chr11_27454_IP1	4	-	189	4	116283510	antisense;	ENSMUSG00000020793.5	Galr2	chr11	protein_coding	galanin receptor 2
chr11	77493300	77493619	chr11_25701_IP1	18	-	320	12	77493409	antisense;	ENSMUSG00000011877.11	Git1	chr11	protein_coding	G protein-coupled receptor kinase-interactor 1
chr11	102018618	102018771	chr11_26788_IP1	3	-	154	3	102018629	CDS:0.56;intron:0.44;	ENSMUSG00000052373.12	Mpp3	chr11	protein_coding	membrane protein, palmitoylated 3 (MAGUK p55 subfamily member 3)
chr11	66579423	66579554	chr11_20471_IP1	3	+	132	3	66579426	intergenic;	--
chr11	16936468	16936564	chr11_23762_IP1	4	-	97	4	16936521	noncoding_exon:1.0;	ENSMUSG00000087060.5	Eldr	chr11	processed_transcript	Egfr long non-coding downstream RNA
chr11	5740806	5741001	chr11_23468_IP1	4	-	196	4	5740854	intron:1.0;	ENSMUSG00000049680.15	Urgcp	chr11	protein_coding	upregulator of cell proliferation
chr11	69405104	69405223	chr11_20583_IP1	4	+	120	4	69405144	antisense;	ENSMUSG00000018476.7	Kdm6b	chr11	protein_coding	KDM1 lysine (K)-specific demethylase 6B
chr11	77801177	77801289	chr11_21100_IP1	4	+	113	4	77801188	intron:1.0;	ENSMUSG00000000631.17	Myo18a	chr11	protein_coding	myosin XVIIIA
chr11	8578104	8578218	chr11_18958_IP1	3	+	115	3	8578107	antisense;	ENSMUSG00000020422.11	Tns3	chr11	protein_coding	tensin 3
chr11	20025639	20025804	chr11_23820_IP1	3	-	166	3	20025657	intergenic;	--
chr11	61493738	61493887	chr11_25024_IP1	4	-	150	4	61493750	five_prime_UTR:0.06;CDS:0.94;	ENSMUSG00000001034.15	Mapk7	chr11	protein_coding	mitogen-activated protein kinase 7
chr11	120812657	120812861	chr11_27880_IP1	11	-	205	7	120812657	CDS:1.0;	ENSMUSG00000025153.8	Fasn	chr11	protein_coding	fatty acid synthase
chr11	67107169	67107396	chr11_20476_IP1	3	+	228	3	67107249	intergenic;	--
chr11	5105817	5105995	chr11_18818_IP1	4	+	179	4	5105853	three_prime_UTR:0.1;CDS:0.9;	ENSMUSG00000034175.11	Rhbdd3	chr11	protein_coding	rhomboid domain containing 3
chr11	62457147	62457275	chr11_20403_IP1	4	+	129	4	62457149	antisense;	ENSMUSG00000018501.15	Ncor1	chr11	protein_coding	nuclear receptor co-repressor 1
chr11	95025121	95025401	chr11_21758_IP1	7	+	281	7	95025254	three_prime_UTR:1.0;	ENSMUSG00000047181.10	Samd14	chr11	protein_coding	sterile alpha motif domain containing 14
chr11	119039269	119039449	chr11_27651_IP1	4	-	181	4	119039302	CDS:1.0;	ENSMUSG00000025578.9	Cbx8	chr11	protein_coding	chromobox 8
chr11	70606147	70606387	chr11_20713_IP1	14	+	241	12	70606201	CDS:0.07;intron:0.93;	ENSMUSG00000020827.16	Mink1	chr11	protein_coding	misshapen-like kinase 1 (zebrafish)
chr11	77470989	77471080	chr11_25689_IP1	4	-	92	4	77471049	three_prime_UTR:1.0;	ENSMUSG00000037907.14	Ankrd13b	chr11	protein_coding	ankyrin repeat domain 13b
chr11	100461336	100461483	chr11_22115_IP1	3	+	148	3	100461342	intergenic;	--
chr11	115514135	115514208	chr11_27337_IP1	4	-	74	4	115514168	intron:1.0;	ENSMUSG00000020737.10	Hn1	chr11	protein_coding	hematological and neurological expressed sequence 1
chr11	83335546	83335602	chr11_21369_IP1	4	+	57	4	83335564	CDS:1.0;	ENSMUSG00000035152.12	Ap2b1	chr11	protein_coding	adaptor-related protein complex 2, beta 1 subunit
chr11	73121563	73121722	chr11_25496_IP1	3	-	160	3	73121575	antisense;	ENSMUSG00000005947.9	Itgae	chr11	protein_coding	integrin alpha E, epithelial-associated
chr11	29062113	29062275	chr11_24028_IP1	3	-	163	3	29062129	intergenic;	--
chr11	109362556	109362912	chr11_27209_IP1	8	-	357	6	109362630	intron:1.0;	ENSMUSG00000056687.7	Gm11696	chr11	antisense	predicted gene 11696
chr11	74773521	74773576	chr11_20893_IP1	4	+	56	4	74773521	CDS:1.0;	ENSMUSG00000010554.12	Mettl16	chr11	protein_coding	methyltransferase like 16
chr11	69980841	69981585	chr11_20645_IP1	57	+	745	26	69981434	five_prime_UTR:0.44;CDS:0.14;intron:0.42;	ENSMUSG00000018559.14	Ctdnep1	chr11	protein_coding	CTD nuclear envelope phosphatase 1
chr11	78536521	78536758	chr11_21230_IP1	4	+	238	4	78536611	five_prime_UTR:0.23;intron:0.77;	ENSMUSG00000001105.13	Ift20	chr11	protein_coding	intraflagellar transport 20
chr11	30474540	30474753	chr11_19427_IP1	3	+	214	3	30474615	intergenic;	--
chr11	23633202	23633462	chr11_23942_IP1	6	-	261	5	23633401	intron:1.0;	ENSMUSG00000042208.13	0610010F05Rik	chr11	protein_coding	RIKEN cDNA 0610010F05 gene
chr11	70651137	70651221	chr11_20729_IP1	4	+	85	4	70651157	three_prime_UTR:0.08;CDS:0.92;	ENSMUSG00000040746.13	Rnf167	chr11	protein_coding	ring finger protein 167
chr11	102295878	102296027	chr11_26840_IP1	7	-	150	7	102295914	intron:1.0;	ENSMUSG00000059995.10	Atxn7l3	chr11	protein_coding	ataxin 7-like 3
chr11	50230679	50230865	chr11_19870_IP1	10	+	187	8	50230744	CDS:1.0;	ENSMUSG00000036620.12	Mgat4b	chr11	protein_coding	mannoside acetylglucosaminyltransferase 4, isoenzyme B
chr11	117809802	117810223	chr11_22887_IP1	16	+	422	9	117810131	CDS:0.0;intron:1.0;	ENSMUSG00000048277.13	Syngr2	chr11	protein_coding	synaptogyrin 2
chr11	59212095	59212653	chr11_24857_IP1	12	-	559	7	59212371	three_prime_UTR:0.78;CDS:0.22;	ENSMUSG00000048076.12	Arf1	chr11	protein_coding	ADP-ribosylation factor 1
chr11	93886280	93886427	chr11_21627_IP1	4	+	148	4	93886296	five_prime_UTR:0.93;intron:0.07;	ENSMUSG00000059474.11	Mbtd1	chr11	protein_coding	mbt domain containing 1
chr11	69778423	69778591	chr11_20621_IP1	5	+	169	5	69778490	three_prime_UTR:1.0;	ENSMUSG00000018750.12	Zbtb4	chr11	protein_coding	zinc finger and BTB domain containing 4
chr11	83495438	83495555	chr11_21378_IP1	3	+	118	3	83495441	intron:1.0;	ENSMUSG00000020680.13	Taf15	chr11	protein_coding	TAF15 RNA polymerase II, TATA box binding protein (TBP)-associated factor
chr11	20995805	20995940	chr11_19202_IP1	3	+	136	3	20995808	intergenic;	--
chr11	30159293	30159445	chr11_24100_IP1	5	-	153	4	30159345	CDS:1.0;	ENSMUSG00000020315.16	Sptbn1	chr11	protein_coding	spectrin beta, non-erythrocytic 1
chr11	74896718	74896841	chr11_20910_IP1	4	+	124	4	74896782	antisense;	ENSMUSG00000038351.12	Sgsm2	chr11	protein_coding	small G protein signaling modulator 2
chr11	37683217	37683405	chr11_24284_IP1	3	-	189	3	37683258	intergenic;	--
chr11	60105708	60105930	chr11_20255_IP1	12	+	223	12	60105783	intron:1.0;	ENSMUSG00000062115.13	Rai1	chr11	protein_coding	retinoic acid induced 1
chr11	69695685	69695836	chr11_20610_IP1	5	+	152	5	69695742	antisense;	ENSMUSG00000018752.17	Tnfsfm13	chr11	protein_coding	tumor necrosis factor (ligand) superfamily, membrane-bound member 13
chr11	6007095	6007284	chr11_18869_IP1	3	+	190	3	6007157	antisense;	ENSMUSG00000057897.12	Camk2b	chr11	protein_coding	calcium/calmodulin-dependent protein kinase II, beta
chr11	107131943	107132086	chr11_27165_IP1	10	-	144	10	107131997	five_prime_UTR:1.0;	ENSMUSG00000040481.14	Bptf	chr11	protein_coding	bromodomain PHD finger transcription factor
chr11	91745495	91745635	chr11_21587_IP1	3	+	141	3	91745498	intergenic;	--
chr11	17980204	17980420	chr11_23787_IP1	3	-	217	3	17980273	intergenic;	--
chr11	77458309	77458516	chr11_21054_IP1	3	+	208	3	77458370	three_prime_UTR:1.0;	ENSMUSG00000037926.13	Ssh2	chr11	protein_coding	slingshot homolog 2 (Drosophila)
chr11	5070625	5070723	chr11_23410_IP1	8	-	99	8	5070625	CDS:1.0;	ENSMUSG00000009079.14	Ewsr1	chr11	protein_coding	Ewing sarcoma breakpoint region 1
chr11	88845423	88845695	chr11_26123_IP1	6	-	273	4	88845513	CDS:1.0;	ENSMUSG00000018428.13	Akap1	chr11	protein_coding	A kinase (PRKA) anchor protein 1
chr11	20648013	20648182	chr11_19187_IP1	10	+	170	8	20648078	CDS:1.0;	ENSMUSG00000049800.11	Sertad2	chr11	protein_coding	SERTA domain containing 2
chr11	94950290	94950398	chr11_21725_IP1	13	+	109	13	94950290	CDS:1.0;	ENSMUSG00000001506.10	Col1a1	chr11	protein_coding	collagen, type I, alpha 1
chr11	65411183	65411365	chr11_20462_IP1	3	+	183	3	65411219	intergenic;	--
chr11	73137640	73137731	chr11_25497_IP1	4	-	92	4	73137647	CDS:1.0;	ENSMUSG00000050107.2	Gsg2	chr11	protein_coding	germ cell-specific gene 2
chr11	94991039	94991310	chr11_21735_IP1	32	+	272	27	94991151	five_prime_UTR:1.0;	ENSMUSG00000038976.10	Ppp1r9b	chr11	protein_coding	protein phosphatase 1, regulatory subunit 9B
chr11	120549656	120549704	chr11_27784_IP1	4	-	49	4	120549656	five_prime_UTR:1.0;	ENSMUSG00000061111.8	Fam195b	chr11	protein_coding	family with sequence similarity 195, member B
chr11	74297573	74297761	chr11_25522_IP1	3	-	189	3	74297614	intergenic;	--
chr11	8446103	8446222	chr11_23568_IP1	4	-	120	4	8446107	intron:1.0;	ENSMUSG00000020422.11	Tns3	chr11	protein_coding	tensin 3
chr11	5707623	5707672	chr11_23462_IP1	6	-	50	5	5707623	five_prime_UTR:0.2;CDS:0.8;	ENSMUSG00000020477.8	Mrps24	chr11	protein_coding	mitochondrial ribosomal protein S24
chr11	117749623	117749766	chr11_22877_IP1	8	+	144	7	117749721	CDS:1.0;	ENSMUSG00000025571.11	Tnrc6c	chr11	protein_coding	trinucleotide repeat containing 6C
chr11	69416016	69416186	chr11_25290_IP1	5	-	171	5	69416107	intergenic;	--
chr11	102478141	102478326	chr11_26899_IP1	6	-	186	6	102478256	three_prime_UTR:0.28;CDS:0.72;	ENSMUSG00000034621.12	Gpatch8	chr11	protein_coding	G patch domain containing 8
chr11	74649744	74649950	chr11_20879_IP1	4	+	207	4	74649841	intron:1.0;	ENSMUSG00000020741.15	Cluh	chr11	protein_coding	clustered mitochondria (cluA/CLU1) homolog
chr11	5261336	5261640	chr11_23443_IP1	8	-	305	7	5261482	five_prime_UTR:0.11;CDS:0.3;intron:0.59;	ENSMUSG00000020393.14	Kremen1	chr11	protein_coding	kringle containing transmembrane protein 1
chr11	70044660	70044794	chr11_20684_IP1	4	+	135	4	70044678	three_prime_UTR:0.74;CDS:0.26;	ENSMUSG00000020886.14	Dlg4	chr11	protein_coding	discs, large homolog 4 (Drosophila)
chr11	98202953	98203391	chr11_21946_IP1	12	+	439	5	98203222	five_prime_UTR:0.12;CDS:0.05;intron:0.82;	ENSMUSG00000003119.12	Cdk12	chr11	protein_coding	cyclin-dependent kinase 12
chr11	76024996	76025057	chr11_25621_IP1	4	-	62	4	76025052	CDS:1.0;	ENSMUSG00000020846.6	Fam101b	chr11	protein_coding	family with sequence similarity 101, member B
chr11	101276329	101276396	chr11_26757_IP1	3	-	68	3	101276332	antisense;	ENSMUSG00000035112.15	Wnk4	chr11	protein_coding	WNK lysine deficient protein kinase 4
chr11	69981375	69981548	chr11_25384_IP1	4	-	174	4	69981420	antisense;	ENSMUSG00000018559.14	Ctdnep1	chr11	protein_coding	CTD nuclear envelope phosphatase 1
chr11	74859745	74859804	chr11_25562_IP1	4	-	60	4	74859745	CDS:1.0;	ENSMUSG00000038351.12	Sgsm2	chr11	protein_coding	small G protein signaling modulator 2
chr11	120721350	120721458	chr11_27848_IP1	4	-	109	4	120721407	intergenic;	--
chr11	109659881	109660095	chr11_22542_IP1	7	+	215	6	109660011	CDS:0.45;intron:0.55;	ENSMUSG00000020612.14	Prkar1a	chr11	protein_coding	protein kinase, cAMP dependent regulatory, type I, alpha
chr11	109918669	109918896	chr11_22554_IP1	3	+	228	3	109918749	intergenic;	--
chr11	105331890	105332047	chr11_22370_IP1	6	+	158	6	105331962	CDS:1.0;	ENSMUSG00000020695.12	Mrc2	chr11	protein_coding	mannose receptor, C type 2
chr11	100320257	100320449	chr11_26616_IP1	8	-	193	8	100320306	antisense;	ENSMUSG00000035530.11	Eif1	chr11	protein_coding	eukaryotic translation initiation factor 1
chr11	61486909	61487006	chr11_20357_IP1	4	+	98	4	61486943	CDS:1.0;	ENSMUSG00000042436.10	Mfap4	chr11	protein_coding	microfibrillar-associated protein 4
chr11	116533872	116534042	chr11_22778_IP1	5	+	171	5	116533970	five_prime_UTR:1.0;	ENSMUSG00000061878.13	Sphk1	chr11	protein_coding	sphingosine kinase 1
chr11	75679334	75679432	chr11_25610_IP1	6	-	99	6	75679380	antisense;	ENSMUSG00000017776.13	Crk	chr11	protein_coding	v-crk sarcoma virus CT10 oncogene homolog (avian)
chr11	120993109	120993236	chr11_23233_IP1	3	+	128	3	120993112	intergenic;	--
chr11	60722294	60722398	chr11_24985_IP1	5	-	105	5	60722294	CDS:1.0;	ENSMUSG00000002812.4	Flii	chr11	protein_coding	flightless I homolog (Drosophila)
chr11	76092291	76092315	chr11_25626_IP1	3	-	25	3	76092294	CDS:1.0;	ENSMUSG00000017288.13	Vps53	chr11	protein_coding	vacuolar protein sorting 53 (yeast)
chr11	50792760	50792853	chr11_19919_IP1	4	+	94	4	50792764	CDS:1.0;	ENSMUSG00000036545.8	Adamts2	chr11	protein_coding	a disintegrin-like and metallopeptidase (reprolysin type) with thrombospondin type 1 motif, 2
chr11	3132886	3132965	chr11_23276_IP1	4	-	80	4	3132907	CDS:1.0;	ENSMUSG00000023764.16	Sfi1	chr11	protein_coding	Sfi1 homolog, spindle assembly associated (yeast)
chr11	77493811	77494025	chr11_21060_IP1	10	+	215	10	77493947	intron:1.0;	ENSMUSG00000011877.11	Git1	chr11	protein_coding	G protein-coupled receptor kinase-interactor 1
chr11	73137986	73138107	chr11_25498_IP1	6	-	122	6	73138025	CDS:1.0;	ENSMUSG00000050107.2	Gsg2	chr11	protein_coding	germ cell-specific gene 2
chr11	96064973	96065105	chr11_21808_IP1	4	+	133	4	96064994	antisense;	ENSMUSG00000014349.7	Ube2z	chr11	protein_coding	ubiquitin-conjugating enzyme E2Z (putative)
chr11	101465707	101465767	chr11_22194_IP1	4	+	61	4	101465729	antisense;	ENSMUSG00000034993.7	Vat1	chr11	protein_coding	vesicle amine transport protein 1 homolog (T californica)
chr11	98960574	98960744	chr11_22067_IP1	6	+	171	6	98960695	intron:1.0;	ENSMUSG00000037992.14	Rara	chr11	protein_coding	retinoic acid receptor, alpha
chr11	96789214	96789353	chr11_26405_IP1	4	-	140	4	96789293	antisense;	ENSMUSG00000018666.11	Cbx1	chr11	protein_coding	chromobox 1
chr11	75340289	75340391	chr11_25587_IP1	4	-	103	4	75340329	CDS:1.0;	ENSMUSG00000000751.11	Rpa1	chr11	protein_coding	replication protein A1
chr11	37215571	37215711	chr11_24276_IP1	3	-	141	3	37215574	intron:1.0;	ENSMUSG00000049336.14	Tenm2	chr11	protein_coding	teneurin transmembrane protein 2
chr11	60721788	60721857	chr11_24984_IP1	5	-	70	5	60721851	CDS:1.0;	ENSMUSG00000002812.4	Flii	chr11	protein_coding	flightless I homolog (Drosophila)
chr11	31871360	31871477	chr11_19473_IP1	6	+	118	6	31871381	intergenic;	--
chr11	42004875	42005096	chr11_24391_IP1	3	-	222	3	42004952	intergenic;	--
chr11	69030562	69030635	chr11_20546_IP1	6	+	74	6	69030573	CDS:0.49;intron:0.51;	ENSMUSG00000020898.16	Ctc1	chr11	protein_coding	CTS telomere maintenance complex component 1
chr11	78262057	78262209	chr11_21194_IP1	4	+	153	4	78262110	intron:1.0;	ENSMUSG00000010277.7	2610507B11Rik	chr11	protein_coding	RIKEN cDNA 2610507B11 gene
chr11	119283173	119283278	chr11_22985_IP1	6	+	106	6	119283173	CDS:1.0;	ENSMUSG00000025579.12	Gaa	chr11	protein_coding	glucosidase, alpha, acid
chr11	102924982	102925072	chr11_26939_IP1	4	-	91	4	102925004	five_prime_UTR:1.0;	ENSMUSG00000051378.10	Kif18b	chr11	protein_coding	kinesin family member 18B
chr11	97280387	97280593	chr11_21845_IP1	6	+	207	6	97280466	intron:1.0;	ENSMUSG00000086680.2	Gm11592	chr11	antisense	predicted gene 11592
chr11	96827490	96827995	chr11_26424_IP1	18	-	506	11	96827567	five_prime_UTR:0.57;CDS:0.43;	ENSMUSG00000038615.15	Nfe2l1	chr11	protein_coding	nuclear factor, erythroid derived 2,-like 1
chr11	62329986	62330108	chr11_25057_IP1	4	-	123	4	62330016	CDS:1.0;	ENSMUSG00000018501.15	Ncor1	chr11	protein_coding	nuclear receptor co-repressor 1
chr11	120000984	120001293	chr11_23106_IP1	7	+	310	4	120001021	intron:1.0;	ENSMUSG00000025372.14	Baiap2	chr11	protein_coding	brain-specific angiogenesis inhibitor 1-associated protein 2
chr11	115281880	115281973	chr11_22661_IP1	4	+	94	4	115281897	antisense;	ENSMUSG00000044788.10	Fads6	chr11	protein_coding	fatty acid desaturase domain family, member 6
chr11	73176511	73176751	chr11_25501_IP1	16	-	241	8	73176592	five_prime_UTR:0.2;CDS:0.8;	ENSMUSG00000047260.4	Emc6	chr11	protein_coding	ER membrane protein complex subunit 6
chr11	69030690	69030799	chr11_20547_IP1	4	+	110	4	69030690	CDS:1.0;	ENSMUSG00000020898.16	Ctc1	chr11	protein_coding	CTS telomere maintenance complex component 1
chr11	55204390	55204488	chr11_20097_IP1	4	+	99	4	55204429	five_prime_UTR:1.0;	ENSMUSG00000020261.13	Slc36a1	chr11	protein_coding	solute carrier family 36 (proton/amino acid symporter), member 1
chr11	106201962	106202157	chr11_27088_IP1	4	-	196	4	106202010	CDS:0.75;intron:0.25;	ENSMUSG00000078622.6	Ccdc47	chr11	protein_coding	coiled-coil domain containing 47
chr11	102432964	102433004	chr11_26876_IP1	4	-	41	4	102432964	antisense;	ENSMUSG00000034708.9	Grn	chr11	protein_coding	granulin
chr11	100905483	100905595	chr11_26721_IP1	4	-	113	4	100905491	CDS:0.03;intron:0.97;	ENSMUSG00000004040.14	Stat3	chr11	protein_coding	signal transducer and activator of transcription 3
chr11	120236025	120236118	chr11_23125_IP1	4	+	94	4	120236045	intron:1.0;	ENSMUSG00000039741.13	Bahcc1	chr11	protein_coding	BAH domain and coiled-coil containing 1
chr11	3266147	3266380	chr11_23297_IP1	6	-	234	4	3266190	five_prime_UTR:0.3;CDS:0.18;intron:0.52;	ENSMUSG00000020457.11	Drg1	chr11	protein_coding	developmentally regulated GTP binding protein 1
chr11	106612738	106612953	chr11_27125_IP1	6	-	216	4	106612792	five_prime_UTR:0.34;intron:0.66;	ENSMUSG00000040548.13	Tex2	chr11	protein_coding	testis expressed gene 2
chr11	4151053	4151273	chr11_23362_IP1	4	-	221	4	4151150	intron:1.0;	ENSMUSG00000051427.12	Ccdc157	chr11	protein_coding	coiled-coil domain containing 157
chr11	6617598	6617693	chr11_23541_IP1	4	-	96	4	6617641	CDS:0.33;intron:0.67;	ENSMUSG00000000384.13	Tbrg4	chr11	protein_coding	transforming growth factor beta regulated gene 4
chr11	69776253	69776353	chr11_20618_IP1	4	+	101	4	69776270	CDS:1.0;	ENSMUSG00000018750.12	Zbtb4	chr11	protein_coding	zinc finger and BTB domain containing 4
chr11	97395770	97395921	chr11_21854_IP1	3	+	152	3	97395774	three_prime_UTR:1.0;	ENSMUSG00000038485.5	Socs7	chr11	protein_coding	suppressor of cytokine signaling 7
chr11	100738106	100738160	chr11_22121_IP1	4	+	55	4	100738111	antisense;	ENSMUSG00000019173.9	Rab5c	chr11	protein_coding	RAB5C, member RAS oncogene family
chr11	3371014	3371206	chr11_23303_IP1	4	-	193	4	3371107	intron:1.0;	ENSMUSG00000020451.15	Limk2	chr11	protein_coding	LIM motif-containing protein kinase 2
chr11	13727109	13727375	chr11_23688_IP1	4	-	267	4	13727228	intergenic;	--
chr11	94598156	94598280	chr11_26284_IP1	4	-	125	4	94598168	intron:1.0;	ENSMUSG00000076435.3	Acsf2	chr11	protein_coding	acyl-CoA synthetase family member 2
chr11	55001101	55001188	chr11_24748_IP1	4	-	88	4	55001111	intron:1.0;	ENSMUSG00000018340.11	Anxa6	chr11	protein_coding	annexin A6
chr11	96977111	96977283	chr11_26443_IP1	4	-	173	4	96977181	intron:1.0;	ENSMUSG00000018678.10	Sp2	chr11	protein_coding	Sp2 transcription factor
chr11	69765950	69766085	chr11_20616_IP1	7	+	136	5	69765966	five_prime_UTR:1.0;	ENSMUSG00000018750.12	Zbtb4	chr11	protein_coding	zinc finger and BTB domain containing 4
chr11	113523555	113523624	chr11_27276_IP1	4	-	70	4	113523582	CDS:1.0;	ENSMUSG00000041654.13	Slc39a11	chr11	protein_coding	solute carrier family 39 (metal ion transporter), member 11
chr11	94936276	94936444	chr11_21673_IP1	23	+	169	17	94936321	five_prime_UTR:0.55;CDS:0.45;	ENSMUSG00000001506.10	Col1a1	chr11	protein_coding	collagen, type I, alpha 1
chr11	103953880	103954000	chr11_27003_IP1	4	-	121	4	103953883	five_prime_UTR:0.16;CDS:0.1;intron:0.74;	ENSMUSG00000034187.16	Nsf	chr11	protein_coding	N-ethylmaleimide sensitive fusion protein
chr11	59307299	59307323	chr11_24864_IP1	3	-	25	3	59307303	antisense;	ENSMUSG00000000126.9	Wnt9a	chr11	protein_coding	wingless-type MMTV integration site family, member 9A
chr11	83302783	83302837	chr11_21364_IP1	3	+	55	3	83302794	five_prime_UTR:1.0;	ENSMUSG00000035152.12	Ap2b1	chr11	protein_coding	adaptor-related protein complex 2, beta 1 subunit
chr11	117360955	117361030	chr11_22860_IP1	4	+	76	4	117360964	three_prime_UTR:1.0;	ENSMUSG00000059248.11	2020-09-09	chr11	protein_coding	septin 9
chr11	55469743	55470004	chr11_20104_IP1	16	+	262	12	55469857	five_prime_UTR:0.22;intron:0.78;	ENSMUSG00000018583.5	G3bp1	chr11	protein_coding	GTPase activating protein (SH3 domain) binding protein 1
chr11	93996085	93996513	chr11_21633_IP1	29	+	429	21	93996205	five_prime_UTR:0.39;CDS:0.57;intron:0.04;	ENSMUSG00000020859.14	Spag9	chr11	protein_coding	sperm associated antigen 9
chr11	74770867	74770984	chr11_20892_IP1	4	+	118	4	74770924	five_prime_UTR:1.0;	ENSMUSG00000010554.12	Mettl16	chr11	protein_coding	methyltransferase like 16
chr11	76494760	76494881	chr11_21026_IP1	4	+	122	4	76494787	antisense;	ENSMUSG00000017631.16	Abr	chr11	protein_coding	active BCR-related gene
chr11	44934068	44934220	chr11_19752_IP1	3	+	153	3	44934073	intron:1.0;	ENSMUSG00000057098.12	Ebf1	chr11	protein_coding	early B cell factor 1
chr11	110308285	110308436	chr11_27234_IP1	3	-	152	3	110308289	intron:1.0;	ENSMUSG00000018800.12	Abca5	chr11	protein_coding	ATP-binding cassette, sub-family A (ABC1), member 5
chr11	45379629	45379911	chr11_19754_IP1	3	+	283	3	45379764	intergenic;	--
chr11	78154184	78154282	chr11_21167_IP1	4	+	99	4	78154196	CDS:1.0;	ENSMUSG00000037750.14	Fam222b	chr11	protein_coding	family with sequence similarity 222, member B
chr11	59839215	59839480	chr11_20247_IP1	3	+	266	3	59839336	antisense;	ENSMUSG00000019373.9	Cops3	chr11	protein_coding	COP9 (constitutive photomorphogenic) homolog, subunit 3 (Arabidopsis thaliana)
chr11	77686603	77686814	chr11_21083_IP1	4	+	212	4	77686720	intron:1.0;	ENSMUSG00000037857.14	Nufip2	chr11	protein_coding	nuclear fragile X mental retardation protein interacting protein 2
chr11	117997440	117997508	chr11_22913_IP1	4	+	69	4	117997440	CDS:1.0;	ENSMUSG00000017715.9	Pgs1	chr11	protein_coding	phosphatidylglycerophosphate synthase 1
chr11	50266964	50267010	chr11_24549_IP1	6	-	47	6	50267009	CDS:1.0;	ENSMUSG00000050567.14	Maml1	chr11	protein_coding	mastermind like 1 (Drosophila)
chr11	102447397	102447567	chr11_26896_IP1	9	-	171	9	102447460	five_prime_UTR:0.31;CDS:0.69;	ENSMUSG00000034685.4	Fam171a2	chr11	protein_coding	family with sequence similarity 171, member A2
chr11	68384966	68385168	chr11_25186_IP1	6	-	203	6	68385058	CDS:0.33;intron:0.67;	ENSMUSG00000020902.10	Ntn1	chr11	protein_coding	netrin 1
chr11	68990308	68990575	chr11_25220_IP1	6	-	268	4	68990367	CDS:0.78;intron:0.22;	ENSMUSG00000020899.13	Pfas	chr11	protein_coding	phosphoribosylformylglycinamidine synthase (FGAR amidotransferase)
chr11	5062197	5062302	chr11_23400_IP1	6	-	106	6	5062215	CDS:1.0;	ENSMUSG00000034201.11	Gas2l1	chr11	protein_coding	growth arrest-specific 2 like 1
chr11	3912741	3913110	chr11_23352_IP1	18	-	370	10	3912813	CDS:1.0;	ENSMUSG00000048807.2	Slc35e4	chr11	protein_coding	solute carrier family 35, member E4
chr11	98718005	98718126	chr11_21999_IP1	3	+	122	3	98718009	antisense;	ENSMUSG00000017210.12	Med24	chr11	protein_coding	mediator complex subunit 24
chr11	120469008	120469092	chr11_23160_IP1	5	+	85	5	120469008	CDS:1.0;	ENSMUSG00000025793.13	Hgs	chr11	protein_coding	HGF-regulated tyrosine kinase substrate
chr11	20205426	20205538	chr11_19177_IP1	6	+	113	6	20205470	intron:1.0;	ENSMUSG00000020149.15	Rab1	chr11	protein_coding	RAB1, member RAS oncogene family
chr11	73919696	73919913	chr11_20865_IP1	3	+	218	3	73919766	intergenic;	--
chr11	107796413	107796436	chr11_27178_IP1	3	-	24	3	107796417	intergenic;	--
chr11	94474137	94474362	chr11_26265_IP1	5	-	226	5	94474216	five_prime_UTR:0.27;intron:0.73;	ENSMUSG00000020866.15	Cacna1g	chr11	protein_coding	calcium channel, voltage-dependent, T type, alpha 1G subunit
chr11	5065098	5065304	chr11_23406_IP1	14	-	207	14	5065214	five_prime_UTR:0.42;intron:0.58;	ENSMUSG00000034201.11	Gas2l1	chr11	protein_coding	growth arrest-specific 2 like 1
chr11	20631996	20632098	chr11_19185_IP1	4	+	103	4	20632023	intron:1.0;	ENSMUSG00000049800.11	Sertad2	chr11	protein_coding	SERTA domain containing 2
chr11	115350876	115351074	chr11_27320_IP1	10	-	199	10	115350966	CDS:0.79;intron:0.21;	ENSMUSG00000034586.12	Hid1	chr11	protein_coding	HID1 domain containing
chr11	32735140	32735263	chr11_19520_IP1	4	+	124	4	32735165	CDS:1.0;	ENSMUSG00000020271.15	Fbxw11	chr11	protein_coding	F-box and WD-40 domain protein 11
chr11	49262735	49262909	chr11_19832_IP1	11	+	175	10	49262815	three_prime_UTR:1.0;	ENSMUSG00000020346.14	Mgat1	chr11	protein_coding	mannoside acetylglucosaminyltransferase 1
chr11	60105297	60105420	chr11_24910_IP1	4	-	124	4	60105304	antisense;	ENSMUSG00000062115.13	Rai1	chr11	protein_coding	retinoic acid induced 1
chr11	96004712	96004886	chr11_26379_IP1	4	-	175	4	96004739	intron:1.0;	ENSMUSG00000013415.7	Igf2bp1	chr11	protein_coding	insulin-like growth factor 2 mRNA binding protein 1
chr11	30100477	30100649	chr11_24070_IP1	4	-	173	4	30100502	three_prime_UTR:0.1;CDS:0.9;	ENSMUSG00000020315.16	Sptbn1	chr11	protein_coding	spectrin beta, non-erythrocytic 1
chr11	70027050	70027171	chr11_20679_IP1	4	+	122	4	70027062	intron:1.0;	ENSMUSG00000020886.14	Dlg4	chr11	protein_coding	discs, large homolog 4 (Drosophila)
chr11	80383517	80383713	chr11_21316_IP1	5	+	197	5	80383567	intron:1.0;	ENSMUSG00000017421.16	Zfp207	chr11	protein_coding	zinc finger protein 207
chr11	93885694	93885889	chr11_21626_IP1	6	+	196	6	93885814	five_prime_UTR:0.19;intron:0.81;	ENSMUSG00000059474.11	Mbtd1	chr11	protein_coding	mbt domain containing 1
chr11	44464000	44464174	chr11_24433_IP1	3	-	175	3	44464028	intron:1.0;	ENSMUSG00000041231.13	Ublcp1	chr11	protein_coding	ubiquitin-like domain containing CTD phosphatase 1
chr11	54908540	54908798	chr11_20082_IP1	9	+	259	7	54908540	CDS:0.46;intron:0.54;	ENSMUSG00000018339.9	Gpx3	chr11	protein_coding	glutathione peroxidase 3
chr11	22017023	22017263	chr11_19233_IP1	3	+	241	3	22017116	antisense;	ENSMUSG00000042302.12	Ehbp1	chr11	protein_coding	EH domain binding protein 1
chr11	17695217	17695401	chr11_23777_IP1	3	-	185	3	17695254	intergenic;	--
chr11	62602920	62603023	chr11_25087_IP1	3	-	104	3	62602951	antisense;	ENSMUSG00000086841.1	2410006H16Rik	chr11	processed_transcript	RIKEN cDNA 2410006H16 gene
chr11	105181665	105182013	chr11_27047_IP1	11	-	349	5	105181690	antisense;	ENSMUSG00000020694.14	Tlk2	chr11	protein_coding	tousled-like kinase 2 (Arabidopsis)
chr11	97500245	97500401	chr11_26484_IP1	4	-	157	4	97500296	five_prime_UTR:0.61;intron:0.39;	ENSMUSG00000047988.1	4933428G20Rik	chr11	protein_coding	RIKEN cDNA 4933428G20 gene
chr11	80089719	80089893	chr11_21300_IP1	6	+	175	6	80089769	five_prime_UTR:0.29;CDS:0.38;intron:0.33;	ENSMUSG00000017550.12	Atad5	chr11	protein_coding	ATPase family, AAA domain containing 5
chr11	70232931	70233165	chr11_25396_IP1	4	-	235	4	70233019	intergenic;	--
chr11	54903285	54903514	chr11_24721_IP1	3	-	230	3	54903368	antisense;	ENSMUSG00000018339.9	Gpx3	chr11	protein_coding	glutathione peroxidase 3
chr11	32642975	32643211	chr11_19516_IP1	6	+	237	4	32643102	intron:1.0;	ENSMUSG00000020271.15	Fbxw11	chr11	protein_coding	F-box and WD-40 domain protein 11
chr11	14872860	14873045	chr11_23721_IP1	3	-	186	3	14872899	intergenic;	--
chr11	98704864	98704975	chr11_26560_IP1	4	-	112	4	98704870	three_prime_UTR:0.32;CDS:0.68;	ENSMUSG00000017210.12	Med24	chr11	protein_coding	mediator complex subunit 24
chr11	6475156	6475270	chr11_18918_IP1	4	+	115	4	6475164	antisense;	ENSMUSG00000094483.2	Purb	chr11	protein_coding	purine rich element binding protein B
chr11	37562535	37562637	chr11_19609_IP1	3	+	103	3	37562549	intergenic;	--
chr11	3188684	3188988	chr11_18694_IP1	5	+	305	3	3188725	antisense;	ENSMUSG00000023764.16	Sfi1	chr11	protein_coding	Sfi1 homolog, spindle assembly associated (yeast)
chr11	78963490	78963541	chr11_25781_IP1	4	-	52	4	78963529	CDS:1.0;	ENSMUSG00000001123.13	Lgals9	chr11	protein_coding	lectin, galactose binding, soluble 9
chr11	120686683	120686808	chr11_23195_IP1	4	+	126	4	120686722	CDS:0.14;intron:0.86;	ENSMUSG00000025142.15	Aspscr1	chr11	protein_coding	alveolar soft part sarcoma chromosome region, candidate 1 (human)
chr11	86357931	86358262	chr11_25974_IP1	19	-	332	16	86358021	intergenic;	--
chr11	120784556	120784833	chr11_23217_IP1	5	+	278	5	120784686	intron:1.0;	ENSMUSG00000025156.14	Gps1	chr11	protein_coding	G protein pathway suppressor 1
chr11	3160023	3160104	chr11_23284_IP1	4	-	82	4	3160027	CDS:1.0;	ENSMUSG00000023764.16	Sfi1	chr11	protein_coding	Sfi1 homolog, spindle assembly associated (yeast)
chr11	50384660	50384736	chr11_19890_IP1	4	+	77	4	50384683	CDS:1.0;	ENSMUSG00000007850.14	Hnrnph1	chr11	protein_coding	heterogeneous nuclear ribonucleoprotein H1
chr11	116827596	116828030	chr11_27517_IP1	60	-	435	39	116827897	five_prime_UTR:0.07;CDS:0.62;intron:0.3;	ENSMUSG00000020814.11	Mxra7	chr11	protein_coding	matrix-remodelling associated 7
chr11	86314047	86314251	chr11_25971_IP1	4	-	205	4	86314157	intron:1.0;	ENSMUSG00000034297.12	Med13	chr11	protein_coding	mediator complex subunit 13
chr11	31870921	31871092	chr11_19472_IP1	3	+	172	3	31870945	intergenic;	--
chr11	88844573	88845011	chr11_26122_IP1	8	-	439	5	88844713	CDS:1.0;	ENSMUSG00000018428.13	Akap1	chr11	protein_coding	A kinase (PRKA) anchor protein 1
chr11	70392911	70393022	chr11_25401_IP1	4	-	112	4	70392951	three_prime_UTR:0.16;CDS:0.84;	ENSMUSG00000018921.9	Pelp1	chr11	protein_coding	proline, glutamic acid and leucine rich protein 1
chr11	58168348	58168516	chr11_24814_IP1	4	-	169	4	58168443	five_prime_UTR:0.38;CDS:0.63;	ENSMUSG00000037275.12	Gemin5	chr11	protein_coding	gem (nuclear organelle) associated protein 5
chr11	21091343	21091505	chr11_19203_IP1	9	+	163	9	21091408	five_prime_UTR:1.0;	ENSMUSG00000020134.11	Peli1	chr11	protein_coding	pellino 1
chr11	6620013	6620250	chr11_23544_IP1	6	-	238	5	6620061	CDS:0.55;intron:0.45;	ENSMUSG00000000384.13	Tbrg4	chr11	protein_coding	transforming growth factor beta regulated gene 4
chr11	95020026	95020218	chr11_21749_IP1	12	+	193	6	95020064	CDS:1.0;	ENSMUSG00000047181.10	Samd14	chr11	protein_coding	sterile alpha motif domain containing 14
chr11	61722813	61722978	chr11_25036_IP1	3	-	166	3	61722832	intergenic;	--
chr11	92639768	92640022	chr11_21601_IP1	3	+	255	3	92639875	intergenic;	--
chr11	102296402	102296677	chr11_26842_IP1	11	-	276	9	102296492	five_prime_UTR:0.83;intron:0.17;	ENSMUSG00000059995.10	Atxn7l3	chr11	protein_coding	ataxin 7-like 3
chr11	117266224	117266433	chr11_22829_IP1	4	+	210	4	117266332	five_prime_UTR:0.9;intron:0.1;	ENSMUSG00000059248.11	2020-09-09	chr11	protein_coding	septin 9
chr11	120632918	120633154	chr11_27837_IP1	11	-	237	9	120633051	intron:1.0;	ENSMUSG00000051510.11	Mafg	chr11	protein_coding	v-maf musculoaponeurotic fibrosarcoma oncogene family, protein G (avian)
chr11	72447555	72447639	chr11_20809_IP1	5	+	85	5	72447572	CDS:1.0;	ENSMUSG00000040463.14	Mybbp1a	chr11	protein_coding	MYB binding protein (P160) 1a
chr11	106458998	106459028	chr11_27114_IP1	6	-	31	6	106459024	CDS:1.0;	ENSMUSG00000020715.7	Ern1	chr11	protein_coding	endoplasmic reticulum (ER) to nucleus signalling 1
chr11	82010248	82010398	chr11_25859_IP1	3	-	151	3	82010251	intergenic;	--
chr11	42217462	42217709	chr11_24395_IP1	3	-	248	3	42217562	intergenic;	--
chr11	30953913	30954188	chr11_24125_IP1	9	-	276	8	30954012	five_prime_UTR:0.28;CDS:0.59;intron:0.13;	ENSMUSG00000020311.15	Erlec1	chr11	protein_coding	endoplasmic reticulum lectin 1
chr11	105336136	105336216	chr11_22372_IP1	6	+	81	6	105336137	CDS:1.0;	ENSMUSG00000020695.12	Mrc2	chr11	protein_coding	mannose receptor, C type 2
chr11	74843346	74843553	chr11_20908_IP1	13	+	208	12	74843482	three_prime_UTR:1.0;	ENSMUSG00000000282.10	Mnt	chr11	protein_coding	max binding protein
chr11	102839419	102839503	chr11_26918_IP1	4	-	85	4	102839419	CDS:1.0;	ENSMUSG00000020929.12	Eftud2	chr11	protein_coding	elongation factor Tu GTP binding domain containing 2
chr11	24962689	24962878	chr11_19314_IP1	3	+	190	3	24962732	intergenic;	--
chr11	119281112	119281261	chr11_22984_IP1	12	+	150	8	119281233	CDS:1.0;	ENSMUSG00000025579.12	Gaa	chr11	protein_coding	glucosidase, alpha, acid
chr11	120544888	120544928	chr11_27780_IP1	4	-	41	4	120544917	five_prime_UTR:1.0;	ENSMUSG00000061111.8	Fam195b	chr11	protein_coding	family with sequence similarity 195, member B
chr11	77243525	77243711	chr11_25685_IP1	3	-	187	3	77243566	antisense;	ENSMUSG00000037926.13	Ssh2	chr11	protein_coding	slingshot homolog 2 (Drosophila)
chr11	102162704	102162818	chr11_26792_IP1	4	-	115	4	102162747	three_prime_UTR:1.0;	ENSMUSG00000020922.9	Lsm12	chr11	protein_coding	LSM12 homolog (S. cerevisiae)
chr11	71004207	71004281	chr11_20781_IP1	4	+	75	4	71004218	antisense;	ENSMUSG00000040620.13	Dhx33	chr11	protein_coding	DEAH (Asp-Glu-Ala-His) box polypeptide 33
chr11	42583310	42583532	chr11_24403_IP1	3	-	223	3	42583396	antisense;	ENSMUSG00000007653.10	Gabrb2	chr11	protein_coding	gamma-aminobutyric acid (GABA) A receptor, subunit beta 2
chr11	120633167	120633531	chr11_27838_IP1	11	-	365	8	120633251	five_prime_UTR:0.47;intron:0.53;	ENSMUSG00000051510.11	Mafg	chr11	protein_coding	v-maf musculoaponeurotic fibrosarcoma oncogene family, protein G (avian)
chr11	120382322	120382626	chr11_27763_IP1	6	-	305	4	120382530	three_prime_UTR:0.48;CDS:0.52;	ENSMUSG00000039703.13	Nploc4	chr11	protein_coding	nuclear protein localization 4 homolog (S. cerevisiae)
chr11	94339756	94339874	chr11_21650_IP1	4	+	119	4	94339826	three_prime_UTR:1.0;	ENSMUSG00000020864.11	Ankrd40	chr11	protein_coding	ankyrin repeat domain 40
chr11	99386082	99386261	chr11_22088_IP1	3	+	180	3	99386116	antisense;	ENSMUSG00000019761.9	Krt10	chr11	protein_coding	keratin 10
chr11	120271774	120271970	chr11_23133_IP1	4	+	197	4	120271823	CDS:1.0;	ENSMUSG00000039741.13	Bahcc1	chr11	protein_coding	BAH domain and coiled-coil containing 1
chr11	75588124	75588220	chr11_25605_IP1	4	-	97	4	75588152	antisense;	ENSMUSG00000017781.15	Pitpna	chr11	protein_coding	phosphatidylinositol transfer protein, alpha
chr11	120383296	120383399	chr11_27764_IP1	4	-	104	4	120383296	CDS:1.0;	ENSMUSG00000039703.13	Nploc4	chr11	protein_coding	nuclear protein localization 4 homolog (S. cerevisiae)
chr11	77607294	77607380	chr11_21078_IP1	4	+	87	4	77607320	antisense;	ENSMUSG00000017291.11	Taok1	chr11	protein_coding	TAO kinase 1
chr11	58329686	58329732	chr11_24821_IP1	3	-	47	3	58329689	CDS:1.0;	ENSMUSG00000049755.12	Zfp672	chr11	protein_coding	zinc finger protein 672
chr11	103376524	103376704	chr11_26983_IP1	4	-	181	4	103376568	CDS:0.62;intron:0.38;	ENSMUSG00000034247.9	Plekhm1	chr11	protein_coding	pleckstrin homology domain containing, family M (with RUN domain) member 1
chr11	87802677	87802830	chr11_26053_IP1	3	-	154	3	87802684	antisense;	ENSMUSG00000009350.11	Mpo	chr11	protein_coding	myeloperoxidase
chr11	23256236	23256344	chr11_23917_IP1	4	-	109	4	23256259	antisense;	ENSMUSG00000020290.12	Xpo1	chr11	protein_coding	exportin 1, CRM1 homolog (yeast)
chr11	66420987	66421196	chr11_25150_IP1	3	-	210	3	66421054	intron:1.0;	ENSMUSG00000053930.11	Shisa6	chr11	protein_coding	shisa family member 6
chr11	70971799	70971847	chr11_20780_IP1	3	+	49	3	70971802	CDS:1.0;	ENSMUSG00000018449.10	Rpain	chr11	protein_coding	RPA interacting protein
chr11	19924653	19924821	chr11_19160_IP1	4	+	169	4	19924674	five_prime_UTR:1.0;	ENSMUSG00000045671.15	Spred2	chr11	protein_coding	sprouty-related, EVH1 domain containing 2
chr11	30009307	30009440	chr11_24065_IP1	3	-	134	3	30009310	intron:1.0;	ENSMUSG00000044072.12	Eml6	chr11	protein_coding	echinoderm microtubule associated protein like 6
chr11	97279853	97280071	chr11_21844_IP1	4	+	219	4	97279928	antisense;	ENSMUSG00000001441.11	Npepps	chr11	protein_coding	aminopeptidase puromycin sensitive
chr11	55446675	55446784	chr11_24778_IP1	8	-	110	8	55446692	three_prime_UTR:1.0;	ENSMUSG00000018585.9	Atox1	chr11	protein_coding	ATX1 (antioxidant protein 1) homolog 1 (yeast)
chr11	6389398	6389532	chr11_23515_IP1	7	-	135	7	6389428	antisense;	ENSMUSG00000041164.13	Zmiz2	chr11	protein_coding	zinc finger, MIZ-type containing 2
chr11	30103247	30103421	chr11_24073_IP1	5	-	175	5	30103281	CDS:1.0;	ENSMUSG00000020315.16	Sptbn1	chr11	protein_coding	spectrin beta, non-erythrocytic 1
chr11	49712488	49712659	chr11_19840_IP1	4	+	172	4	49712554	antisense;	ENSMUSG00000020362.11	Cnot6	chr11	protein_coding	CCR4-NOT transcription complex, subunit 6
chr11	12746289	12746456	chr11_23676_IP1	3	-	168	3	12746311	intergenic;	--
chr11	52119142	52119235	chr11_19958_IP1	9	+	94	9	52119152	CDS:1.0;	ENSMUSG00000020349.4	Ppp2ca	chr11	protein_coding	protein phosphatase 2 (formerly 2A), catalytic subunit, alpha isoform
chr11	69008404	69008584	chr11_20540_IP1	4	+	181	4	69008437	antisense;	ENSMUSG00000020899.13	Pfas	chr11	protein_coding	phosphoribosylformylglycinamidine synthase (FGAR amidotransferase)
chr11	4767386	4767531	chr11_23389_IP1	4	-	146	4	4767432	three_prime_UTR:1.0;	ENSMUSG00000009073.14	Nf2	chr11	protein_coding	neurofibromatosis 2
chr11	117312630	117312850	chr11_22841_IP1	4	+	221	4	117312763	intron:1.0;	ENSMUSG00000059248.11	2020-09-09	chr11	protein_coding	septin 9
chr11	88047809	88047940	chr11_21525_IP1	16	+	132	16	88047858	five_prime_UTR:0.22;CDS:0.78;	ENSMUSG00000018379.15	Srsf1	chr11	protein_coding	serine/arginine-rich splicing factor 1
chr11	50207159	50207301	chr11_24533_IP1	11	-	143	11	50207181	CDS:1.0;	ENSMUSG00000015837.13	Sqstm1	chr11	protein_coding	sequestosome 1
chr11	50234743	50234847	chr11_24540_IP1	4	-	105	4	50234789	antisense;	ENSMUSG00000036620.12	Mgat4b	chr11	protein_coding	mannoside acetylglucosaminyltransferase 4, isoenzyme B
chr11	5717940	5718075	chr11_23466_IP1	4	-	136	4	5718027	CDS:1.0;	ENSMUSG00000049680.15	Urgcp	chr11	protein_coding	upregulator of cell proliferation
chr11	33504784	33504828	chr11_24205_IP1	3	-	45	3	33504817	CDS:1.0;	ENSMUSG00000040594.16	Ranbp17	chr11	protein_coding	RAN binding protein 17
chr11	18900320	18900395	chr11_19145_IP1	3	+	76	3	18900323	antisense;	ENSMUSG00000020160.16	Meis1	chr11	protein_coding	Meis homeobox 1
chr11	48837699	48837860	chr11_19810_IP1	4	+	162	4	48837724	CDS:1.0;	ENSMUSG00000040350.13	Trim7	chr11	protein_coding	tripartite motif-containing 7
chr11	30138386	30138501	chr11_24096_IP1	4	-	116	4	30138476	CDS:1.0;	ENSMUSG00000020315.16	Sptbn1	chr11	protein_coding	spectrin beta, non-erythrocytic 1
chr11	9537818	9538038	chr11_23606_IP1	3	-	221	3	9537892	antisense;	ENSMUSG00000004668.12	Abca13	chr11	protein_coding	ATP-binding cassette, sub-family A (ABC1), member 13
chr11	96393557	96393757	chr11_26398_IP1	3	-	201	3	96393636	intergenic;	--
chr11	54522959	54523084	chr11_20070_IP1	3	+	126	3	54523054	five_prime_UTR:0.72;CDS:0.28;	ENSMUSG00000037533.15	Rapgef6	chr11	protein_coding	Rap guanine nucleotide exchange factor (GEF) 6
chr11	15256651	15256875	chr11_19079_IP1	4	+	225	4	15256728	intergenic;	--
chr11	102839178	102839257	chr11_26917_IP1	4	-	80	4	102839233	CDS:1.0;	ENSMUSG00000020929.12	Eftud2	chr11	protein_coding	elongation factor Tu GTP binding domain containing 2
chr11	72608110	72608415	chr11_20822_IP1	6	+	306	5	72608232	intron:1.0;	ENSMUSG00000020794.11	Ube2g1	chr11	protein_coding	ubiquitin-conjugating enzyme E2G 1
chr11	58496474	58496626	chr11_24826_IP1	3	-	153	3	58496480	intergenic;	--
chr11	6291474	6291866	chr11_18882_IP1	6	+	393	4	6291602	five_prime_UTR:0.16;intron:0.84;	ENSMUSG00000020456.15	Ogdh	chr11	protein_coding	oxoglutarate (alpha-ketoglutarate) dehydrogenase (lipoamide)
chr11	121702594	121702740	chr11_27957_IP1	5	-	147	5	121702605	antisense;	ENSMUSG00000039208.13	Metrnl	chr11	protein_coding	meteorin, glial cell differentiation regulator-like
chr11	57781991	57782170	chr11_20141_IP1	3	+	180	3	57782025	intron:1.0;	ENSMUSG00000020520.12	Galnt10	chr11	protein_coding	UDP-N-acetyl-alpha-D-galactosamine:polypeptide N-acetylgalactosaminyltransferase 10
chr11	87150022	87150160	chr11_26028_IP1	3	-	139	3	87150025	antisense;	ENSMUSG00000018548.13	Trim37	chr11	protein_coding	tripartite motif-containing 37
chr11	62538940	62539181	chr11_20409_IP1	5	+	242	5	62539068	antisense;	ENSMUSG00000018509.6	Cenpv	chr11	protein_coding	centromere protein V
chr11	116079036	116079103	chr11_27404_IP1	4	-	68	4	116079041	three_prime_UTR:1.0;	ENSMUSG00000034341.15	Wbp2	chr11	protein_coding	WW domain binding protein 2
chr11	102306503	102306737	chr11_26847_IP1	14	-	235	12	102306595	three_prime_UTR:0.25;CDS:0.75;	ENSMUSG00000020923.15	Ubtf	chr11	protein_coding	upstream binding transcription factor, RNA polymerase I
chr11	117986902	117987013	chr11_22912_IP1	4	+	112	4	117986934	CDS:1.0;	ENSMUSG00000017715.9	Pgs1	chr11	protein_coding	phosphatidylglycerophosphate synthase 1
chr11	73585455	73585635	chr11_20859_IP1	3	+	181	3	73585488	intergenic;	--
chr11	75759291	75759428	chr11_21006_IP1	8	+	138	5	75759398	CDS:1.0;	ENSMUSG00000020849.11	Ywhae	chr11	protein_coding	tyrosine 3-monooxygenase/tryptophan 5-monooxygenase activation protein, epsilon polypeptide
chr11	23306814	23306888	chr11_23921_IP1	3	-	75	3	23306819	intergenic;	--
chr11	6444183	6444371	chr11_23524_IP1	6	-	189	4	6444225	five_prime_UTR:0.07;CDS:0.02;intron:0.91;	ENSMUSG00000041126.14	H2afv	chr11	protein_coding	H2A histone family, member V
chr11	69633097	69633254	chr11_25301_IP1	4	-	158	4	69633131	antisense;	ENSMUSG00000018765.5	Fxr2	chr11	protein_coding	fragile X mental retardation, autosomal homolog 2
chr11	4213556	4213657	chr11_18759_IP1	4	+	102	4	4213563	CDS:1.0;	ENSMUSG00000034412.11	Tbc1d10a	chr11	protein_coding	TBC1 domain family, member 10a
chr11	14798799	14799042	chr11_23716_IP1	3	-	244	3	14798896	intergenic;	--
chr11	5061165	5061271	chr11_23398_IP1	6	-	107	6	5061186	intron:1.0;	ENSMUSG00000034201.11	Gas2l1	chr11	protein_coding	growth arrest-specific 2 like 1
chr11	69399883	69400110	chr11_25265_IP1	9	-	228	6	69399939	CDS:0.75;intron:0.25;	ENSMUSG00000018476.7	Kdm6b	chr11	protein_coding	KDM1 lysine (K)-specific demethylase 6B
chr11	70424524	70424638	chr11_20694_IP1	3	+	115	3	70424527	intergenic;	--
chr11	97680542	97680648	chr11_21914_IP1	7	+	107	7	97680594	CDS:1.0;	ENSMUSG00000038437.9	Mllt6	chr11	protein_coding	myeloid/lymphoid or mixed-lineage leukemia (trithorax homolog, Drosophila); translocated to, 6
chr11	69740998	69741144	chr11_25332_IP1	7	-	147	7	69741031	CDS:1.0;	ENSMUSG00000005198.13	Polr2a	chr11	protein_coding	polymerase (RNA) II (DNA directed) polypeptide A
chr11	16950881	16950930	chr11_23763_IP1	4	-	50	4	16950881	noncoding_exon:1.0;	ENSMUSG00000087060.5	Eldr	chr11	processed_transcript	Egfr long non-coding downstream RNA
chr11	55399209	55399325	chr11_24769_IP1	8	-	117	8	55399316	CDS:1.0;	ENSMUSG00000018593.10	Sparc	chr11	protein_coding	secreted acidic cysteine rich glycoprotein
chr11	69847390	69847533	chr11_20628_IP1	4	+	144	4	69847449	CDS:1.0;	ENSMUSG00000019461.10	Plscr3	chr11	protein_coding	phospholipid scramblase 3
chr11	74867340	74867482	chr11_25564_IP1	4	-	143	4	74867351	intron:1.0;	ENSMUSG00000038351.12	Sgsm2	chr11	protein_coding	small G protein signaling modulator 2
chr11	37915264	37915547	chr11_19615_IP1	3	+	284	3	37915400	intergenic;	--
chr11	26684400	26684594	chr11_24000_IP1	3	-	195	3	26684447	intergenic;	--
chr11	88081643	88081667	chr11_21530_IP1	3	+	25	3	88081645	CDS:1.0;	ENSMUSG00000018377.8	Vezf1	chr11	protein_coding	vascular endothelial zinc finger 1
chr11	108328212	108328316	chr11_27195_IP1	4	-	105	4	108328215	intron:1.0;	ENSMUSG00000050965.12	Prkca	chr11	protein_coding	protein kinase C, alpha
chr11	69088358	69088627	chr11_20560_IP1	7	+	270	5	69088548	five_prime_UTR:0.51;CDS:0.01;intron:0.49;	ENSMUSG00000020894.14	Vamp2	chr11	protein_coding	vesicle-associated membrane protein 2
chr11	59801042	59801177	chr11_24889_IP1	4	-	136	4	59801098	CDS:1.0;	ENSMUSG00000032633.10	Flcn	chr11	protein_coding	folliculin
chr11	50430783	50430957	chr11_24570_IP1	4	-	175	4	50430812	CDS:1.0;	ENSMUSG00000020375.7	Rufy1	chr11	protein_coding	RUN and FYVE domain containing 1
chr11	35164387	35164534	chr11_24224_IP1	3	-	148	3	35164390	antisense;	ENSMUSG00000056427.8	Slit3	chr11	protein_coding	slit homolog 3 (Drosophila)
chr11	58346233	58346531	chr11_20190_IP1	8	+	299	7	58346310	three_prime_UTR:0.45;CDS:0.55;	ENSMUSG00000013646.15	Sh3bp5l	chr11	protein_coding	SH3 binding domain protein 5 like
chr11	115240364	115240421	chr11_22651_IP1	3	+	58	3	115240367	intron:1.0;	ENSMUSG00000045980.11	Tmem104	chr11	protein_coding	transmembrane protein 104
chr11	69369135	69369314	chr11_25260_IP1	4	-	180	4	69369167	CDS:1.0;	ENSMUSG00000018474.15	Chd3	chr11	protein_coding	chromodomain helicase DNA binding protein 3
chr11	31032031	31032314	chr11_19460_IP1	4	+	284	3	31032127	intron:1.0;	ENSMUSG00000020305.11	Asb3	chr11	protein_coding	ankyrin repeat and SOCS box-containing 3
chr11	65788112	65788274	chr11_25146_IP1	7	-	163	7	65788159	five_prime_UTR:0.19;CDS:0.67;intron:0.14;	ENSMUSG00000033352.9	Map2k4	chr11	protein_coding	mitogen-activated protein kinase kinase 4
chr11	30138591	30138715	chr11_24097_IP1	4	-	125	4	30138591	CDS:1.0;	ENSMUSG00000020315.16	Sptbn1	chr11	protein_coding	spectrin beta, non-erythrocytic 1
chr11	53770337	53770510	chr11_20040_IP1	4	+	174	4	53770363	five_prime_UTR:0.09;intron:0.91;	ENSMUSG00000018899.14	Irf1	chr11	protein_coding	interferon regulatory factor 1
chr11	89008895	89009040	chr11_21551_IP1	4	+	146	4	89008940	intron:1.0;	ENSMUSG00000000275.14	Trim25	chr11	protein_coding	tripartite motif-containing 25
chr11	45852051	45852175	chr11_19763_IP1	5	+	125	5	45852073	five_prime_UTR:0.81;CDS:0.19;	ENSMUSG00000006169.17	Clint1	chr11	protein_coding	clathrin interactor 1
chr11	30104507	30104548	chr11_24075_IP1	4	-	42	4	30104510	CDS:1.0;	ENSMUSG00000020315.16	Sptbn1	chr11	protein_coding	spectrin beta, non-erythrocytic 1
chr11	28203456	28203658	chr11_19367_IP1	3	+	203	3	28203513	intergenic;	--
chr11	86630536	86630691	chr11_25985_IP1	4	-	156	4	86630553	intron:1.0;	ENSMUSG00000018171.7	Vmp1	chr11	protein_coding	vacuole membrane protein 1
chr11	44564609	44564693	chr11_19742_IP1	4	+	85	4	44564613	three_prime_UTR:1.0;	ENSMUSG00000019189.11	Rnf145	chr11	protein_coding	ring finger protein 145
chr11	57645568	57645712	chr11_20133_IP1	4	+	145	4	57645586	CDS:1.0;	ENSMUSG00000020520.12	Galnt10	chr11	protein_coding	UDP-N-acetyl-alpha-D-galactosamine:polypeptide N-acetylgalactosaminyltransferase 10
chr11	113562005	113562011	chr11_27279_IP1	4	-	7	4	113562005	CDS:1.0;	ENSMUSG00000041654.13	Slc39a11	chr11	protein_coding	solute carrier family 39 (metal ion transporter), member 11
chr11	120467713	120467763	chr11_23158_IP1	5	+	51	5	120467731	five_prime_UTR:0.26;CDS:0.74;	ENSMUSG00000025793.13	Hgs	chr11	protein_coding	HGF-regulated tyrosine kinase substrate
chr11	80159048	80159199	chr11_25833_IP1	3	-	152	3	80159052	noncoding_exon:1.0;	ENSMUSG00000086507.1	Adap2os	chr11	antisense	ArfGAP with dual PH domains 2, opposite strand
chr11	114757761	114757780	chr11_27306_IP1	3	-	20	3	114757763	antisense;	ENSMUSG00000034706.14	Dnaic2	chr11	protein_coding	dynein, axonemal, intermediate chain 2
chr11	18012518	18012643	chr11_19133_IP1	3	+	126	3	18012521	intergenic;	--
chr11	98149338	98149596	chr11_26530_IP1	7	-	259	7	98149449	five_prime_UTR:0.93;CDS:0.07;	ENSMUSG00000020883.16	Fbxl20	chr11	protein_coding	F-box and leucine-rich repeat protein 20
chr11	101634787	101634828	chr11_22214_IP1	4	+	42	4	101634789	CDS:1.0;	ENSMUSG00000010362.7	Rdm1	chr11	protein_coding	RAD52 motif 1
chr11	50252703	50252905	chr11_24542_IP1	3	-	203	3	50252759	antisense;	ENSMUSG00000097887.1	Gm26542	chr11	lincRNA	predicted gene, 26542
chr11	60417837	60417921	chr11_24964_IP1	4	-	85	4	60417843	antisense;	ENSMUSG00000018415.12	Gid4	chr11	protein_coding	GID complex subunit 4, VID24 homolog (S. cerevisiae)
chr11	112784897	112785161	chr11_22596_IP1	8	+	265	8	112785014	CDS:1.0;	ENSMUSG00000000567.5	Sox9	chr11	protein_coding	SRY (sex determining region Y)-box 9
chr11	29847588	29847728	chr11_19411_IP1	3	+	141	3	29847591	antisense;	ENSMUSG00000044072.12	Eml6	chr11	protein_coding	echinoderm microtubule associated protein like 6
chr11	117266455	117266576	chr11_22830_IP1	6	+	122	6	117266477	five_prime_UTR:0.7;CDS:0.3;	ENSMUSG00000059248.11	2020-09-09	chr11	protein_coding	septin 9
chr11	29373591	29373862	chr11_24039_IP1	4	-	272	4	29373715	antisense;	ENSMUSG00000032740.14	Ccdc88a	chr11	protein_coding	coiled coil domain containing 88A
chr11	45890621	45890799	chr11_19770_IP1	4	+	179	4	45890702	CDS:1.0;	ENSMUSG00000006169.17	Clint1	chr11	protein_coding	clathrin interactor 1
chr11	3452208	3452340	chr11_23313_IP1	4	-	133	4	3452248	five_prime_UTR:1.0;	ENSMUSG00000020448.14	Rnf185	chr11	protein_coding	ring finger protein 185
chr11	60176131	60176298	chr11_20266_IP1	6	+	168	6	60176186	intron:1.0;	ENSMUSG00000062115.13	Rai1	chr11	protein_coding	retinoic acid induced 1
chr11	78246054	78246170	chr11_21190_IP1	4	+	117	4	78246117	CDS:1.0;	ENSMUSG00000002064.10	Sdf2	chr11	protein_coding	stromal cell derived factor 2
chr11	84444053	84444178	chr11_25926_IP1	4	-	126	4	84444056	intron:1.0;	ENSMUSG00000018697.12	Aatf	chr11	protein_coding	apoptosis antagonizing transcription factor
chr11	43886601	43886836	chr11_19726_IP1	3	+	236	3	43886690	antisense;	ENSMUSG00000050541.12	Adra1b	chr11	protein_coding	adrenergic receptor, alpha 1b
chr11	97945776	97945906	chr11_26515_IP1	4	-	131	4	97945807	intron:1.0;	ENSMUSG00000017417.12	Plxdc1	chr11	protein_coding	plexin domain containing 1
chr11	116158210	116158360	chr11_27437_IP1	6	-	151	6	116158221	intron:1.0;	ENSMUSG00000020776.16	Fbf1	chr11	protein_coding	Fas (TNFRSF6) binding factor 1
chr11	101082998	101083159	chr11_22147_IP1	4	+	162	4	101083022	five_prime_UTR:0.07;CDS:0.93;	ENSMUSG00000001755.10	Coasy	chr11	protein_coding	Coenzyme A synthase
chr11	100935343	100935480	chr11_26726_IP1	4	-	138	4	100935378	intron:1.0;	ENSMUSG00000004040.14	Stat3	chr11	protein_coding	signal transducer and activator of transcription 3
chr11	5064973	5065094	chr11_23405_IP1	12	-	122	10	5065053	five_prime_UTR:1.0;	ENSMUSG00000034201.11	Gas2l1	chr11	protein_coding	growth arrest-specific 2 like 1
chr11	39207974	39208228	chr11_24333_IP1	4	-	255	4	39208081	intergenic;	--
chr11	69350485	69350642	chr11_25255_IP1	7	-	158	7	69350538	intron:1.0;	ENSMUSG00000018474.15	Chd3	chr11	protein_coding	chromodomain helicase DNA binding protein 3
chr11	25708708	25708860	chr11_19325_IP1	3	+	153	3	25708713	antisense;	ENSMUSG00000032985.13	5730522E02Rik	chr11	protein_coding	RIKEN cDNA 5730522E02 gene
chr11	23306613	23306978	chr11_19268_IP1	33	+	366	25	23306789	five_prime_UTR:0.22;CDS:0.01;intron:0.77;	ENSMUSG00000056342.14	Usp34	chr11	protein_coding	ubiquitin specific peptidase 34
chr11	120990804	120991274	chr11_27933_IP1	17	-	471	8	120991054	five_prime_UTR:0.56;CDS:0.16;intron:0.28;	ENSMUSG00000025162.15	Csnk1d	chr11	protein_coding	casein kinase 1, delta
chr11	64773220	64773370	chr11_25122_IP1	3	-	151	3	64773223	intergenic;	--
chr11	102317832	102318142	chr11_22239_IP1	11	+	311	9	102318024	antisense;	ENSMUSG00000020923.15	Ubtf	chr11	protein_coding	upstream binding transcription factor, RNA polymerase I
chr11	84391509	84391627	chr11_21409_IP1	4	+	119	4	84391527	CDS:1.0;	ENSMUSG00000020532.16	Acaca	chr11	protein_coding	acetyl-Coenzyme A carboxylase alpha
chr11	105347656	105347767	chr11_22388_IP1	8	+	112	7	105347744	CDS:1.0;	ENSMUSG00000020695.12	Mrc2	chr11	protein_coding	mannose receptor, C type 2
chr11	95963271	95963507	chr11_26374_IP1	4	-	237	4	95963383	three_prime_UTR:0.97;CDS:0.03;	ENSMUSG00000013415.7	Igf2bp1	chr11	protein_coding	insulin-like growth factor 2 mRNA binding protein 1
chr11	70703803	70703878	chr11_20745_IP1	6	+	76	5	70703863	CDS:1.0;	ENSMUSG00000020821.15	Kif1c	chr11	protein_coding	kinesin family member 1C
chr11	5874025	5874201	chr11_23482_IP1	5	-	177	5	5874054	CDS:1.0;	ENSMUSG00000020471.9	Pold2	chr11	protein_coding	polymerase (DNA directed), delta 2, regulatory subunit
chr11	97500806	97500904	chr11_26485_IP1	4	-	99	4	97500844	antisense;	ENSMUSG00000049807.14	Arhgap23	chr11	protein_coding	Rho GTPase activating protein 23
chr11	117934268	117934427	chr11_27560_IP1	3	-	160	3	117934280	intergenic;	--
chr11	6395124	6395143	chr11_23516_IP1	3	-	20	3	6395124	antisense;	ENSMUSG00000041164.13	Zmiz2	chr11	protein_coding	zinc finger, MIZ-type containing 2
chr11	120494476	120494561	chr11_23173_IP1	5	+	86	4	120494499	CDS:1.0;	ENSMUSG00000025792.7	Slc25a10	chr11	protein_coding	solute carrier family 25 (mitochondrial carrier, dicarboxylate transporter), member 10
chr11	65010104	65010335	chr11_25128_IP1	5	-	232	5	65010220	intron:1.0;	ENSMUSG00000033389.14	Arhgap44	chr11	protein_coding	Rho GTPase activating protein 44
chr11	115789243	115789360	chr11_22711_IP1	6	+	118	6	115789299	CDS:1.0;	ENSMUSG00000020747.15	2310067B10Rik	chr11	protein_coding	RIKEN cDNA 2310067B10 gene
chr11	86807489	86807583	chr11_26006_IP1	4	-	95	4	86807497	five_prime_UTR:0.36;CDS:0.64;	ENSMUSG00000018425.16	Dhx40	chr11	protein_coding	DEAH (Asp-Glu-Ala-His) box polypeptide 40
chr11	50200859	50200947	chr11_24525_IP1	9	-	89	9	50200917	CDS:1.0;	ENSMUSG00000015837.13	Sqstm1	chr11	protein_coding	sequestosome 1
chr11	13117408	13117667	chr11_23680_IP1	3	-	260	3	13117522	intergenic;	--
chr11	78059653	78059759	chr11_21160_IP1	4	+	107	4	78059670	three_prime_UTR:1.0;	ENSMUSG00000061981.12	Flot2	chr11	protein_coding	flotillin 2
chr11	118260560	118260691	chr11_27582_IP1	4	-	132	4	118260563	three_prime_UTR:1.0;	ENSMUSG00000033909.15	Usp36	chr11	protein_coding	ubiquitin specific peptidase 36
chr11	49262529	49262682	chr11_19831_IP1	5	+	154	5	49262572	three_prime_UTR:1.0;	ENSMUSG00000020346.14	Mgat1	chr11	protein_coding	mannoside acetylglucosaminyltransferase 1
chr11	69415961	69416187	chr11_20587_IP1	8	+	227	6	69416100	intergenic;	--
chr11	79580795	79580974	chr11_21267_IP1	8	+	180	8	79580857	three_prime_UTR:1.0;	ENSMUSG00000020716.13	Nf1	chr11	protein_coding	neurofibromatosis 1
chr11	22990639	22990791	chr11_19248_IP1	6	+	153	6	22990656	five_prime_UTR:0.68;CDS:0.25;intron:0.07;	ENSMUSG00000007739.8	Cct4	chr11	protein_coding	chaperonin containing Tcp1, subunit 4 (delta)
chr11	93995918	93996079	chr11_21632_IP1	4	+	162	4	93995957	intergenic;	--
chr11	50292039	50292222	chr11_19881_IP1	5	+	184	4	50292050	antisense;	ENSMUSG00000050567.14	Maml1	chr11	protein_coding	mastermind like 1 (Drosophila)
chr11	115393947	115394111	chr11_22676_IP1	6	+	165	6	115393973	CDS:1.0;	ENSMUSG00000050910.5	Cdr2l	chr11	protein_coding	cerebellar degeneration-related protein 2-like
chr11	116982674	116982825	chr11_22798_IP1	3	+	152	3	116982679	intron:1.0;	ENSMUSG00000043857.14	Mgat5b	chr11	protein_coding	mannoside acetylglucosaminyltransferase 5, isoenzyme B
chr11	87358242	87358408	chr11_26034_IP1	8	-	167	8	87358283	intron:1.0;	ENSMUSG00000046442.4	Ppm1e	chr11	protein_coding	protein phosphatase 1E (PP2C domain containing)
chr11	58319700	58319932	chr11_20182_IP1	3	+	233	3	58319786	antisense;	ENSMUSG00000049755.12	Zfp672	chr11	protein_coding	zinc finger protein 672
chr11	69777950	69778137	chr11_20620_IP1	6	+	188	6	69777990	intron:1.0;	ENSMUSG00000018750.12	Zbtb4	chr11	protein_coding	zinc finger and BTB domain containing 4
chr11	65114786	65114935	chr11_20456_IP1	3	+	150	3	65114788	antisense;	ENSMUSG00000033389.14	Arhgap44	chr11	protein_coding	Rho GTPase activating protein 44
chr11	6348685	6348808	chr11_18893_IP1	4	+	124	4	6348712	CDS:1.0;	ENSMUSG00000020456.15	Ogdh	chr11	protein_coding	oxoglutarate (alpha-ketoglutarate) dehydrogenase (lipoamide)
chr11	117828219	117828381	chr11_22898_IP1	4	+	163	4	117828256	intron:1.0;	ENSMUSG00000093485.1	Gm20708	chr11	protein_coding	predicted gene 20708
chr11	98030248	98030326	chr11_26518_IP1	3	-	79	3	98030251	antisense;	ENSMUSG00000017404.10	Rpl19	chr11	protein_coding	ribosomal protein L19
chr11	117156858	117157013	chr11_22815_IP1	10	+	156	10	117156957	CDS:0.28;intron:0.72;	ENSMUSG00000020823.14	Sec14l1	chr11	protein_coding	SEC14-like 1 (S. cerevisiae)
chr11	77471793	77472010	chr11_25692_IP1	4	-	218	4	77471895	CDS:0.14;intron:0.86;	ENSMUSG00000037907.14	Ankrd13b	chr11	protein_coding	ankyrin repeat domain 13b
chr11	90974506	90974648	chr11_26166_IP1	3	-	143	3	90974509	intergenic;	--
chr11	70700442	70700709	chr11_20740_IP1	10	+	268	9	70700569	five_prime_UTR:0.5;intron:0.5;	ENSMUSG00000020821.15	Kif1c	chr11	protein_coding	kinesin family member 1C
chr11	118009113	118009197	chr11_22917_IP1	4	+	85	4	118009150	intron:1.0;	ENSMUSG00000017715.9	Pgs1	chr11	protein_coding	phosphatidylglycerophosphate synthase 1
chr11	118355187	118355296	chr11_22944_IP1	6	+	110	6	118355221	antisense;	ENSMUSG00000017466.7	Timp2	chr11	protein_coding	tissue inhibitor of metalloproteinase 2
chr11	115791993	115792057	chr11_22715_IP1	6	+	65	6	115791997	CDS:1.0;	ENSMUSG00000020747.15	2310067B10Rik	chr11	protein_coding	RIKEN cDNA 2310067B10 gene
chr11	94211418	94211445	chr11_21641_IP1	3	+	28	3	94211419	intergenic;	--
chr11	97836071	97836320	chr11_21932_IP1	4	+	250	4	97836177	three_prime_UTR:0.3;CDS:0.7;	ENSMUSG00000038366.13	Lasp1	chr11	protein_coding	LIM and SH3 protein 1
chr11	103094521	103094738	chr11_26952_IP1	4	-	218	4	103094591	intron:1.0;	ENSMUSG00000020937.12	Plcd3	chr11	protein_coding	phospholipase C, delta 3
chr11	41576576	41576841	chr11_24384_IP1	3	-	266	3	41576695	intergenic;	--
chr11	103117829	103117973	chr11_26956_IP1	4	-	145	4	103117832	antisense;	ENSMUSG00000048878.6	Hexim1	chr11	protein_coding	hexamethylene bis-acetamide inducible 1
chr11	120714272	120714355	chr11_23209_IP1	4	+	84	4	120714272	five_prime_UTR:0.43;CDS:0.57;	ENSMUSG00000025145.11	Lrrc45	chr11	protein_coding	leucine rich repeat containing 45
chr11	52118668	52118758	chr11_19957_IP1	7	+	91	7	52118719	CDS:1.0;	ENSMUSG00000020349.4	Ppp2ca	chr11	protein_coding	protein phosphatase 2 (formerly 2A), catalytic subunit, alpha isoform
chr11	78341992	78342214	chr11_21212_IP1	8	+	223	8	78342067	three_prime_UTR:0.92;CDS:0.08;	ENSMUSG00000041958.10	Pigs	chr11	protein_coding	phosphatidylinositol glycan anchor biosynthesis, class S
chr11	52376390	52376517	chr11_19973_IP1	4	+	128	4	52376415	CDS:1.0;	ENSMUSG00000020402.9	Vdac1	chr11	protein_coding	voltage-dependent anion channel 1
chr11	81687832	81687992	chr11_25855_IP1	3	-	161	3	81687846	intron:1.0;	ENSMUSG00000020704.11	Asic2	chr11	protein_coding	acid-sensing (proton-gated) ion channel 2
chr11	95679778	95679962	chr11_21783_IP1	10	+	185	10	95679887	three_prime_UTR:0.3;CDS:0.7;	ENSMUSG00000038845.9	Phb	chr11	protein_coding	prohibitin
chr11	105350294	105350427	chr11_22392_IP1	6	+	134	6	105350339	three_prime_UTR:1.0;	ENSMUSG00000020695.12	Mrc2	chr11	protein_coding	mannose receptor, C type 2
chr11	97669430	97669613	chr11_21902_IP1	6	+	184	6	97669526	CDS:1.0;	ENSMUSG00000038437.9	Mllt6	chr11	protein_coding	myeloid/lymphoid or mixed-lineage leukemia (trithorax homolog, Drosophila); translocated to, 6
chr11	50145232	50145320	chr11_19854_IP1	4	+	89	4	50145241	CDS:0.26;intron:0.74;	ENSMUSG00000036644.13	Tbc1d9b	chr11	protein_coding	TBC1 domain family, member 9B
chr11	69302851	69302954	chr11_25242_IP1	4	-	104	4	69302851	CDS:1.0;	ENSMUSG00000032782.17	Cntrob	chr11	protein_coding	centrobin, centrosomal BRCA2 interacting protein
chr11	74858860	74858925	chr11_25561_IP1	4	-	66	4	74858862	CDS:1.0;	ENSMUSG00000038351.12	Sgsm2	chr11	protein_coding	small G protein signaling modulator 2
chr11	104442311	104442506	chr11_27022_IP1	8	-	196	8	104442359	intron:1.0;	ENSMUSG00000018412.14	Kansl1	chr11	protein_coding	KAT8 regulatory NSL complex subunit 1
chr11	120348185	120348413	chr11_27754_IP1	8	-	229	8	120348266	intron:1.0;	ENSMUSG00000062825.13	Actg1	chr11	protein_coding	actin, gamma, cytoplasmic 1
chr11	115585676	115585840	chr11_27343_IP1	4	-	165	4	115585764	three_prime_UTR:0.32;CDS:0.68;	ENSMUSG00000020740.11	Gga3	chr11	protein_coding	golgi associated, gamma adaptin ear containing, ARF binding protein 3
chr11	99350071	99350219	chr11_22087_IP1	3	+	149	3	99350074	antisense;	ENSMUSG00000017588.2	Krt27	chr11	protein_coding	keratin 27
chr11	14294016	14294262	chr11_23703_IP1	3	-	247	3	14294122	intergenic;	--
chr11	97663451	97663558	chr11_21896_IP1	5	+	108	5	97663468	five_prime_UTR:1.0;	ENSMUSG00000038437.9	Mllt6	chr11	protein_coding	myeloid/lymphoid or mixed-lineage leukemia (trithorax homolog, Drosophila); translocated to, 6
chr11	86298930	86299123	chr11_25969_IP1	4	-	194	4	86298999	CDS:1.0;	ENSMUSG00000034297.12	Med13	chr11	protein_coding	mediator complex subunit 13
chr11	23364165	23364306	chr11_19274_IP1	4	+	142	4	23364208	CDS:1.0;	ENSMUSG00000056342.14	Usp34	chr11	protein_coding	ubiquitin specific peptidase 34
chr11	28138389	28138638	chr11_19365_IP1	4	+	250	3	28138450	intergenic;	--
chr11	98960336	98960473	chr11_22066_IP1	4	+	138	4	98960382	intron:1.0;	ENSMUSG00000037992.14	Rara	chr11	protein_coding	retinoic acid receptor, alpha
chr11	39242011	39242206	chr11_24334_IP1	3	-	196	3	39242060	intergenic;	--
chr11	3289838	3290078	chr11_18703_IP1	10	+	241	10	3289931	five_prime_UTR:0.36;intron:0.64;	ENSMUSG00000020453.15	Patz1	chr11	protein_coding	POZ (BTB) and AT hook containing zinc finger 1
chr11	28501929	28502128	chr11_19372_IP1	3	+	200	3	28501981	antisense;	ENSMUSG00000032878.14	Ccdc85a	chr11	protein_coding	coiled-coil domain containing 85A
chr11	6107926	6108076	chr11_23491_IP1	4	-	151	4	6107934	three_prime_UTR:1.0;	ENSMUSG00000053838.12	Nudcd3	chr11	protein_coding	NudC domain containing 3
chr11	72179618	72179855	chr11_25472_IP1	4	-	238	4	72179708	intron:1.0;	ENSMUSG00000020807.12	4933427D14Rik	chr11	protein_coding	RIKEN cDNA 4933427D14 gene
chr11	117969001	117969126	chr11_27566_IP1	6	-	126	6	117969013	five_prime_UTR:1.0;	ENSMUSG00000053113.3	Socs3	chr11	protein_coding	suppressor of cytokine signaling 3
chr11	15600682	15600846	chr11_19092_IP1	3	+	165	3	15600700	intergenic;	--
chr11	115163553	115163691	chr11_22645_IP1	4	+	139	4	115163605	CDS:1.0;	ENSMUSG00000020733.3	Slc9a3r1	chr11	protein_coding	solute carrier family 9 (sodium/hydrogen exchanger), member 3 regulator 1
chr11	105180779	105181066	chr11_27045_IP1	10	-	288	7	105180947	noncoding_exon:1.0;	ENSMUSG00000099681.1	1700052K11Rik	chr11	antisense	RIKEN cDNA 1700052K11 gene
chr11	13894034	13894190	chr11_23693_IP1	3	-	157	3	13894043	intergenic;	--
chr11	120348490	120348690	chr11_27756_IP1	3	-	201	3	120348544	five_prime_UTR:0.26;intron:0.74;	ENSMUSG00000062825.13	Actg1	chr11	protein_coding	actin, gamma, cytoplasmic 1
chr11	72307197	72307387	chr11_20798_IP1	3	+	191	3	72307258	intron:1.0;	ENSMUSG00000040483.13	Xaf1	chr11	protein_coding	XIAP associated factor 1
chr11	94474389	94474569	chr11_21656_IP1	4	+	181	4	94474424	intergenic;	--
chr11	120598104	120598330	chr11_27809_IP1	8	-	227	8	120598197	CDS:1.0;	ENSMUSG00000025134.2	Alyref	chr11	protein_coding	Aly/REF export factor
chr11	98892062	98892188	chr11_22043_IP1	4	+	127	4	98892062	CDS:1.0;	ENSMUSG00000038013.12	Wipf2	chr11	protein_coding	WAS/WASL interacting protein family, member 2
chr11	44470217	44470366	chr11_24435_IP1	4	-	150	4	44470233	intron:1.0;	ENSMUSG00000041231.13	Ublcp1	chr11	protein_coding	ubiquitin-like domain containing CTD phosphatase 1
chr11	60779485	60779675	chr11_20340_IP1	4	+	191	4	60779528	CDS:1.0;	ENSMUSG00000049323.8	Smcr8	chr11	protein_coding	Smith-Magenis syndrome chromosome region, candidate 8 homolog (human)
chr11	62648626	62648745	chr11_20422_IP1	4	+	120	4	62648630	intergenic;	--
chr11	53420435	53420537	chr11_20009_IP1	4	+	103	4	53420447	three_prime_UTR:1.0;	ENSMUSG00000049470.11	Aff4	chr11	protein_coding	AF4/FMR2 family, member 4
chr11	54260491	54260667	chr11_24699_IP1	3	-	177	3	54260521	intergenic;	--
chr11	38186580	38186880	chr11_19622_IP1	4	+	301	3	38186704	intergenic;	--
chr11	117157441	117157534	chr11_22816_IP1	4	+	94	4	117157451	intron:1.0;	ENSMUSG00000020823.14	Sec14l1	chr11	protein_coding	SEC14-like 1 (S. cerevisiae)
chr11	87987360	87987621	chr11_21524_IP1	9	+	262	7	87987474	antisense;	ENSMUSG00000020483.12	Dynll2	chr11	protein_coding	dynein light chain LC8-type 2
chr11	93996441	93996719	chr11_26230_IP1	4	-	279	4	93996572	antisense;	ENSMUSG00000020859.14	Spag9	chr11	protein_coding	sperm associated antigen 9
chr11	76494411	76494522	chr11_25660_IP1	4	-	112	4	76494418	intron:1.0;	ENSMUSG00000017631.16	Abr	chr11	protein_coding	active BCR-related gene
chr11	29374116	29374265	chr11_19391_IP1	4	+	150	4	29374137	five_prime_UTR:1.0;	ENSMUSG00000032740.14	Ccdc88a	chr11	protein_coding	coiled coil domain containing 88A
chr11	77476362	77476468	chr11_25695_IP1	4	-	107	4	77476396	CDS:1.0;	ENSMUSG00000037907.14	Ankrd13b	chr11	protein_coding	ankyrin repeat domain 13b
chr11	13585513	13585669	chr11_19042_IP1	3	+	157	3	13585522	intergenic;	--
chr11	97837197	97837334	chr11_21934_IP1	4	+	138	4	97837260	three_prime_UTR:1.0;	ENSMUSG00000038366.13	Lasp1	chr11	protein_coding	LIM and SH3 protein 1
chr11	33080593	33080797	chr11_19529_IP1	3	+	205	3	33080650	intergenic;	--
chr11	98695522	98695631	chr11_21997_IP1	4	+	110	4	98695567	three_prime_UTR:0.28;CDS:0.72;	ENSMUSG00000017221.12	Psmd3	chr11	protein_coding	proteasome (prosome, macropain) 26S subunit, non-ATPase, 3
chr11	115344319	115344422	chr11_22665_IP1	3	+	104	3	115344322	CDS:1.0;	ENSMUSG00000018862.9	Otop3	chr11	protein_coding	otopetrin 3
chr11	51989981	51990094	chr11_24621_IP1	4	-	114	4	51989999	intron:1.0;	ENSMUSG00000097219.1	Gm26551	chr11	lincRNA	predicted gene, 26551
chr11	72273876	72274067	chr11_25477_IP1	3	-	192	3	72273922	intergenic;	--
chr11	23497562	23497751	chr11_23931_IP1	7	-	190	7	23497604	intron:1.0;	ENSMUSG00000020288.11	Ahsa2	chr11	protein_coding	AHA1, activator of heat shock protein ATPase 2
chr11	58059107	58059251	chr11_20161_IP1	4	+	145	4	58059182	three_prime_UTR:1.0;	ENSMUSG00000037331.13	Larp1	chr11	protein_coding	La ribonucleoprotein domain family, member 1
chr11	69903910	69904017	chr11_20633_IP1	4	+	108	4	69903992	CDS:1.0;	ENSMUSG00000047284.12	Neurl4	chr11	protein_coding	neuralized E3 ubiquitin protein ligase 4
chr11	95021385	95021456	chr11_21751_IP1	5	+	72	5	95021385	CDS:1.0;	ENSMUSG00000047181.10	Samd14	chr11	protein_coding	sterile alpha motif domain containing 14
chr11	59421524	59421627	chr11_24870_IP1	4	-	104	4	59421550	CDS:1.0;	ENSMUSG00000009894.13	Snap47	chr11	protein_coding	synaptosomal-associated protein, 47
chr11	101577944	101578037	chr11_22205_IP1	4	+	94	4	101577986	CDS:1.0;	ENSMUSG00000017119.17	Nbr1	chr11	protein_coding	neighbor of Brca1 gene 1
chr11	77687146	77687383	chr11_21085_IP1	14	+	238	10	77687215	intron:1.0;	ENSMUSG00000037857.14	Nufip2	chr11	protein_coding	nuclear fragile X mental retardation protein interacting protein 2
chr11	34088199	34088339	chr11_19554_IP1	3	+	141	3	34088202	intron:1.0;	ENSMUSG00000002699.10	Lcp2	chr11	protein_coding	lymphocyte cytosolic protein 2
chr11	48113890	48114019	chr11_19795_IP1	3	+	130	3	48113893	intergenic;	--
chr11	102185082	102185282	chr11_26798_IP1	4	-	201	4	102185171	five_prime_UTR:0.38;CDS:0.62;	ENSMUSG00000020922.9	Lsm12	chr11	protein_coding	LSM12 homolog (S. cerevisiae)
chr11	80779807	80779963	chr11_25845_IP1	9	-	157	9	80779856	five_prime_UTR:1.0;	ENSMUSG00000035441.12	Myo1d	chr11	protein_coding	myosin ID
chr11	78973062	78973189	chr11_25783_IP1	4	-	128	4	78973074	CDS:1.0;	ENSMUSG00000001123.13	Lgals9	chr11	protein_coding	lectin, galactose binding, soluble 9
chr11	3144140	3144312	chr11_23282_IP1	4	-	173	4	3144216	CDS:0.44;intron:0.56;	ENSMUSG00000023764.16	Sfi1	chr11	protein_coding	Sfi1 homolog, spindle assembly associated (yeast)
chr11	5070385	5070525	chr11_23409_IP1	10	-	141	10	5070432	CDS:0.68;intron:0.32;	ENSMUSG00000009079.14	Ewsr1	chr11	protein_coding	Ewing sarcoma breakpoint region 1
chr11	101126031	101126157	chr11_22154_IP1	3	+	127	3	101126052	CDS:1.0;	ENSMUSG00000035198.9	Tubg1	chr11	protein_coding	tubulin, gamma 1
chr11	98706378	98706478	chr11_26563_IP1	4	-	101	4	98706378	CDS:1.0;	ENSMUSG00000017210.12	Med24	chr11	protein_coding	mediator complex subunit 24
chr11	104701435	104701596	chr11_22341_IP1	4	+	162	4	104701450	intron:1.0;	ENSMUSG00000040838.9	Gm11639	chr11	protein_coding	predicted gene 11639
chr11	104441788	104441942	chr11_22334_IP1	4	+	155	4	104441821	antisense;	ENSMUSG00000018412.14	Kansl1	chr11	protein_coding	KAT8 regulatory NSL complex subunit 1
chr11	119273974	119274165	chr11_22974_IP1	7	+	192	6	119274042	CDS:0.87;intron:0.13;	ENSMUSG00000025579.12	Gaa	chr11	protein_coding	glucosidase, alpha, acid
chr11	101254840	101255006	chr11_26756_IP1	3	-	167	3	101254860	antisense;	ENSMUSG00000078656.9	Vps25	chr11	protein_coding	vacuolar protein sorting 25 (yeast)
chr11	61187257	61187386	chr11_25012_IP1	3	-	130	3	61187260	intergenic;	--
chr11	49243874	49244051	chr11_19822_IP1	3	+	178	3	49243904	intergenic;	--
chr11	77790544	77790663	chr11_21095_IP1	4	+	120	4	77790558	intron:1.0;	ENSMUSG00000000631.17	Myo18a	chr11	protein_coding	myosin XVIIIA
chr11	113728636	113728769	chr11_27286_IP1	4	-	134	4	113728676	CDS:1.0;	ENSMUSG00000041598.7	Cdc42ep4	chr11	protein_coding	CDC42 effector protein (Rho GTPase binding) 4
chr11	88924568	88924724	chr11_26133_IP1	7	-	157	6	88924615	three_prime_UTR:0.6;CDS:0.4;	ENSMUSG00000000278.10	Scpep1	chr11	protein_coding	serine carboxypeptidase 1
chr11	88047963	88048032	chr11_21526_IP1	8	+	70	8	88048014	CDS:1.0;	ENSMUSG00000018379.15	Srsf1	chr11	protein_coding	serine/arginine-rich splicing factor 1
chr11	105333668	105333731	chr11_22371_IP1	5	+	64	5	105333729	CDS:1.0;	ENSMUSG00000020695.12	Mrc2	chr11	protein_coding	mannose receptor, C type 2
chr11	94991461	94991681	chr11_21736_IP1	8	+	221	8	94991565	five_prime_UTR:0.39;CDS:0.61;	ENSMUSG00000038976.10	Ppp1r9b	chr11	protein_coding	protein phosphatase 1, regulatory subunit 9B
chr11	121259794	121260268	chr11_23246_IP1	14	+	475	8	121260137	five_prime_UTR:0.3;CDS:0.29;intron:0.41;	ENSMUSG00000039275.9	Foxk2	chr11	protein_coding	forkhead box K2
chr11	37918669	37918819	chr11_19616_IP1	3	+	151	3	37918672	intergenic;	--
chr11	98796291	98796382	chr11_26576_IP1	4	-	92	4	98796299	antisense;	ENSMUSG00000052915.12	Msl1	chr11	protein_coding	male-specific lethal 1 homolog (Drosophila)
chr11	116605390	116605605	chr11_27497_IP1	8	-	216	6	116605419	CDS:0.22;intron:0.78;	ENSMUSG00000020806.13	Rhbdf2	chr11	protein_coding	rhomboid 5 homolog 2 (Drosophila)
chr11	72449719	72449833	chr11_20813_IP1	7	+	115	6	72449832	CDS:1.0;	ENSMUSG00000040463.14	Mybbp1a	chr11	protein_coding	MYB binding protein (P160) 1a
chr11	88177269	88177397	chr11_21534_IP1	4	+	129	4	88177285	CDS:1.0;	ENSMUSG00000018378.11	Cuedc1	chr11	protein_coding	CUE domain containing 1
chr11	47613012	47613119	chr11_19788_IP1	3	+	108	3	47613015	intergenic;	--
chr11	5041827	5041960	chr11_18807_IP1	6	+	134	6	5041854	three_prime_UTR:1.0;	ENSMUSG00000009090.15	Ap1b1	chr11	protein_coding	adaptor protein complex AP-1, beta 1 subunit
chr11	72021102	72021334	chr11_20793_IP1	3	+	233	3	72021188	intergenic;	--
chr11	50299128	50299344	chr11_24558_IP1	4	-	217	4	50299233	CDS:1.0;	ENSMUSG00000020368.13	Canx	chr11	protein_coding	calnexin
chr11	68669814	68669985	chr11_25197_IP1	3	-	172	3	68669838	intergenic;	--
chr11	102221936	102222099	chr11_26824_IP1	6	-	164	6	102221964	intron:1.0;	ENSMUSG00000008855.15	Hdac5	chr11	protein_coding	histone deacetylase 5
chr11	16752306	16752550	chr11_19112_IP1	6	+	245	6	16752403	five_prime_UTR:0.72;CDS:0.28;	ENSMUSG00000020122.14	Egfr	chr11	protein_coding	epidermal growth factor receptor
chr11	30930047	30930197	chr11_24122_IP1	3	-	151	3	30930050	intergenic;	--
chr11	117968187	117968515	chr11_27565_IP1	8	-	329	6	117968298	five_prime_UTR:0.27;CDS:0.13;intron:0.6;	ENSMUSG00000053113.3	Socs3	chr11	protein_coding	suppressor of cytokine signaling 3
chr11	120377235	120377469	chr11_27760_IP1	3	-	235	3	120377322	CDS:1.0;	ENSMUSG00000025384.13	2310003H01Rik	chr11	protein_coding		--
chr11	59848143	59848451	chr11_20248_IP1	5	+	309	4	59848319	CDS:0.74;intron:0.26;	ENSMUSG00000032615.12	Nt5m	chr11	protein_coding	5',3'-nucleotidase, mitochondrial
chr11	97187613	97187798	chr11_21842_IP1	13	+	186	11	97187739	antisense;	ENSMUSG00000001440.5	Kpnb1	chr11	protein_coding	karyopherin (importin) beta 1
chr11	34921115	34921325	chr11_19561_IP1	3	+	211	3	34921179	intergenic;	--
chr11	5192382	5192556	chr11_23433_IP1	6	-	175	6	5192427	three_prime_UTR:1.0;	ENSMUSG00000020393.14	Kremen1	chr11	protein_coding	kringle containing transmembrane protein 1
chr11	102290868	102291281	chr11_26832_IP1	12	-	414	6	102291090	three_prime_UTR:1.0;	ENSMUSG00000059995.10	Atxn7l3	chr11	protein_coding	ataxin 7-like 3
chr11	82781425	82781580	chr11_21352_IP1	3	+	156	3	82781433	intron:1.0;	ENSMUSG00000020697.14	Lig3	chr11	protein_coding	ligase III, DNA, ATP-dependent
chr11	94558100	94558334	chr11_26274_IP1	7	-	235	7	94558214	three_prime_UTR:0.88;CDS:0.12;	ENSMUSG00000076435.3	Acsf2	chr11	protein_coding	acyl-CoA synthetase family member 2
chr11	60106300	60106483	chr11_20256_IP1	8	+	184	8	60106359	intron:1.0;	ENSMUSG00000062115.13	Rai1	chr11	protein_coding	retinoic acid induced 1
chr11	6429095	6429225	chr11_23521_IP1	4	-	131	4	6429154	CDS:1.0;	ENSMUSG00000041126.14	H2afv	chr11	protein_coding	H2A histone family, member V
chr11	103386989	103387126	chr11_26984_IP1	4	-	138	4	103386992	CDS:1.0;	ENSMUSG00000034247.9	Plekhm1	chr11	protein_coding	pleckstrin homology domain containing, family M (with RUN domain) member 1
chr11	113652288	113652406	chr11_22606_IP1	4	+	119	4	113652307	CDS:1.0;	ENSMUSG00000018661.15	Cog1	chr11	protein_coding	component of oligomeric golgi complex 1
chr11	6546771	6547015	chr11_18924_IP1	10	+	245	6	6546860	five_prime_UTR:0.46;CDS:0.07;intron:0.47;	ENSMUSG00000000378.13	Ccm2	chr11	protein_coding	cerebral cavernous malformation 2
chr11	70563027	70563111	chr11_25410_IP1	4	-	85	4	70563038	antisense;	ENSMUSG00000020827.16	Mink1	chr11	protein_coding	misshapen-like kinase 1 (zebrafish)
chr11	6016297	6016478	chr11_18875_IP1	3	+	182	3	6016332	antisense;	ENSMUSG00000057897.12	Camk2b	chr11	protein_coding	calcium/calmodulin-dependent protein kinase II, beta
chr11	15744637	15744778	chr11_23745_IP1	3	-	142	3	15744640	intergenic;	--
chr11	113649717	113649852	chr11_22604_IP1	4	+	136	4	113649732	CDS:1.0;	ENSMUSG00000018661.15	Cog1	chr11	protein_coding	component of oligomeric golgi complex 1
chr11	28869562	28869806	chr11_19380_IP1	3	+	245	3	28869659	intron:1.0;	ENSMUSG00000020467.13	Efemp1	chr11	protein_coding	epidermal growth factor-containing fibulin-like extracellular matrix protein 1
chr11	37054121	37054282	chr11_19599_IP1	3	+	162	3	37054136	antisense;	ENSMUSG00000049336.14	Tenm2	chr11	protein_coding	teneurin transmembrane protein 2
chr11	96818414	96818605	chr11_26412_IP1	12	-	192	10	96818425	three_prime_UTR:1.0;	ENSMUSG00000038615.15	Nfe2l1	chr11	protein_coding	nuclear factor, erythroid derived 2,-like 1
chr11	40522848	40522999	chr11_24361_IP1	3	-	152	3	40522852	intergenic;	--
chr11	77836416	77836482	chr11_21119_IP1	4	+	67	4	77836451	CDS:1.0;	ENSMUSG00000000631.17	Myo18a	chr11	protein_coding	myosin XVIIIA
chr11	94992471	94992640	chr11_21740_IP1	9	+	170	9	94992556	CDS:1.0;	ENSMUSG00000038976.10	Ppp1r9b	chr11	protein_coding	protein phosphatase 1, regulatory subunit 9B
chr11	21319759	21319999	chr11_19219_IP1	3	+	241	3	21319852	three_prime_UTR:0.59;CDS:0.41;	ENSMUSG00000020128.13	Vps54	chr11	protein_coding	vacuolar protein sorting 54 (yeast)
chr11	94991058	94991171	chr11_26313_IP1	4	-	114	4	94991116	antisense;	ENSMUSG00000038976.10	Ppp1r9b	chr11	protein_coding	protein phosphatase 1, regulatory subunit 9B
chr11	105338791	105338934	chr11_22376_IP1	5	+	144	5	105338863	CDS:1.0;	ENSMUSG00000020695.12	Mrc2	chr11	protein_coding	mannose receptor, C type 2
chr11	77508558	77508769	chr11_25706_IP1	6	-	212	6	77508623	CDS:1.0;	ENSMUSG00000044328.11	Trp53i13	chr11	protein_coding	transformation related protein 53 inducible protein 13
chr11	59506252	59506400	chr11_20217_IP1	4	+	149	4	59506288	antisense;	ENSMUSG00000020472.12	Zkscan17	chr11	protein_coding	zinc finger with KRAB and SCAN domains 17
chr11	20113195	20113279	chr11_19173_IP1	4	+	85	4	20113212	intergenic;	--
chr11	121329325	121329427	chr11_27949_IP1	3	-	103	3	121329338	CDS:1.0;	ENSMUSG00000025173.11	Wdr45b	chr11	protein_coding	WD repeat domain 45B
chr11	80100351	80100567	chr11_21304_IP1	4	+	217	4	80100423	CDS:0.57;intron:0.43;	ENSMUSG00000017550.12	Atad5	chr11	protein_coding	ATPase family, AAA domain containing 5
chr11	83298811	83299023	chr11_25887_IP1	4	-	213	4	83298923	five_prime_UTR:0.65;intron:0.35;	ENSMUSG00000018733.8	Pex12	chr11	protein_coding	peroxisomal biogenesis factor 12
chr11	97451503	97451715	chr11_21866_IP1	11	+	213	7	97451665	five_prime_UTR:0.11;CDS:0.89;	ENSMUSG00000049807.14	Arhgap23	chr11	protein_coding	Rho GTPase activating protein 23
chr11	58030995	58031139	chr11_20149_IP1	4	+	145	4	58031021	intron:1.0;	ENSMUSG00000037331.13	Larp1	chr11	protein_coding	La ribonucleoprotein domain family, member 1
chr11	4575361	4575513	chr11_18770_IP1	5	+	153	5	4575369	antisense;	ENSMUSG00000034354.15	Mtmr3	chr11	protein_coding	myotubularin related protein 3
chr11	11764762	11764913	chr11_19012_IP1	3	+	152	3	11764766	intron:1.0;	ENSMUSG00000018654.15	Ikzf1	chr11	protein_coding	IKAROS family zinc finger 1
chr11	30777593	30777737	chr11_19438_IP1	4	+	145	4	30777626	intron:1.0;	ENSMUSG00000040850.15	Psme4	chr11	protein_coding	proteasome (prosome, macropain) activator subunit 4
chr11	35876033	35876152	chr11_24246_IP1	4	-	120	4	35876037	CDS:1.0;	ENSMUSG00000018849.6	Wwc1	chr11	protein_coding	WW, C2 and coiled-coil domain containing 1
chr11	78251015	78251109	chr11_21191_IP1	4	+	95	4	78251015	CDS:1.0;	ENSMUSG00000002064.10	Sdf2	chr11	protein_coding	stromal cell derived factor 2
chr11	107796414	107796437	chr11_22504_IP1	3	+	24	3	107796418	intergenic;	--
chr11	8962375	8962556	chr11_23602_IP1	3	-	182	3	8962410	intergenic;	--
chr11	109013092	109013098	chr11_27206_IP1	20	-	7	20	109013092	intergenic;	--
chr11	15343330	15343529	chr11_23731_IP1	4	-	200	4	15343383	intergenic;	--
chr11	59213339	59213523	chr11_24860_IP1	10	-	185	9	59213407	five_prime_UTR:0.2;CDS:0.8;	ENSMUSG00000048076.12	Arf1	chr11	protein_coding	ADP-ribosylation factor 1
chr11	102316928	102317361	chr11_22237_IP1	18	+	434	13	102317214	antisense;	ENSMUSG00000020923.15	Ubtf	chr11	protein_coding	upstream binding transcription factor, RNA polymerase I
chr11	11305406	11305552	chr11_23649_IP1	4	-	147	4	11305416	intron:1.0;	ENSMUSG00000020193.3	Zpbp	chr11	protein_coding	zona pellucida binding protein
chr11	96916175	96916370	chr11_26438_IP1	9	-	196	9	96916223	CDS:0.11;intron:0.89;	ENSMUSG00000018669.12	Cdk5rap3	chr11	protein_coding	CDK5 regulatory subunit associated protein 3
chr11	106085129	106085286	chr11_22424_IP1	4	+	158	4	106085200	intron:1.0;	ENSMUSG00000020700.11	Map3k3	chr11	protein_coding	mitogen-activated protein kinase kinase kinase 3
chr11	48349355	48349547	chr11_19797_IP1	3	+	193	3	48349400	intergenic;	--
chr11	77766576	77766798	chr11_21089_IP1	4	+	223	4	77766704	intron:1.0;	ENSMUSG00000000631.17	Myo18a	chr11	protein_coding	myosin XVIIIA
chr11	109521040	109521180	chr11_27213_IP1	3	-	141	3	109521043	antisense;	ENSMUSG00000020604.11	Arsg	chr11	protein_coding	arylsulfatase G
chr11	90795154	90795401	chr11_26164_IP1	4	-	248	4	90795254	intergenic;	--
chr11	97187373	97187564	chr11_21841_IP1	14	+	192	10	97187469	antisense;	ENSMUSG00000001440.5	Kpnb1	chr11	protein_coding	karyopherin (importin) beta 1
chr11	72449992	72450094	chr11_20814_IP1	7	+	103	7	72449994	CDS:1.0;	ENSMUSG00000040463.14	Mybbp1a	chr11	protein_coding	MYB binding protein (P160) 1a
chr11	93996147	93996362	chr11_26229_IP1	6	-	216	6	93996242	antisense;	ENSMUSG00000020859.14	Spag9	chr11	protein_coding	sperm associated antigen 9
chr11	69970581	69970737	chr11_25379_IP1	5	-	157	5	69970591	CDS:1.0;	ENSMUSG00000018565.15	Elp5	chr11	protein_coding	elongator acetyltransferase complex subunit 5
chr11	23665408	23665501	chr11_23944_IP1	4	-	94	4	23665444	intron:1.0;	ENSMUSG00000020283.5	Pex13	chr11	protein_coding	peroxisomal biogenesis factor 13
chr11	57801610	57801813	chr11_24801_IP1	8	-	204	6	57801700	antisense;	ENSMUSG00000020519.5	Sap30l	chr11	protein_coding	SAP30-like
chr11	35212128	35212224	chr11_19564_IP1	3	+	97	3	35212131	intron:1.0;	ENSMUSG00000056427.8	Slit3	chr11	protein_coding	slit homolog 3 (Drosophila)
chr11	101425394	101425610	chr11_22180_IP1	4	+	217	4	101425514	CDS:1.0;	ENSMUSG00000035007.5	Rundc1	chr11	protein_coding	RUN domain containing 1
chr11	118015451	118015614	chr11_22922_IP1	4	+	164	4	118015490	intron:1.0;	ENSMUSG00000017715.9	Pgs1	chr11	protein_coding	phosphatidylglycerophosphate synthase 1
chr11	79339881	79340040	chr11_25809_IP1	6	-	160	6	79339937	antisense;	ENSMUSG00000020716.13	Nf1	chr11	protein_coding	neurofibromatosis 1
chr11	21371023	21371168	chr11_23873_IP1	4	-	146	4	21371067	five_prime_UTR:1.0;	ENSMUSG00000001891.14	Ugp2	chr11	protein_coding	UDP-glucose pyrophosphorylase 2
chr11	107469682	107469829	chr11_27170_IP1	3	-	148	3	107469718	intron:1.0;	ENSMUSG00000040430.16	Pitpnc1	chr11	protein_coding	phosphatidylinositol transfer protein, cytoplasmic 1
chr11	106781642	106781931	chr11_27129_IP1	6	-	290	6	106781784	three_prime_UTR:0.72;CDS:0.28;	ENSMUSG00000020719.12	Ddx5	chr11	protein_coding	DEAD (Asp-Glu-Ala-Asp) box polypeptide 5
chr11	3358913	3359064	chr11_23301_IP1	4	-	152	4	3358994	CDS:0.46;intron:0.54;	ENSMUSG00000020451.15	Limk2	chr11	protein_coding	LIM motif-containing protein kinase 2
chr11	120467835	120467959	chr11_23159_IP1	4	+	125	4	120467840	intron:1.0;	ENSMUSG00000025793.13	Hgs	chr11	protein_coding	HGF-regulated tyrosine kinase substrate
chr11	91731932	91732058	chr11_21586_IP1	3	+	127	3	91731935	intergenic;	--
chr11	28106720	28107115	chr11_24016_IP1	4	-	396	3	28106968	intergenic;	--
chr11	115699334	115699356	chr11_22695_IP1	4	+	23	4	115699338	antisense;	ENSMUSG00000059923.11	Grb2	chr11	protein_coding	growth factor receptor bound protein 2
chr11	116606044	116606206	chr11_27498_IP1	6	-	163	6	116606107	CDS:0.61;intron:0.39;	ENSMUSG00000020806.13	Rhbdf2	chr11	protein_coding	rhomboid 5 homolog 2 (Drosophila)
chr11	5793935	5794045	chr11_18839_IP1	4	+	111	4	5793992	intron:1.0;	ENSMUSG00000020476.12	Dbnl	chr11	protein_coding	drebrin-like
chr11	54907126	54907280	chr11_20081_IP1	9	+	155	7	54907160	CDS:1.0;	ENSMUSG00000018339.9	Gpx3	chr11	protein_coding	glutathione peroxidase 3
chr11	88348783	88348992	chr11_26073_IP1	4	-	210	4	88348879	CDS:1.0;	ENSMUSG00000069769.11	Msi2	chr11	protein_coding	musashi RNA-binding protein 2
chr11	70704457	70704523	chr11_20746_IP1	6	+	67	6	70704464	CDS:1.0;	ENSMUSG00000020821.15	Kif1c	chr11	protein_coding	kinesin family member 1C
chr11	53537724	53538065	chr11_20019_IP1	11	+	342	8	53537899	CDS:0.56;intron:0.44;	ENSMUSG00000018398.16	2020-09-08	chr11	protein_coding	septin 8
chr11	111620688	111620893	chr11_27251_IP1	3	-	206	3	111620746	intergenic;	--
chr11	98741784	98741970	chr11_22000_IP1	7	+	187	6	98741901	five_prime_UTR:0.86;intron:0.14;	ENSMUSG00000058756.11	Thra	chr11	protein_coding	thyroid hormone receptor alpha
chr11	74858751	74858774	chr11_25560_IP1	3	-	24	3	74858773	CDS:1.0;	ENSMUSG00000038351.12	Sgsm2	chr11	protein_coding	small G protein signaling modulator 2
chr11	85053933	85054049	chr11_25943_IP1	4	-	117	4	85053961	CDS:1.0;	ENSMUSG00000000804.12	Usp32	chr11	protein_coding	ubiquitin specific peptidase 32
chr11	58756803	58756953	chr11_24831_IP1	3	-	151	3	58756806	intergenic;	--
chr11	58060676	58060877	chr11_20164_IP1	6	+	202	5	58060841	three_prime_UTR:1.0;	ENSMUSG00000037331.13	Larp1	chr11	protein_coding	La ribonucleoprotein domain family, member 1
chr11	4492738	4492848	chr11_23380_IP1	4	-	111	4	4492793	CDS:1.0;	ENSMUSG00000034354.15	Mtmr3	chr11	protein_coding	myotubularin related protein 3
chr11	102430524	102430540	chr11_26875_IP1	4	-	17	4	102430535	antisense;	ENSMUSG00000034708.9	Grn	chr11	protein_coding	granulin
chr11	117115217	117115351	chr11_22803_IP1	4	+	135	4	117115248	five_prime_UTR:1.0;	ENSMUSG00000020823.14	Sec14l1	chr11	protein_coding	SEC14-like 1 (S. cerevisiae)
chr11	83490659	83490796	chr11_21377_IP1	4	+	138	4	83490701	intron:1.0;	ENSMUSG00000020680.13	Taf15	chr11	protein_coding	TAF15 RNA polymerase II, TATA box binding protein (TBP)-associated factor
chr11	30197860	30197975	chr11_24105_IP1	4	-	116	4	30197864	intron:1.0;	ENSMUSG00000020315.16	Sptbn1	chr11	protein_coding	spectrin beta, non-erythrocytic 1
chr11	3452068	3452191	chr11_23312_IP1	4	-	124	4	3452076	intron:1.0;	ENSMUSG00000020448.14	Rnf185	chr11	protein_coding	ring finger protein 185
chr11	116533259	116533368	chr11_22777_IP1	4	+	110	4	116533292	five_prime_UTR:1.0;	ENSMUSG00000061878.13	Sphk1	chr11	protein_coding	sphingosine kinase 1
chr11	82970355	82970535	chr11_25881_IP1	4	-	181	4	82970389	intergenic;	--
chr11	48869862	48870100	chr11_24500_IP1	4	-	239	4	48869953	intron:1.0;	ENSMUSG00000046879.6	Irgm1	chr11	protein_coding	immunity-related GTPase family M member 1
chr11	46090570	46090694	chr11_19775_IP1	3	+	125	3	46090573	intron:1.0;	ENSMUSG00000011256.14	Adam19	chr11	protein_coding	a disintegrin and metallopeptidase domain 19 (meltrin beta)
chr11	72889136	72889248	chr11_20835_IP1	6	+	113	6	72889175	CDS:1.0;	ENSMUSG00000055670.11	Zzef1	chr11	protein_coding	zinc finger, ZZ-type with EF hand domain 1
chr11	95006651	95006895	chr11_21747_IP1	13	+	245	13	95006748	three_prime_UTR:1.0;	ENSMUSG00000038976.10	Ppp1r9b	chr11	protein_coding	protein phosphatase 1, regulatory subunit 9B
chr11	10039752	10039932	chr11_23615_IP1	3	-	181	3	10039787	intergenic;	--
chr11	115603564	115603812	chr11_27350_IP1	6	-	249	6	115603689	intron:1.0;	ENSMUSG00000020740.11	Gga3	chr11	protein_coding	golgi associated, gamma adaptin ear containing, ARF binding protein 3
chr11	120624783	120624810	chr11_27823_IP1	4	-	28	4	120624786	CDS:1.0;	ENSMUSG00000025138.12	Sirt7	chr11	protein_coding	sirtuin 7
chr11	10633737	10633994	chr11_23627_IP1	4	-	258	4	10633848	intergenic;	--
chr11	119416481	119416644	chr11_23010_IP1	6	+	164	6	119416553	CDS:1.0;	ENSMUSG00000070327.11	Rnf213	chr11	protein_coding	ring finger protein 213
chr11	113559510	113559549	chr11_27278_IP1	4	-	40	4	113559510	CDS:1.0;	ENSMUSG00000041654.13	Slc39a11	chr11	protein_coding	solute carrier family 39 (metal ion transporter), member 11
chr11	109668479	109668639	chr11_22550_IP1	10	+	161	10	109668494	three_prime_UTR:1.0;	ENSMUSG00000020612.14	Prkar1a	chr11	protein_coding	protein kinase, cAMP dependent regulatory, type I, alpha
chr11	121298620	121298803	chr11_23253_IP1	6	+	184	6	121298660	CDS:1.0;	ENSMUSG00000039275.9	Foxk2	chr11	protein_coding	forkhead box K2
chr11	73048009	73048194	chr11_20846_IP1	4	+	186	4	73048062	CDS:0.39;intron:0.61;	ENSMUSG00000020783.12	1200014J11Rik	chr11	protein_coding	RIKEN cDNA 1200014J11 gene
chr11	42495261	42495515	chr11_24400_IP1	5	-	255	5	42495379	antisense;	ENSMUSG00000007653.10	Gabrb2	chr11	protein_coding	gamma-aminobutyric acid (GABA) A receptor, subunit beta 2
chr11	120437212	120437420	chr11_27772_IP1	6	-	209	6	120437273	intron:1.0;	ENSMUSG00000039703.13	Nploc4	chr11	protein_coding	nuclear protein localization 4 homolog (S. cerevisiae)
chr11	54787412	54787592	chr11_24714_IP1	3	-	181	3	54787445	five_prime_UTR:0.18;intron:0.82;	ENSMUSG00000052298.10	Cdc42se2	chr11	protein_coding	CDC42 small effector 2
chr11	107131402	107131497	chr11_22468_IP1	4	+	96	4	107131414	antisense;	ENSMUSG00000040481.14	Bptf	chr11	protein_coding	bromodomain PHD finger transcription factor
chr11	69022415	69022514	chr11_20541_IP1	4	+	100	4	69022450	CDS:1.0;	ENSMUSG00000020898.16	Ctc1	chr11	protein_coding	CTS telomere maintenance complex component 1
chr11	33513601	33513737	chr11_24207_IP1	3	-	137	3	33513601	five_prime_UTR:0.08;CDS:0.13;intron:0.79;	ENSMUSG00000040594.16	Ranbp17	chr11	protein_coding	RAN binding protein 17
chr11	120348424	120348474	chr11_27755_IP1	7	-	51	7	120348426	five_prime_UTR:1.0;	ENSMUSG00000062825.13	Actg1	chr11	protein_coding	actin, gamma, cytoplasmic 1
chr11	115904344	115904492	chr11_22740_IP1	3	+	149	3	115904345	intron:1.0;	ENSMUSG00000048442.13	Smim5	chr11	protein_coding	small integral membrane protein 5
chr11	120812299	120812450	chr11_27879_IP1	11	-	152	8	120812377	CDS:1.0;	ENSMUSG00000025153.8	Fasn	chr11	protein_coding	fatty acid synthase
chr11	116080520	116080680	chr11_27408_IP1	5	-	161	4	116080550	CDS:0.84;intron:0.16;	ENSMUSG00000034341.15	Wbp2	chr11	protein_coding	WW domain binding protein 2
chr11	27521118	27521341	chr11_24013_IP1	3	-	224	3	27521195	intergenic;	--
chr11	37507963	37508114	chr11_19607_IP1	3	+	152	3	37507967	intergenic;	--
chr11	94537946	94538074	chr11_26271_IP1	3	-	129	3	94537949	intergenic;	--
chr11	102306318	102306459	chr11_26846_IP1	7	-	142	7	102306392	three_prime_UTR:1.0;	ENSMUSG00000020923.15	Ubtf	chr11	protein_coding	upstream binding transcription factor, RNA polymerase I
chr11	120348185	120348413	chr11_23151_IP1	9	+	229	9	120348266	antisense;	ENSMUSG00000062825.13	Actg1	chr11	protein_coding	actin, gamma, cytoplasmic 1
chr11	37539626	37539798	chr11_19608_IP1	4	+	173	4	37539652	intergenic;	--
chr11	41859844	41859984	chr11_19688_IP1	3	+	141	3	41859847	intergenic;	--
chr11	19487813	19487951	chr11_19155_IP1	3	+	139	3	19487816	intergenic;	--
chr11	95021197	95021285	chr11_21750_IP1	7	+	89	7	95021252	CDS:1.0;	ENSMUSG00000047181.10	Samd14	chr11	protein_coding	sterile alpha motif domain containing 14
chr11	94670506	94670769	chr11_26294_IP1	10	-	264	8	94670574	CDS:1.0;	ENSMUSG00000020868.13	Xylt2	chr11	protein_coding	xylosyltransferase II
chr11	88170074	88170174	chr11_21533_IP1	3	+	101	3	88170161	CDS:1.0;	ENSMUSG00000018378.11	Cuedc1	chr11	protein_coding	CUE domain containing 1
chr11	89018699	89018837	chr11_21557_IP1	4	+	139	4	89018716	three_prime_UTR:1.0;	ENSMUSG00000000275.14	Trim25	chr11	protein_coding	tripartite motif-containing 25
chr11	85087176	85087451	chr11_25946_IP1	4	-	276	3	85087331	intron:1.0;	ENSMUSG00000000804.12	Usp32	chr11	protein_coding	ubiquitin specific peptidase 32
chr11	98837266	98837552	chr11_22036_IP1	9	+	287	6	98837300	CDS:1.0;	ENSMUSG00000038020.5	Rapgefl1	chr11	protein_coding	Rap guanine nucleotide exchange factor (GEF)-like 1
chr11	74842645	74842886	chr11_20906_IP1	7	+	242	6	74842671	CDS:1.0;	ENSMUSG00000000282.10	Mnt	chr11	protein_coding	max binding protein
chr11	39879728	39879983	chr11_19655_IP1	4	+	256	4	39879836	intergenic;	--
chr11	117157779	117157855	chr11_27532_IP1	3	-	77	3	117157782	antisense;	ENSMUSG00000020823.14	Sec14l1	chr11	protein_coding	SEC14-like 1 (S. cerevisiae)
chr11	102306065	102306196	chr11_26845_IP1	8	-	132	8	102306084	three_prime_UTR:1.0;	ENSMUSG00000020923.15	Ubtf	chr11	protein_coding	upstream binding transcription factor, RNA polymerase I
chr11	5281078	5281214	chr11_23445_IP1	4	-	137	4	5281088	CDS:1.0;	ENSMUSG00000041961.12	Znrf3	chr11	protein_coding	zinc and ring finger 3
chr11	88073056	88073090	chr11_26065_IP1	4	-	35	4	88073056	antisense;	ENSMUSG00000018377.8	Vezf1	chr11	protein_coding	vascular endothelial zinc finger 1
chr11	101050737	101050898	chr11_22137_IP1	4	+	162	4	101050754	intron:1.0;	ENSMUSG00000019302.14	Atp6v0a1	chr11	protein_coding	ATPase, H+ transporting, lysosomal V0 subunit A1
chr11	109667508	109667697	chr11_22548_IP1	8	+	190	6	109667599	three_prime_UTR:0.5;CDS:0.5;	ENSMUSG00000020612.14	Prkar1a	chr11	protein_coding	protein kinase, cAMP dependent regulatory, type I, alpha
chr11	79704350	79704500	chr11_25819_IP1	6	-	151	6	79704383	intergenic;	--
chr11	97461975	97462152	chr11_21874_IP1	8	+	178	8	97462052	intron:1.0;	ENSMUSG00000049807.14	Arhgap23	chr11	protein_coding	Rho GTPase activating protein 23
chr11	4187114	4187205	chr11_18752_IP1	4	+	92	4	4187132	intron:1.0;	ENSMUSG00000034412.11	Tbc1d10a	chr11	protein_coding	TBC1 domain family, member 10a
chr11	121707729	121707822	chr11_23266_IP1	5	+	94	5	121707729	CDS:1.0;	ENSMUSG00000039208.13	Metrnl	chr11	protein_coding	meteorin, glial cell differentiation regulator-like
chr11	77861389	77861600	chr11_21133_IP1	6	+	212	4	77861444	intron:1.0;	ENSMUSG00000000631.17	Myo18a	chr11	protein_coding	myosin XVIIIA
chr11	5966569	5966675	chr11_18866_IP1	4	+	107	4	5966592	three_prime_UTR:1.0;	ENSMUSG00000002741.9	Ykt6	chr11	protein_coding	YKT6 homolog (S. Cerevisiae)
chr11	108581980	108582230	chr11_27199_IP1	4	-	251	3	108582083	antisense;	ENSMUSG00000020728.15	Cep112	chr11	protein_coding	centrosomal protein 112
chr11	4739875	4739904	chr11_18784_IP1	3	+	30	3	4739875	antisense;	ENSMUSG00000009075.2	Cabp7	chr11	protein_coding	calcium binding protein 7
chr11	120713958	120714053	chr11_23208_IP1	4	+	96	4	120713989	five_prime_UTR:1.0;	ENSMUSG00000025145.11	Lrrc45	chr11	protein_coding	leucine rich repeat containing 45
chr11	70917663	70917718	chr11_20776_IP1	4	+	56	4	70917670	CDS:1.0;	ENSMUSG00000020817.14	Rabep1	chr11	protein_coding	rabaptin, RAB GTPase binding effector protein 1
chr11	47404382	47404611	chr11_19787_IP1	3	+	230	3	47404465	antisense;	ENSMUSG00000020354.13	Sgcd	chr11	protein_coding	sarcoglycan, delta (dystrophin-associated glycoprotein)
chr11	120624876	120625032	chr11_27824_IP1	6	-	157	6	120624885	five_prime_UTR:0.27;CDS:0.62;intron:0.12;	ENSMUSG00000025138.12	Sirt7	chr11	protein_coding	sirtuin 7
chr11	100424547	100424639	chr11_22113_IP1	4	+	93	4	100424565	three_prime_UTR:1.0;	ENSMUSG00000001555.8	Fkbp10	chr11	protein_coding	FK506 binding protein 10
chr11	117266447	117266575	chr11_27535_IP1	4	-	129	4	117266477	antisense;	ENSMUSG00000059248.11	2020-09-09	chr11	protein_coding	septin 9
chr11	86561235	86561306	chr11_21479_IP1	3	+	72	3	86561238	CDS:1.0;	ENSMUSG00000020513.13	Tubd1	chr11	protein_coding	tubulin, delta 1
chr11	35980042	35980100	chr11_19580_IP1	4	+	59	4	35980048	antisense;	ENSMUSG00000018849.6	Wwc1	chr11	protein_coding	WW, C2 and coiled-coil domain containing 1
chr11	109362734	109363174	chr11_22533_IP1	13	+	441	10	109362922	five_prime_UTR:0.33;CDS:0.46;intron:0.22;	ENSMUSG00000020611.12	Gna13	chr11	protein_coding	guanine nucleotide binding protein, alpha 13
chr11	58121342	58121587	chr11_24812_IP1	4	-	246	3	58121495	three_prime_UTR:1.0;	ENSMUSG00000037275.12	Gemin5	chr11	protein_coding	gem (nuclear organelle) associated protein 5
chr11	52167893	52168122	chr11_24633_IP1	5	-	230	5	52167975	intron:1.0;	ENSMUSG00000097219.1	Gm26551	chr11	lincRNA	predicted gene, 26551
chr11	52361667	52361839	chr11_19970_IP1	4	+	173	4	52361692	intron:1.0;	ENSMUSG00000020402.9	Vdac1	chr11	protein_coding	voltage-dependent anion channel 1
chr11	120613640	120613725	chr11_27816_IP1	8	-	86	8	120613650	CDS:1.0;	ENSMUSG00000025137.13	Pcyt2	chr11	protein_coding	phosphate cytidylyltransferase 2, ethanolamine
chr11	19924466	19924618	chr11_19159_IP1	4	+	153	4	19924508	five_prime_UTR:1.0;	ENSMUSG00000045671.15	Spred2	chr11	protein_coding	sprouty-related, EVH1 domain containing 2
chr11	98705543	98705602	chr11_26561_IP1	4	-	60	4	98705574	CDS:1.0;	ENSMUSG00000017210.12	Med24	chr11	protein_coding	mediator complex subunit 24
chr11	115788857	115788970	chr11_22709_IP1	5	+	114	5	115788944	CDS:0.23;intron:0.77;	ENSMUSG00000020747.15	2310067B10Rik	chr11	protein_coding	RIKEN cDNA 2310067B10 gene
chr11	80215750	80215867	chr11_21309_IP1	3	+	118	3	80215753	intron:1.0;	ENSMUSG00000017686.14	Rhot1	chr11	protein_coding	ras homolog gene family, member T1
chr11	30431436	30431591	chr11_24114_IP1	3	-	156	3	30431447	intron:1.0;	ENSMUSG00000040919.11	4930505A04Rik	chr11	protein_coding	RIKEN cDNA 4930505A04 gene
chr11	75445797	75445977	chr11_25596_IP1	4	-	181	4	75445831	CDS:1.0;	ENSMUSG00000045374.16	Wdr81	chr11	protein_coding	WD repeat domain 81
chr11	83336341	83336450	chr11_21370_IP1	4	+	110	4	83336341	CDS:1.0;	ENSMUSG00000035152.12	Ap2b1	chr11	protein_coding	adaptor-related protein complex 2, beta 1 subunit
chr11	19625730	19625950	chr11_23812_IP1	4	-	221	4	19625805	intergenic;	--
chr11	64934863	64935010	chr11_25124_IP1	3	-	148	3	64934864	intergenic;	--
chr11	116439133	116439340	chr11_22773_IP1	3	+	208	3	116439249	intergenic;	--
chr11	60245061	60245147	chr11_24949_IP1	4	-	87	4	60245069	CDS:1.0;	ENSMUSG00000000538.16	Tom1l2	chr11	protein_coding	target of myb1-like 2 (chicken)
chr11	74926118	74926298	chr11_20917_IP1	4	+	181	4	74926159	intron:1.0;	ENSMUSG00000038290.13	Smg6	chr11	protein_coding	Smg-6 homolog, nonsense mediated mRNA decay factor (C. elegans)
chr11	82870978	82871139	chr11_25874_IP1	6	-	162	6	82871012	five_prime_UTR:0.82;intron:0.18;	ENSMUSG00000020696.16	Rffl	chr11	protein_coding	ring finger and FYVE like domain containing protein
chr11	97187229	97188016	chr11_26461_IP1	42	-	788	19	97187665	five_prime_UTR:0.38;CDS:0.13;intron:0.5;	ENSMUSG00000001440.5	Kpnb1	chr11	protein_coding	karyopherin (importin) beta 1
chr11	120091814	120091973	chr11_27709_IP1	5	-	160	5	120091864	CDS:1.0;	ENSMUSG00000025377.12	Enthd2	chr11	protein_coding	ENTH domain containing 2
chr11	69041268	69041341	chr11_25228_IP1	4	-	74	4	69041269	intergenic;	--
chr11	101981637	101981843	chr11_26786_IP1	3	-	207	3	101981771	CDS:1.0;	ENSMUSG00000003518.11	Dusp3	chr11	protein_coding	dual specificity phosphatase 3 (vaccinia virus phosphatase VH1-related)
chr11	100958546	100958760	chr11_22127_IP1	9	+	215	9	100958632	antisense;	ENSMUSG00000004044.9	Ptrf	chr11	protein_coding	polymerase I and transcript release factor
chr11	69652714	69653033	chr11_20605_IP1	8	+	320	7	69652816	three_prime_UTR:1.0;	ENSMUSG00000018765.5	Fxr2	chr11	protein_coding	fragile X mental retardation, autosomal homolog 2
chr11	120721458	120721726	chr11_23212_IP1	7	+	269	5	120721531	five_prime_UTR:0.51;CDS:0.13;intron:0.36;	ENSMUSG00000018012.9	Rac3	chr11	protein_coding	RAS-related C3 botulinum substrate 3
chr11	101906413	101906624	chr11_22221_IP1	4	+	212	4	101906478	intergenic;	--
chr11	30219578	30219772	chr11_24108_IP1	5	-	195	4	30219753	five_prime_UTR:0.24;CDS:0.76;	ENSMUSG00000020315.16	Sptbn1	chr11	protein_coding	spectrin beta, non-erythrocytic 1
chr11	103132751	103132835	chr11_22314_IP1	4	+	85	4	103132754	intergenic;	--
chr11	88068357	88068433	chr11_26064_IP1	6	-	77	6	88068372	antisense;	ENSMUSG00000018377.8	Vezf1	chr11	protein_coding	vascular endothelial zinc finger 1
chr11	69369436	69369624	chr11_20579_IP1	3	+	189	3	69369549	intergenic;	--
chr11	84994385	84994553	chr11_25939_IP1	3	-	169	3	84994406	CDS:1.0;	ENSMUSG00000000804.12	Usp32	chr11	protein_coding	ubiquitin specific peptidase 32
chr11	68385518	68385789	chr11_25188_IP1	8	-	272	6	68385642	CDS:1.0;	ENSMUSG00000020902.10	Ntn1	chr11	protein_coding	netrin 1
chr11	119402545	119402686	chr11_22998_IP1	8	+	142	8	119402640	CDS:1.0;	ENSMUSG00000070327.11	Rnf213	chr11	protein_coding	ring finger protein 213
chr11	120578795	120579089	chr11_27797_IP1	18	-	295	12	120578827	three_prime_UTR:1.0;	ENSMUSG00000025132.11	Arhgdia	chr11	protein_coding	Rho GDP dissociation inhibitor (GDI) alpha
chr11	86683740	86683977	chr11_25987_IP1	6	-	238	4	86683794	five_prime_UTR:0.41;intron:0.59;	ENSMUSG00000018171.7	Vmp1	chr11	protein_coding	vacuole membrane protein 1
chr11	63529608	63529758	chr11_20440_IP1	3	+	151	3	63529609	intergenic;	--
chr11	50602021	50602299	chr11_19898_IP1	13	+	279	9	50602239	five_prime_UTR:0.29;CDS:0.49;intron:0.22;	ENSMUSG00000036545.8	Adamts2	chr11	protein_coding	a disintegrin-like and metallopeptidase (reprolysin type) with thrombospondin type 1 motif, 2
chr11	95962500	95962628	chr11_26372_IP1	4	-	129	4	95962521	three_prime_UTR:1.0;	ENSMUSG00000013415.7	Igf2bp1	chr11	protein_coding	insulin-like growth factor 2 mRNA binding protein 1
chr11	98891572	98891612	chr11_22042_IP1	4	+	41	4	98891601	CDS:1.0;	ENSMUSG00000038013.12	Wipf2	chr11	protein_coding	WAS/WASL interacting protein family, member 2
chr11	112163684	112163892	chr11_22583_IP1	3	+	209	3	112163746	intergenic;	--
chr11	106267459	106267518	chr11_27095_IP1	5	-	60	5	106267517	CDS:1.0;	ENSMUSG00000078619.8	Smarcd2	chr11	protein_coding	SWI/SNF related, matrix associated, actin dependent regulator of chromatin, subfamily d, member 2
chr11	6356276	6356378	chr11_18900_IP1	4	+	103	4	6356300	three_prime_UTR:1.0;	ENSMUSG00000020456.15	Ogdh	chr11	protein_coding	oxoglutarate (alpha-ketoglutarate) dehydrogenase (lipoamide)
chr11	75966617	75966691	chr11_25618_IP1	4	-	75	4	75966642	intergenic;	--
chr11	28492847	28493106	chr11_19370_IP1	3	+	260	3	28492960	antisense;	ENSMUSG00000032878.14	Ccdc85a	chr11	protein_coding	coiled-coil domain containing 85A
chr11	62894121	62894426	chr11_20430_IP1	4	+	306	3	62894284	three_prime_UTR:0.91;CDS:0.09;	ENSMUSG00000014177.8	Tvp23b	chr11	protein_coding	trans-golgi network vesicle protein 23B
chr11	72607255	72607455	chr11_20820_IP1	10	+	201	8	72607329	five_prime_UTR:0.86;intron:0.14;	ENSMUSG00000020794.11	Ube2g1	chr11	protein_coding	ubiquitin-conjugating enzyme E2G 1
chr10	80116089	80116306	chr10_29932_IP1	9	+	218	7	80116188	five_prime_UTR:1.0;	ENSMUSG00000003068.13	Stk11	chr10	protein_coding	serine/threonine kinase 11
chr10	18526527	18526678	chr10_28277_IP1	5	+	152	5	18526558	CDS:1.0;	ENSMUSG00000039835.13	Nhsl1	chr10	protein_coding	NHS-like 1
chr10	76716260	76716307	chr10_33572_IP1	4	-	48	4	76716260	CDS:1.0;	ENSMUSG00000001119.7	Col6a1	chr10	protein_coding	collagen, type VI, alpha 1
chr10	127165670	127165821	chr10_35319_IP1	4	-	152	4	127165691	antisense;	ENSMUSG00000006731.9	B4galnt1	chr10	protein_coding	beta-1,4-N-acetyl-galactosaminyl transferase 1
chr10	88445883	88445967	chr10_30538_IP1	3	+	85	3	88445886	three_prime_UTR:1.0;	ENSMUSG00000035311.14	Gnptab	chr10	protein_coding	N-acetylglucosamine-1-phosphate transferase, alpha and beta subunits
chr10	59616313	59616430	chr10_29253_IP1	4	+	118	4	59616333	CDS:0.73;intron:0.27;	ENSMUSG00000071280.1	Gm10322	chr10	protein_coding	predicted gene 10322
chr10	56331230	56331430	chr10_33040_IP1	3	-	201	3	56331283	intergenic;	--
chr10	29764748	29764950	chr10_28518_IP1	4	+	203	4	29764803	intergenic;	--
chr10	105463815	105464061	chr10_30912_IP1	4	+	247	4	105463914	antisense;	ENSMUSG00000036019.8	Tmtc2	chr10	protein_coding	transmembrane and tetratricopeptide repeat containing 2
chr10	78320738	78320850	chr10_33674_IP1	4	-	113	4	78320748	intron:1.0;	ENSMUSG00000001211.12	Agpat3	chr10	protein_coding	1-acylglycerol-3-phosphate O-acyltransferase 3
chr10	39526221	39526400	chr10_28744_IP1	5	+	180	5	39526253	intron:1.0;	ENSMUSG00000019843.12	Fyn	chr10	protein_coding	Fyn proto-oncogene
chr10	68224950	68225141	chr10_33353_IP1	4	-	192	3	68224981	intron:1.0;	ENSMUSG00000019947.9	Arid5b	chr10	protein_coding	AT rich interactive domain 5B (MRF1-like)
chr10	29583254	29583389	chr10_32357_IP1	3	-	136	3	29583257	intergenic;	--
chr10	128377298	128377509	chr10_31631_IP1	8	+	212	8	128377435	intron:1.0;	ENSMUSG00000014498.7	Ankrd52	chr10	protein_coding	ankyrin repeat domain 52
chr10	77581778	77581927	chr10_29750_IP1	4	+	150	4	77581823	five_prime_UTR:0.29;CDS:0.71;	ENSMUSG00000009291.10	Pttg1ip	chr10	protein_coding	pituitary tumor-transforming 1 interacting protein
chr10	4669617	4669790	chr10_31788_IP1	3	-	174	3	4669644	antisense;	ENSMUSG00000019768.14	Esr1	chr10	protein_coding	estrogen receptor 1 (alpha)
chr10	80417550	80417640	chr10_33929_IP1	8	-	91	8	80417586	CDS:1.0;	ENSMUSG00000020167.12	Tcf3	chr10	protein_coding	transcription factor 3
chr10	81105957	81106179	chr10_30175_IP1	12	+	223	12	81106070	five_prime_UTR:0.85;CDS:0.15;	ENSMUSG00000035027.15	Map2k2	chr10	protein_coding	mitogen-activated protein kinase kinase 2
chr10	19757432	19757671	chr10_32172_IP1	3	-	240	3	19757527	antisense;	ENSMUSG00000020007.3	Il20ra	chr10	protein_coding	interleukin 20 receptor, alpha
chr10	77260573	77260674	chr10_29736_IP1	6	+	102	6	77260576	CDS:1.0;	ENSMUSG00000020260.8	Pofut2	chr10	protein_coding	protein O-fucosyltransferase 2
chr10	90065731	90065950	chr10_34393_IP1	3	-	220	3	90065803	antisense;	ENSMUSG00000058589.12	Anks1b	chr10	protein_coding	ankyrin repeat and sterile alpha motif domain containing 1B
chr10	32155839	32156033	chr10_28563_IP1	3	+	195	3	32155888	antisense;	ENSMUSG00000069670.5	Nkain2	chr10	protein_coding	Na+/K+ transporting ATPase interacting 2
chr10	81108725	81108803	chr10_30177_IP1	6	+	79	6	81108747	CDS:0.72;intron:0.28;	ENSMUSG00000035027.15	Map2k2	chr10	protein_coding	mitogen-activated protein kinase kinase 2
chr10	129289828	129289976	chr10_31723_IP1	3	+	149	3	129289829	intergenic;	--
chr10	78845641	78845853	chr10_29794_IP1	3	+	213	3	78845706	intergenic;	--
chr10	55416418	55416568	chr10_33015_IP1	3	-	151	3	55416421	intergenic;	--
chr10	79758669	79758745	chr10_29839_IP1	4	+	77	4	79758688	antisense;	ENSMUSG00000035890.8	Rnf126	chr10	protein_coding	ring finger protein 126
chr10	86349288	86349499	chr10_30496_IP1	5	+	212	5	86349353	three_prime_UTR:1.0;	ENSMUSG00000020044.11	Timp3	chr10	protein_coding	tissue inhibitor of metalloproteinase 3
chr10	116950260	116950427	chr10_34998_IP1	4	-	168	4	116950305	five_prime_UTR:0.72;intron:0.28;	ENSMUSG00000064181.5	Rab3ip	chr10	protein_coding	RAB3A interacting protein
chr10	77515602	77515738	chr10_33616_IP1	8	-	137	8	77515634	CDS:1.0;	ENSMUSG00000032977.8	Fam207a	chr10	protein_coding	family with sequence similarity 207, member A
chr10	56638158	56638293	chr10_33045_IP1	4	-	136	4	56638161	intergenic;	--
chr10	33950964	33951104	chr10_32494_IP1	4	-	141	4	33950969	intron:1.0;	ENSMUSG00000039531.7	Zufsp	chr10	protein_coding	zinc finger with UFM1-specific peptidase domain
chr10	118868038	118868298	chr10_35052_IP1	28	-	261	24	118868235	CDS:0.57;intron:0.43;	ENSMUSG00000028630.8	Dyrk2	chr10	protein_coding	dual-specificity tyrosine-(Y)-phosphorylation regulated kinase 2
chr10	100487161	100487328	chr10_34613_IP1	6	-	168	6	100487251	five_prime_UTR:1.0;	ENSMUSG00000036676.12	Tmtc3	chr10	protein_coding	transmembrane and tetratricopeptide repeat containing 3
chr10	34154775	34154947	chr10_28619_IP1	3	+	173	3	34154800	antisense;	ENSMUSG00000039497.7	Dse	chr10	protein_coding	dermatan sulfate epimerase
chr10	60301809	60302017	chr10_29312_IP1	12	+	209	11	60301928	three_prime_UTR:1.0;	ENSMUSG00000004207.12	Psap	chr10	protein_coding	prosaposin
chr10	24149331	24149410	chr10_28385_IP1	4	+	80	4	24149356	five_prime_UTR:1.0;	ENSMUSG00000019998.5	Stx7	chr10	protein_coding	syntaxin 7
chr10	103643472	103643727	chr10_30873_IP1	4	+	256	4	103643580	intergenic;	--
chr10	117845448	117845785	chr10_35038_IP1	14	-	338	11	117845704	intron:1.0;	ENSMUSG00000052681.7	Rap1b	chr10	protein_coding	RAS related protein 1b
chr10	39732212	39732432	chr10_32628_IP1	5	-	221	3	39732353	antisense;	ENSMUSG00000019841.13	Rev3l	chr10	protein_coding	REV3-like, catalytic subunit of DNA polymerase zeta RAD54 like (S. cerevisiae)
chr10	75060603	75061081	chr10_29643_IP1	19	+	479	10	75060934	five_prime_UTR:0.27;CDS:0.12;intron:0.61;	ENSMUSG00000009681.9	Bcr	chr10	protein_coding	breakpoint cluster region
chr10	81541874	81542071	chr10_34204_IP1	6	-	198	6	81541924	intron:1.0;	ENSMUSG00000034781.5	Gna11	chr10	protein_coding	guanine nucleotide binding protein, alpha 11
chr10	107986645	107986924	chr10_34804_IP1	3	-	280	3	107986777	intergenic;	--
chr10	81482606	81482747	chr10_34176_IP1	3	-	142	3	81482677	five_prime_UTR:0.73;intron:0.27;	ENSMUSG00000034818.14	Celf5	chr10	protein_coding	CUGBP, Elav-like family member 5
chr10	82897307	82897383	chr10_30400_IP1	4	+	77	4	82897320	three_prime_UTR:1.0;	ENSMUSG00000020250.9	Txnrd1	chr10	protein_coding	thioredoxin reductase 1
chr10	80285277	80285354	chr10_33869_IP1	6	-	78	6	80285326	antisense;	ENSMUSG00000069565.10	Dazap1	chr10	protein_coding	DAZ associated protein 1
chr10	127551626	127551725	chr10_35421_IP1	14	-	100	14	127551668	CDS:0.58;intron:0.42;	ENSMUSG00000040249.13	Lrp1	chr10	protein_coding	low density lipoprotein receptor-related protein 1
chr10	79854829	79855131	chr10_29865_IP1	16	+	303	13	79855012	intron:1.0;	ENSMUSG00000006498.14	Ptbp1	chr10	protein_coding	polypyrimidine tract binding protein 1
chr10	24726782	24726950	chr10_28395_IP1	3	+	169	3	24726803	intergenic;	--
chr10	50713767	50714035	chr10_29051_IP1	4	+	269	4	50713888	intron:1.0;	ENSMUSG00000038774.8	Ascc3	chr10	protein_coding	activating signal cointegrator 1 complex subunit 3
chr10	80950572	80950710	chr10_34045_IP1	4	-	139	4	80950584	three_prime_UTR:1.0;	ENSMUSG00000048240.12	Gng7	chr10	protein_coding	guanine nucleotide binding protein (G protein), gamma 7
chr10	9662616	9662858	chr10_31906_IP1	4	-	243	4	9662731	intron:1.0;	ENSMUSG00000060487.5	Samd5	chr10	protein_coding	sterile alpha motif domain containing 5
chr10	123016277	123016417	chr10_35189_IP1	4	-	141	4	123016282	CDS:1.0;	ENSMUSG00000034602.11	Mon2	chr10	protein_coding	MON2 homolog (yeast)
chr10	16873024	16873231	chr10_28233_IP1	3	+	208	3	16873084	intergenic;	--
chr10	23935635	23935806	chr10_28382_IP1	4	+	172	4	23935660	intergenic;	--
chr10	80666518	80666937	chr10_33985_IP1	23	-	420	10	80666778	three_prime_UTR:1.0;	ENSMUSG00000020190.11	Mknk2	chr10	protein_coding	MAP kinase-interacting serine/threonine kinase 2
chr10	119239423	119239622	chr10_35072_IP1	5	-	200	5	119239498	intron:1.0;	ENSMUSG00000020114.10	Cand1	chr10	protein_coding	cullin associated and neddylation disassociated 1
chr10	119139615	119139755	chr10_35059_IP1	3	-	141	3	119139618	intergenic;	--
chr10	109888323	109888565	chr10_31019_IP1	5	+	243	5	109888421	antisense;	ENSMUSG00000020181.13	Nav3	chr10	protein_coding	neuron navigator 3
chr10	108162059	108162277	chr10_30968_IP1	7	+	219	7	108162137	intergenic;	--
chr10	38810198	38810379	chr10_28726_IP1	4	+	182	4	38810275	intergenic;	--
chr10	94515235	94515397	chr10_30650_IP1	6	+	163	6	94515281	intron:1.0;	ENSMUSG00000020023.15	Tmcc3	chr10	protein_coding	transmembrane and coiled coil domains 3
chr10	127599978	127600129	chr10_31523_IP1	3	+	152	3	127599982	antisense;	ENSMUSG00000040249.13	Lrp1	chr10	protein_coding	low density lipoprotein receptor-related protein 1
chr10	83104253	83104389	chr10_30410_IP1	3	+	137	3	83104256	intron:1.0;	ENSMUSG00000034612.7	Chst11	chr10	protein_coding	carbohydrate sulfotransferase 11
chr10	80079256	80079452	chr10_33832_IP1	7	-	197	5	80079322	intron:1.0;	ENSMUSG00000035673.9	Sbno2	chr10	protein_coding	strawberry notch homolog 2 (Drosophila)
chr10	127526361	127526514	chr10_35393_IP1	4	-	154	4	127526384	CDS:1.0;	ENSMUSG00000040258.6	Nxph4	chr10	protein_coding	neurexophilin 4
chr10	31609042	31609225	chr10_28552_IP1	4	+	184	4	31609103	antisense;	ENSMUSG00000063760.9	Rnf217	chr10	protein_coding	ring finger protein 217
chr10	116938337	116938643	chr10_34996_IP1	5	-	307	3	116938501	intron:1.0;	ENSMUSG00000064181.5	Rab3ip	chr10	protein_coding	RAB3A interacting protein
chr10	26613526	26613726	chr10_32294_IP1	4	-	201	4	26613579	intergenic;	--
chr10	80764587	80764712	chr10_30107_IP1	7	+	126	7	80764601	CDS:0.35;intron:0.65;	ENSMUSG00000061589.12	Dot1l	chr10	protein_coding	DOT1-like, histone H3 methyltransferase (S. cerevisiae)
chr10	24595797	24596046	chr10_28393_IP1	6	+	250	6	24595920	CDS:0.69;intron:0.31;	ENSMUSG00000019997.9	Ctgf	chr10	protein_coding	connective tissue growth factor
chr10	80341881	80342030	chr10_33887_IP1	6	-	150	6	80341917	CDS:0.4;intron:0.6;	ENSMUSG00000043822.16	Adamtsl5	chr10	protein_coding	ADAMTS-like 5
chr10	71285078	71285182	chr10_33399_IP1	4	-	105	4	71285112	five_prime_UTR:0.56;CDS:0.23;intron:0.21;	ENSMUSG00000019927.6	Ube2d1	chr10	protein_coding	ubiquitin-conjugating enzyme E2D 1
chr10	127574266	127574511	chr10_35459_IP1	14	-	246	8	127574266	CDS:1.0;	ENSMUSG00000040249.13	Lrp1	chr10	protein_coding	low density lipoprotein receptor-related protein 1
chr10	80285260	80285391	chr10_30007_IP1	8	+	132	8	80285341	CDS:1.0;	ENSMUSG00000069565.10	Dazap1	chr10	protein_coding	DAZ associated protein 1
chr10	56072676	56072931	chr10_33028_IP1	3	-	256	3	56072785	intron:1.0;	ENSMUSG00000038122.8	Tbc1d32	chr10	protein_coding	TBC1 domain family, member 32
chr10	70189121	70189307	chr10_29545_IP1	18	+	187	18	70189202	three_prime_UTR:0.16;CDS:0.84;	ENSMUSG00000048701.11	Ccdc6	chr10	protein_coding	coiled-coil domain containing 6
chr10	18845048	18845309	chr10_28286_IP1	6	+	262	4	18845135	five_prime_UTR:0.47;CDS:0.45;intron:0.08;	ENSMUSG00000019851.7	Perp	chr10	protein_coding	PERP, TP53 apoptosis effector
chr10	59222490	59222638	chr10_29236_IP1	3	+	149	3	59222492	noncoding_exon:1.0;	ENSMUSG00000107372.1	AC153941.1	chr10	pseudogene		--
chr10	21528064	21528265	chr10_32205_IP1	3	-	202	3	21528119	intergenic;	--
chr10	62269372	62269681	chr10_33218_IP1	6	-	310	4	62269384	three_prime_UTR:1.0;	ENSMUSG00000037012.16	Hk1	chr10	protein_coding	hexokinase 1
chr10	79766813	79766984	chr10_29840_IP1	6	+	172	6	79766840	antisense;	ENSMUSG00000035890.8	Rnf126	chr10	protein_coding	ring finger protein 126
chr10	49433720	49433869	chr10_29010_IP1	3	+	150	3	49433722	antisense;	ENSMUSG00000056073.12	Grik2	chr10	protein_coding	glutamate receptor, ionotropic, kainate 2 (beta 2)
chr10	28074917	28075015	chr10_32315_IP1	4	-	99	4	28074929	antisense;	ENSMUSG00000019889.9	Ptprk	chr10	protein_coding	protein tyrosine phosphatase, receptor type, K
chr10	80931948	80932108	chr10_30162_IP1	4	+	161	4	80932000	three_prime_UTR:1.0;	ENSMUSG00000015312.8	Gadd45b	chr10	protein_coding	growth arrest and DNA-damage-inducible 45 beta
chr10	16455223	16455428	chr10_32091_IP1	4	-	206	4	16455281	intergenic;	--
chr10	80058415	80058458	chr10_33812_IP1	6	-	44	6	80058415	CDS:1.0;	ENSMUSG00000035673.9	Sbno2	chr10	protein_coding	strawberry notch homolog 2 (Drosophila)
chr10	77000188	77000401	chr10_29726_IP1	3	+	214	3	77000254	intergenic;	--
chr10	128993578	128993732	chr10_31714_IP1	3	+	155	3	128993585	intergenic;	--
chr10	99107524	99107680	chr10_30757_IP1	5	+	157	5	99107544	intron:1.0;	ENSMUSG00000019952.12	Poc1b	chr10	protein_coding	POC1 centriolar protein homolog B (Chlamydomonas)
chr10	127095854	127096001	chr10_35304_IP1	5	-	148	5	127095903	three_prime_UTR:1.0;	ENSMUSG00000040462.10	Os9	chr10	protein_coding	amplified in osteosarcoma
chr10	27038030	27038157	chr10_28453_IP1	3	+	128	3	27038033	antisense;	ENSMUSG00000019899.13	Lama2	chr10	protein_coding	laminin, alpha 2
chr10	53043815	53043987	chr10_32956_IP1	3	-	173	3	53043841	antisense;	ENSMUSG00000038602.7	Slc35f1	chr10	protein_coding	solute carrier family 35, member F1
chr10	80138907	80139111	chr10_33852_IP1	4	-	205	4	80138964	five_prime_UTR:0.13;intron:0.87;	ENSMUSG00000035640.16	Dos	chr10	protein_coding	downstream of Stk11
chr10	98914173	98914417	chr10_34585_IP1	5	-	245	4	98914325	intergenic;	--
chr10	128409735	128409839	chr10_35548_IP1	4	-	105	4	128409788	five_prime_UTR:1.0;	ENSMUSG00000025374.11	Nabp2	chr10	protein_coding	nucleic acid binding protein 2
chr10	80011738	80011838	chr10_29920_IP1	4	+	101	4	80011742	CDS:1.0;	ENSMUSG00000035722.13	Abca7	chr10	protein_coding	ATP-binding cassette, sub-family A (ABC1), member 7
chr10	80755546	80755697	chr10_30106_IP1	6	+	152	6	80755601	intron:1.0;	ENSMUSG00000061589.12	Dot1l	chr10	protein_coding	DOT1-like, histone H3 methyltransferase (S. cerevisiae)
chr10	47261411	47261621	chr10_32804_IP1	3	-	211	3	47261477	intergenic;	--
chr10	80717758	80717930	chr10_34014_IP1	6	-	173	6	80717864	CDS:1.0;	ENSMUSG00000020198.7	Ap3d1	chr10	protein_coding	adaptor-related protein complex 3, delta 1 subunit
chr10	33342712	33342930	chr10_32470_IP1	3	-	219	3	33342783	antisense;	ENSMUSG00000019787.8	Trdn	chr10	protein_coding	triadin
chr10	128459029	128459323	chr10_31668_IP1	4	+	295	3	128459222	five_prime_UTR:0.3;intron:0.7;	ENSMUSG00000025369.12	Smarcc2	chr10	protein_coding	SWI/SNF related, matrix associated, actin dependent regulator of chromatin, subfamily c, member 2
chr10	105680994	105681172	chr10_30914_IP1	3	+	179	3	105681027	intergenic;	--
chr10	20148817	20148981	chr10_28307_IP1	9	+	165	9	20148854	five_prime_UTR:1.0;	ENSMUSG00000019996.14	Map7	chr10	protein_coding	microtubule-associated protein 7
chr10	81398107	81398306	chr10_34141_IP1	8	-	200	8	81398231	three_prime_UTR:1.0;	ENSMUSG00000055053.15	Nfic	chr10	protein_coding	nuclear factor I/C
chr10	118868936	118869155	chr10_31252_IP1	6	+	220	6	118869040	intergenic;	--
chr10	79046474	79046690	chr10_33713_IP1	3	-	217	3	79046543	intergenic;	--
chr10	79227845	79227979	chr10_29803_IP1	4	+	135	4	79227848	intergenic;	--
chr10	84440270	84440538	chr10_34287_IP1	6	-	269	5	84440438	five_prime_UTR:0.68;CDS:0.32;	ENSMUSG00000020032.12	Nuak1	chr10	protein_coding	NUAK family, SNF1-like kinase, 1
chr10	53379301	53379482	chr10_32965_IP1	3	-	182	3	53379336	intron:1.0;	ENSMUSG00000038594.8	Cep85l	chr10	protein_coding	centrosomal protein 85-like
chr10	98914986	98915323	chr10_30749_IP1	26	+	338	23	98915185	five_prime_UTR:0.51;intron:0.49;	ENSMUSG00000019943.9	Atp2b1	chr10	protein_coding	ATPase, Ca++ transporting, plasma membrane 1
chr10	98205572	98205728	chr10_34574_IP1	3	-	157	3	98205585	intergenic;	--
chr10	42183495	42183651	chr10_32682_IP1	4	-	157	4	42183504	three_prime_UTR:1.0;	ENSMUSG00000048756.9	Foxo3	chr10	protein_coding	forkhead box O3
chr10	86338372	86338455	chr10_30490_IP1	4	+	84	4	86338372	CDS:1.0;	ENSMUSG00000020044.11	Timp3	chr10	protein_coding	tissue inhibitor of metalloproteinase 3
chr10	42929209	42929363	chr10_28835_IP1	4	+	155	4	42929217	intron:1.0;	ENSMUSG00000044770.12	Scml4	chr10	protein_coding	sex comb on midleg-like 4 (Drosophila)
chr10	81246134	81246161	chr10_34100_IP1	4	-	28	4	81246140	antisense;	ENSMUSG00000034949.16	Zfr2	chr10	protein_coding	zinc finger RNA binding protein 2
chr10	93589538	93589621	chr10_30634_IP1	6	+	84	6	93589568	CDS:1.0;	ENSMUSG00000097407.1	4933408J17Rik	chr10	protein_coding	RIKEN cDNA 4933408J17 gene
chr10	61695827	61696010	chr10_29360_IP1	6	+	184	6	61695863	CDS:1.0;	ENSMUSG00000020087.4	Tysnd1	chr10	protein_coding	trypsin domain containing 1
chr10	80783545	80783655	chr10_30115_IP1	6	+	111	6	80783625	CDS:1.0;	ENSMUSG00000061589.12	Dot1l	chr10	protein_coding	DOT1-like, histone H3 methyltransferase (S. cerevisiae)
chr10	79716617	79716816	chr10_29837_IP1	4	+	200	4	79716669	five_prime_UTR:0.18;CDS:0.74;intron:0.08;	ENSMUSG00000020331.7	Hcn2	chr10	protein_coding	hyperpolarization-activated, cyclic nucleotide-gated K+ 2
chr10	97058811	97058944	chr10_34552_IP1	3	-	134	3	97058814	intergenic;	--
chr10	128376786	128377249	chr10_31630_IP1	13	+	464	6	128377136	five_prime_UTR:0.22;CDS:0.06;intron:0.72;	ENSMUSG00000014498.7	Ankrd52	chr10	protein_coding	ankyrin repeat domain 52
chr10	80314925	80315155	chr10_30032_IP1	6	+	231	5	80314963	CDS:1.0;	ENSMUSG00000020135.11	Apc2	chr10	protein_coding	adenomatosis polyposis coli 2
chr10	79793499	79793730	chr10_33764_IP1	4	-	232	4	79793622	antisense;	ENSMUSG00000035863.11	Palm	chr10	protein_coding	paralemmin
chr10	95940580	95940882	chr10_30678_IP1	8	+	303	7	95940775	five_prime_UTR:0.73;intron:0.27;	ENSMUSG00000036499.8	Eea1	chr10	protein_coding	early endosome antigen 1
chr10	81070133	81070278	chr10_30168_IP1	6	+	146	6	81070210	five_prime_UTR:0.89;CDS:0.11;	ENSMUSG00000004929.10	Thop1	chr10	protein_coding	thimet oligopeptidase 1
chr10	127526715	127526844	chr10_35394_IP1	4	-	130	4	127526735	CDS:1.0;	ENSMUSG00000040258.6	Nxph4	chr10	protein_coding	neurexophilin 4
chr10	76961747	76961879	chr10_33590_IP1	3	-	133	3	76961747	five_prime_UTR:0.31;intron:0.69;	ENSMUSG00000001120.13	Pcbp3	chr10	protein_coding	poly(rC) binding protein 3
chr10	88360537	88360706	chr10_30533_IP1	4	+	170	4	88360563	intergenic;	--
chr10	63504507	63504655	chr10_29400_IP1	3	+	149	3	63504508	intron:1.0;	ENSMUSG00000060843.9	Ctnna3	chr10	protein_coding	catenin (cadherin associated protein), alpha 3
chr10	21408608	21408809	chr10_28348_IP1	3	+	202	3	21408663	intergenic;	--
chr10	46205102	46205329	chr10_32778_IP1	3	-	228	3	46205183	intergenic;	--
chr10	28580707	28580968	chr10_28483_IP1	3	+	262	3	28580822	intron:1.0;	ENSMUSG00000019889.9	Ptprk	chr10	protein_coding	protein tyrosine phosphatase, receptor type, K
chr10	61221857	61221915	chr10_33167_IP1	4	-	59	4	61221857	CDS:1.0;	ENSMUSG00000059901.10	Adamts14	chr10	protein_coding	a disintegrin-like and metallopeptidase (reprolysin type) with thrombospondin type 1 motif, 14
chr10	6661561	6661740	chr10_31830_IP1	3	-	180	3	6661594	intergenic;	--
chr10	80146011	80146183	chr10_29950_IP1	4	+	173	4	80146049	intergenic;	--
chr10	73736499	73736629	chr10_29611_IP1	3	+	131	3	73736502	intergenic;	--
chr10	60302244	60302539	chr10_29314_IP1	14	+	296	11	60302359	three_prime_UTR:1.0;	ENSMUSG00000004207.12	Psap	chr10	protein_coding	prosaposin
chr10	118868523	118868757	chr10_35053_IP1	18	-	235	16	118868720	CDS:0.16;intron:0.84;	ENSMUSG00000028630.8	Dyrk2	chr10	protein_coding	dual-specificity tyrosine-(Y)-phosphorylation regulated kinase 2
chr10	81246589	81246616	chr10_34101_IP1	4	-	28	4	81246589	antisense;	ENSMUSG00000034949.16	Zfr2	chr10	protein_coding	zinc finger RNA binding protein 2
chr10	26280143	26280292	chr10_32287_IP1	4	-	150	4	26280168	CDS:1.0;	ENSMUSG00000039089.12	L3mbtl3	chr10	protein_coding	l(3)mbt-like 3 (Drosophila)
chr10	80801176	80801334	chr10_30137_IP1	6	+	159	6	80801260	five_prime_UTR:0.23;CDS:0.65;intron:0.12;	ENSMUSG00000020211.13	Sf3a2	chr10	protein_coding	splicing factor 3a, subunit 2
chr10	18055681	18055800	chr10_32145_IP1	6	-	120	6	18055728	intergenic;	--
chr10	67096531	67096747	chr10_33326_IP1	9	-	217	7	67096601	intron:1.0;	ENSMUSG00000019873.7	Reep3	chr10	protein_coding	receptor accessory protein 3
chr10	91380532	91380670	chr10_30597_IP1	3	+	139	3	91380535	intergenic;	--
chr10	33612494	33612631	chr10_28605_IP1	3	+	138	3	33612497	antisense;	ENSMUSG00000019785.11	Clvs2	chr10	protein_coding	clavesin 2
chr10	4856905	4857011	chr10_28003_IP1	3	+	107	3	4856908	CDS:1.0;	ENSMUSG00000019768.14	Esr1	chr10	protein_coding	estrogen receptor 1 (alpha)
chr10	35412869	35413091	chr10_32538_IP1	3	-	223	3	35412954	intergenic;	--
chr10	54076061	54076208	chr10_29121_IP1	4	+	148	4	54076134	noncoding_exon:1.0;	ENSMUSG00000097069.1	Gm16998	chr10	lincRNA	predicted gene, 16998
chr10	80622704	80623020	chr10_30081_IP1	10	+	317	7	80622812	five_prime_UTR:0.54;intron:0.46;	ENSMUSG00000003345.13	Csnk1g2	chr10	protein_coding	casein kinase 1, gamma 2
chr10	110745534	110745653	chr10_31037_IP1	4	+	120	4	110745554	five_prime_UTR:1.0;	ENSMUSG00000020185.14	E2f7	chr10	protein_coding	E2F transcription factor 7
chr10	34517159	34517383	chr10_28632_IP1	3	+	225	3	34517236	intron:1.0;	ENSMUSG00000019779.12	Frk	chr10	protein_coding	fyn-related kinase
chr10	7955450	7955744	chr10_31874_IP1	9	-	295	6	7955617	intron:1.0;	ENSMUSG00000015755.14	Tab2	chr10	protein_coding	TGF-beta activated kinase 1/MAP3K7 binding protein 2
chr10	107447907	107448135	chr10_34793_IP1	4	-	229	4	107447989	intergenic;	--
chr10	40213881	40214035	chr10_32637_IP1	3	-	155	3	40213888	intergenic;	--
chr10	78009598	78009761	chr10_33637_IP1	6	-	164	6	78009673	five_prime_UTR:0.48;CDS:0.52;	ENSMUSG00000020277.9	Pfkl	chr10	protein_coding	phosphofructokinase, liver, B-type
chr10	80315284	80315515	chr10_30033_IP1	6	+	232	6	80315373	CDS:1.0;	ENSMUSG00000020135.11	Apc2	chr10	protein_coding	adenomatosis polyposis coli 2
chr10	51981291	51981678	chr10_32939_IP1	4	-	388	3	51981531	intergenic;	--
chr10	53489582	53489753	chr10_29114_IP1	3	+	172	3	53489607	intergenic;	--
chr10	12637602	12637825	chr10_28136_IP1	3	+	224	3	12637677	antisense;	ENSMUSG00000019820.9	Utrn	chr10	protein_coding	utrophin
chr10	86685634	86685890	chr10_30502_IP1	6	+	257	3	86685679	noncoding_exon:0.45;intron:0.55;	ENSMUSG00000097412.1	1810014B01Rik	chr10	lincRNA	RIKEN cDNA 1810014B01 gene
chr10	116496657	116496814	chr10_34978_IP1	4	-	158	4	116496681	intron:1.0;	ENSMUSG00000020166.12	Cnot2	chr10	protein_coding	CCR4-NOT transcription complex, subunit 2
chr10	34081547	34081777	chr10_32501_IP1	3	-	231	3	34081631	antisense;	ENSMUSG00000071340.1	Trappc3l	chr10	protein_coding	trafficking protein particle complex 3 like
chr10	78586947	78587064	chr10_33700_IP1	4	-	118	4	78586958	CDS:0.91;intron:0.09;	ENSMUSG00000032714.6	Syde1	chr10	protein_coding	synapse defective 1, Rho GTPase, homolog 1 (C. elegans)
chr10	12520185	12520444	chr10_31978_IP1	4	-	260	4	12520297	intron:1.0;	ENSMUSG00000019820.9	Utrn	chr10	protein_coding	utrophin
chr10	122985716	122985967	chr10_35184_IP1	19	-	252	19	122985820	noncoding_exon:0.03;intron:0.97;	ENSMUSG00000065406.3	Mirlet7i	chr10	miRNA	microRNA let7i
chr10	47871977	47872294	chr10_28955_IP1	4	+	318	3	47872051	intergenic;	--
chr10	46664198	46664399	chr10_28925_IP1	4	+	202	3	46664268	intergenic;	--
chr10	96617021	96617402	chr10_30694_IP1	29	+	382	17	96617258	five_prime_UTR:0.8;CDS:0.2;	ENSMUSG00000036478.7	Btg1	chr10	protein_coding	B cell translocation gene 1, anti-proliferative
chr10	127550970	127551061	chr10_35420_IP1	12	-	92	12	127551019	CDS:1.0;	ENSMUSG00000040249.13	Lrp1	chr10	protein_coding	low density lipoprotein receptor-related protein 1
chr10	33556540	33556682	chr10_32482_IP1	3	-	143	3	33556543	intron:1.0;	ENSMUSG00000019785.11	Clvs2	chr10	protein_coding	clavesin 2
chr10	128232294	128232419	chr10_31597_IP1	4	+	126	4	128232350	intron:1.0;	ENSMUSG00000039994.13	Timeless	chr10	protein_coding	timeless circadian clock 1
chr10	26375356	26375497	chr10_32290_IP1	3	-	142	3	26375408	intergenic;	--
chr10	101591664	101591916	chr10_34645_IP1	3	-	253	3	101591770	intergenic;	--
chr10	38195332	38195559	chr10_32606_IP1	3	-	228	3	38195413	intergenic;	--
chr10	48773465	48773695	chr10_32849_IP1	3	-	231	3	48773551	intergenic;	--
chr10	59761221	59761393	chr10_33105_IP1	3	-	173	3	59761247	antisense;	ENSMUSG00000020111.13	Micu1	chr10	protein_coding	mitochondrial calcium uptake 1
chr10	28904096	28904390	chr10_32340_IP1	4	-	295	3	28904105	intron:1.0;	ENSMUSG00000090126.1	4930519F09Rik	chr10	transcribed_processed_pseudogene	RIKEN cDNA 4930519F09 gene
chr10	110827545	110827775	chr10_34870_IP1	3	-	231	3	110827628	intron:1.0;	ENSMUSG00000101801.4	1700020G17Rik	chr10	antisense	RIKEN cDNA 1700020G17 gene
chr10	81396736	81397046	chr10_34139_IP1	10	-	311	9	81396934	three_prime_UTR:1.0;	ENSMUSG00000055053.15	Nfic	chr10	protein_coding	nuclear factor I/C
chr10	129295803	129296118	chr10_31725_IP1	4	+	316	3	129295903	intergenic;	--
chr10	9900547	9900664	chr10_31919_IP1	4	-	118	4	9900575	CDS:1.0;	ENSMUSG00000019790.14	Stxbp5	chr10	protein_coding	syntaxin binding protein 5 (tomosyn)
chr10	127166050	127166181	chr10_31442_IP1	6	+	132	6	127166114	CDS:1.0;	ENSMUSG00000006731.9	B4galnt1	chr10	protein_coding	beta-1,4-N-acetyl-galactosaminyl transferase 1
chr10	81233176	81233362	chr10_30244_IP1	7	+	187	7	81233215	five_prime_UTR:0.07;CDS:0.28;intron:0.65;	ENSMUSG00000034949.16	Zfr2	chr10	protein_coding	zinc finger RNA binding protein 2
chr10	104736227	104736432	chr10_34737_IP1	3	-	206	3	104736285	intergenic;	--
chr10	82499343	82499456	chr10_34231_IP1	3	-	114	3	82499346	intergenic;	--
chr10	80707130	80707282	chr10_34002_IP1	6	-	153	6	80707156	three_prime_UTR:1.0;	ENSMUSG00000020198.7	Ap3d1	chr10	protein_coding	adaptor-related protein complex 3, delta 1 subunit
chr10	80282715	80282820	chr10_30001_IP1	6	+	106	6	80282772	intron:1.0;	ENSMUSG00000069565.10	Dazap1	chr10	protein_coding	DAZ associated protein 1
chr10	46453917	46454123	chr10_28918_IP1	4	+	207	4	46453978	intergenic;	--
chr10	126997683	126997844	chr10_31416_IP1	10	+	162	8	126997736	three_prime_UTR:1.0;	ENSMUSG00000078429.6	Ctdsp2	chr10	protein_coding	CTD (carboxy-terminal domain, RNA polymerase II, polypeptide A) small phosphatase 2
chr10	122986172	122986528	chr10_35185_IP1	9	-	357	6	122986305	intergenic;	--
chr10	73560870	73561068	chr10_29608_IP1	3	+	199	3	73560921	intergenic;	--
chr10	55310202	55310348	chr10_29143_IP1	3	+	147	3	55310205	intergenic;	--
chr10	44268424	44268584	chr10_28873_IP1	3	+	161	3	44268454	five_prime_UTR:1.0;	ENSMUSG00000038160.6	Atg5	chr10	protein_coding	autophagy related 5
chr10	4356496	4356594	chr10_27989_IP1	4	+	99	4	4356501	CDS:1.0;	ENSMUSG00000038587.8	Akap12	chr10	protein_coding	A kinase (PRKA) anchor protein (gravin) 12
chr10	83504731	83504811	chr10_34267_IP1	4	-	81	4	83504735	intron:1.0;	ENSMUSG00000020256.12	Aldh1l2	chr10	protein_coding	aldehyde dehydrogenase 1 family, member L2
chr10	51953464	51953618	chr10_32938_IP1	4	-	155	4	51953472	intergenic;	--
chr10	83193515	83193661	chr10_30415_IP1	3	+	147	3	83193518	three_prime_UTR:1.0;	ENSMUSG00000034612.7	Chst11	chr10	protein_coding	carbohydrate sulfotransferase 11
chr10	91910596	91910863	chr10_30606_IP1	3	+	268	3	91910716	intergenic;	--
chr10	129738790	129738954	chr10_31744_IP1	4	+	165	4	129738809	antisense;	ENSMUSG00000071065.3	Olfr806	chr10	protein_coding	olfactory receptor 806
chr10	80381490	80381722	chr10_33897_IP1	9	-	233	7	80381640	CDS:1.0;	ENSMUSG00000048696.10	Mex3d	chr10	protein_coding	mex3 homolog D (C. elegans)
chr10	104987740	104987889	chr10_34739_IP1	4	-	150	4	104987743	intergenic;	--
chr10	51545057	51545295	chr10_32931_IP1	3	-	239	3	51545149	intergenic;	--
chr10	81246046	81246161	chr10_30251_IP1	6	+	116	6	81246076	CDS:1.0;	ENSMUSG00000034949.16	Zfr2	chr10	protein_coding	zinc finger RNA binding protein 2
chr10	78439581	78439684	chr10_33691_IP1	4	-	104	4	78439592	three_prime_UTR:1.0;	ENSMUSG00000032788.12	Pdxk	chr10	protein_coding	pyridoxal (pyridoxine, vitamin B6) kinase
chr10	126979705	126979921	chr10_31406_IP1	11	+	217	10	126979835	intron:1.0;	ENSMUSG00000078429.6	Ctdsp2	chr10	protein_coding	CTD (carboxy-terminal domain, RNA polymerase II, polypeptide A) small phosphatase 2
chr10	128487933	128488017	chr10_31681_IP1	10	+	85	9	128487995	CDS:1.0;	ENSMUSG00000025369.12	Smarcc2	chr10	protein_coding	SWI/SNF related, matrix associated, actin dependent regulator of chromatin, subfamily c, member 2
chr10	117054042	117054139	chr10_34999_IP1	4	-	98	4	117054060	CDS:1.0;	ENSMUSG00000034024.7	Cct2	chr10	protein_coding	chaperonin containing Tcp1, subunit 2 (beta)
chr10	128558763	128558971	chr10_35583_IP1	8	-	209	8	128558880	three_prime_UTR:0.68;CDS:0.32;	ENSMUSG00000025364.10	Pa2g4	chr10	protein_coding	proliferation-associated 2G4
chr10	21342600	21342854	chr10_28341_IP1	3	+	255	3	21342708	intron:1.0;	ENSMUSG00000019977.13	Hbs1l	chr10	protein_coding	Hbs1-like (S. cerevisiae)
chr10	76317866	76318017	chr10_33531_IP1	4	-	152	4	76317876	CDS:1.0;	ENSMUSG00000020231.13	Dip2a	chr10	protein_coding	DIP2 disco-interacting protein 2 homolog A (Drosophila)
chr10	80129685	80129719	chr10_33846_IP1	3	-	35	3	80129688	antisense;	ENSMUSG00000003068.13	Stk11	chr10	protein_coding	serine/threonine kinase 11
chr10	80068253	80068426	chr10_33820_IP1	5	-	174	5	80068312	CDS:0.57;intron:0.43;	ENSMUSG00000035673.9	Sbno2	chr10	protein_coding	strawberry notch homolog 2 (Drosophila)
chr10	60686892	60687054	chr10_33124_IP1	4	-	163	4	60686938	five_prime_UTR:1.0;	ENSMUSG00000012819.13	Cdh23	chr10	protein_coding	cadherin 23 (otocadherin)
chr10	55334936	55335143	chr10_29144_IP1	3	+	208	3	55334996	intergenic;	--
chr10	47821683	47821982	chr10_32826_IP1	4	-	300	3	47821727	intergenic;	--
chr10	21345088	21345194	chr10_28342_IP1	3	+	107	3	21345189	CDS:1.0;	ENSMUSG00000019977.13	Hbs1l	chr10	protein_coding	Hbs1-like (S. cerevisiae)
chr10	81312918	81313069	chr10_30280_IP1	9	+	152	7	81313033	CDS:1.0;	ENSMUSG00000034902.15	Pip5k1c	chr10	protein_coding	phosphatidylinositol-4-phosphate 5-kinase, type 1 gamma
chr10	59104186	59104355	chr10_29232_IP1	4	+	170	4	59104286	CDS:1.0;	ENSMUSG00000037990.16	Sh3rf3	chr10	protein_coding	SH3 domain containing ring finger 3
chr10	63023502	63023638	chr10_33257_IP1	4	-	137	4	63023512	intron:1.0;	ENSMUSG00000020069.14	Hnrnph3	chr10	protein_coding	heterogeneous nuclear ribonucleoprotein H3
chr10	59549122	59549248	chr10_33098_IP1	6	-	127	6	59549158	intron:1.0;	ENSMUSG00000009647.11	Mcu	chr10	protein_coding	mitochondrial calcium uniporter
chr10	42762263	42762408	chr10_28825_IP1	4	+	146	4	42762297	intron:1.0;	ENSMUSG00000019802.11	Sec63	chr10	protein_coding	SEC63-like (S. cerevisiae)
chr10	123203166	123203319	chr10_31328_IP1	3	+	154	3	123203172	intergenic;	--
chr10	104093555	104093716	chr10_34713_IP1	3	-	162	3	104093570	intergenic;	--
chr10	16803016	16803175	chr10_28229_IP1	4	+	160	4	16803049	intergenic;	--
chr10	54877773	54877991	chr10_33001_IP1	3	-	219	3	54877844	intergenic;	--
chr10	80274006	80274047	chr10_29986_IP1	7	+	42	7	80274006	CDS:1.0;	ENSMUSG00000069565.10	Dazap1	chr10	protein_coding	DAZ associated protein 1
chr10	66320530	66320684	chr10_33314_IP1	3	-	155	3	66320537	intergenic;	--
chr10	80156459	80156678	chr10_29959_IP1	8	+	220	8	80156542	three_prime_UTR:0.16;CDS:0.84;	ENSMUSG00000035621.11	Midn	chr10	protein_coding	midnolin
chr10	122986153	122986313	chr10_31321_IP1	3	+	161	3	122986249	intergenic;	--
chr10	80786202	80786266	chr10_30120_IP1	6	+	65	6	80786212	CDS:1.0;	ENSMUSG00000061589.12	Dot1l	chr10	protein_coding	DOT1-like, histone H3 methyltransferase (S. cerevisiae)
chr10	83186528	83186787	chr10_34250_IP1	3	-	260	3	83186644	antisense;	ENSMUSG00000034612.7	Chst11	chr10	protein_coding	carbohydrate sulfotransferase 11
chr10	5546663	5546890	chr10_31809_IP1	4	-	228	4	5546743	intron:1.0;	ENSMUSG00000096054.2	Syne1	chr10	protein_coding	spectrin repeat containing, nuclear envelope 1
chr10	94025496	94025654	chr10_34494_IP1	3	-	159	3	94025507	intron:1.0;	ENSMUSG00000036099.14	Vezt	chr10	protein_coding	vezatin, adherens junctions transmembrane protein
chr10	96858928	96859170	chr10_34547_IP1	4	-	243	4	96859024	intergenic;	--
chr10	35500222	35500518	chr10_32541_IP1	4	-	297	3	35500366	intergenic;	--
chr10	80821910	80822042	chr10_30143_IP1	4	+	133	4	80821924	intergenic;	--
chr10	56055689	56055821	chr10_29162_IP1	3	+	133	3	56055692	antisense;	ENSMUSG00000038122.8	Tbc1d32	chr10	protein_coding	TBC1 domain family, member 32
chr10	13008541	13008689	chr10_28148_IP1	4	+	149	4	13008581	five_prime_UTR:0.55;CDS:0.45;	ENSMUSG00000078348.4	Sf3b5	chr10	protein_coding	splicing factor 3b, subunit 5
chr10	127534416	127534552	chr10_35395_IP1	4	-	137	4	127534428	five_prime_UTR:0.88;CDS:0.12;	ENSMUSG00000040258.6	Nxph4	chr10	protein_coding	neurexophilin 4
[truncated: 17,020 more rows]
